# Supplementary material for: A P–H functionalized Al/P-based frustrated Lewis pair – hydrophosphination of nitriles, ring opening with cyclopropenones and evidence of PC double bond formation
Source: Royal Society of Chemistry journal article supplement (doi:10.1039/c8dt01836g), 2018-01-01
Supplement: c8dt01836g1.pdf [file c8dt01836g1.pdf]

## Supporting Information

### **A P-H Functionalized Al/P-Based Frustrated Lewis Pair – Hydrophosphination of Nitriles, Ring Opening with Cyclopropanones and Evidence of P=C Double Bond Formation<sup>†</sup>**

**Lukas Keweloh,<sup>a</sup> Niklas Aders,<sup>a</sup> Alexander Hepp,<sup>a</sup> Damian Pleschka,<sup>a</sup> Ernst-Ulrich Würthwein,<sup>b</sup> and Werner Uhl<sup>\*a</sup>**

---

<sup>a</sup>*Institut für Anorganische und Analytische Chemie der Universität Münster, Corrensstraße 30, D-48149 Münster, Germany. E-mail: uhlw@uni-muenster.de*

<sup>b</sup>*Organisch-chemisches Institut and Center for Multiscale Theory and Computation (CMTC), Westfälische Wilhelms-Universität Münster, Corrensstrasse 40, 48149 Münster, Germany, E-mail: wurthwe@uni-muenster.de*

<sup>†</sup>Electronic supplementary information (ESI) available. CCDC 1xxxxxx–1xxxxxx. For ESI, crystallographic data in CIF or results of quantum chemical calculations see DOI: .....

## DFT Calculations

All calculations were performed using the GAUSSIAN 09 D01 package of programs.<sup>1</sup> The structures were fully optimized for the gas phase using the TPSS<sup>2</sup> functional including the dispersion correction GD3BJ.<sup>3</sup> The triple zeta basis set (def2-TZVP)<sup>4</sup> was used in all calculations. Zero point vibrational energies and free enthalpy contributions were determined analytically.

**Table S1.** DFT-calculated total electronic energies  $E$  after geometry optimization using the keyword TPSSTPSS, total free energies  $G_{298}$ , including the dispersion correction GD3BJ [a.u.] and the respective relative energies  $E_{\text{rel}}$  [kcal/mol]. The def2-TZVP basis set was used in all calculations.

| Species                       | $E$ [a.u.]   | $E_{\text{rel}}$ [kcal/mol] | $G_{298}$ [a.u.] | $E_{\text{rel}}$ [kcal/mol] |
|-------------------------------|--------------|-----------------------------|------------------|-----------------------------|
| <b>6 conformer 1 (gauche)</b> | -1.433,66915 | 0,00                        | -1.433,34890     | 0,00                        |
| <b>6 conformer 2 (gauche)</b> | -1.433,66691 | 1,41                        | -1.433,34508     | 2,40                        |
| <b>6 conformer 3 (trans)</b>  | -1.433,66621 | 1,85                        | -1.433,34419     | 2,96                        |
|                               |              |                             |                  |                             |
| <b>FLP (Z)-7</b>              | -3391.87341  | 0,00                        | -3.391,10272     | 0,00                        |
| <b>FLP (E)-7</b>              | -3391.86735  | 3,81                        | -3.391,09701     | 3,58                        |
| <b>Invertomer to(E)-7</b>     | -3391.86653  | 4,32                        | -3.391,09597     | 4,24                        |
| <b>Invertomer to(Z)-7</b>     | -3391.87299  | 0,27                        | -3.391,10250     | 0,14                        |
| <b>TS for P-Inversion</b>     | -3391.83492  | 24,15                       | -3.391,06754     | 22,07                       |
|                               |              | Heat of formation           |                  | Heat of formation           |
| <b>(E)-13</b>                 | -4045.15859  | -68,76                      | -4.044,19977     | -48,92                      |
| <b>(E)-13a</b>                | -4.045,10219 | -33,37                      | -4.044,14551     | -14,87                      |
| <b>(Z)-13</b>                 | -4045.14177  | -58,21                      | -4.044,18157     | -37,50                      |
| <b>(Z)-13a</b>                | -4045.08987  | -25,63                      | -4.044,13248     | -6,69                       |
| <b>(E)-14</b>                 | -4368.11226  | -61,18                      | -4.367,15375     | -40,60                      |
| <b>(E)-14a</b>                | -4368.07154  | -35,63                      | -4.367,11464     | -16,06                      |
| <b>(Z)-14</b>                 | -4368.09841  | -52,48                      | -4.367,14308     | -33,90                      |
| <b>(Z)-14a</b>                | -4368.05406  | -24,65                      | -4.367,09842     | -5,88                       |
|                               |              | Barrier                     |                  | Barrier                     |
| <b>TS (E)-13a-(E)-13</b>      | -4.045,05611 | 28,91                       | -4.044,10455     | 25,71                       |
| <b>TS (Z)-13a-(Z)-13</b>      | -4045.06733  | 14,14                       | -4.044,11544     | 10,69                       |
| <b>TS (E)-14a-(E)-14</b>      | -4368.02436  | 29,61                       | -4.367,07247     | 26,46                       |
| <b>TS (Z)-14a-(Z)-14</b>      | -4368.01674  | 23,42                       | -4.367,06371     | 21,78                       |

## GAUSSIAN 09 Archive Entries

**Structural formula, Heat of formation [au], Number of imaginary frequencies (with negative frequency for transition states), Cartesian coordinates**

### FLP's and starting materials

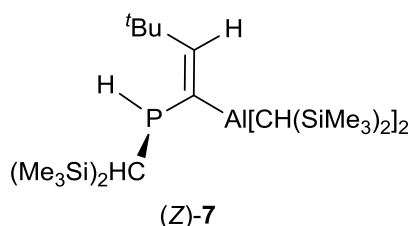

HF=-3391.873413 au (0)

```
1\1\GINC-PALMA282\FOpt\RTPSSSTPSS\def2TZVP\C27H68Al1P1Si6\WURTHWE\23-Jan-2018\0\#\# tpsstps/def2tzvp Opt=readfc Pop=NBO Freq emp=gd3bj geom=c heck guess=read\((Z)-FLP (X-ray))\0,1\Al,-0.0068905795,-0.0476079806,-0.001020321\C,0.0889370693,-0.0636981183,1.9642901855\H,1.1745291402,-0.0292063221,2.1609887671\Si,-0.5647306818,-1.545179533,2.9107177565\C,0.6467692725,-2.9853768209,2.7381161534\H,0.8172834601,-3.2734936718,1.6962546557\H,0.2755006084,-3.8708883205,3.2689892132\H,1.6194806912,-2.7274517625,3.1738869271\C,-2.2695672642,-2.0792941871,2.2987039012\H,-2.997257675,-1.2625271093,2.3676690945\H,-2.646664045,-2.9095417196,2.9087739134\H,-2.2511838354,-2.4183481555,1.2583264057\C,-0.7336949038,-1.2328667925,4.767737265\H,0.2034921073,-0.8734587218,5.2078145791\H,-1.0031476407,-2.167738242,5.2760894165\H,-1.5142497311,-0.4988865556,4.9978696735\Si,-0.5020224273,1.6405625286,2.5103005409\C,0.2316440589,2.9314431623,1.3391792007\H,-0.1306027557,3.9379035847,1.583358835\H,0.0038831297,2.7560270895,0.2813804251\H,1.324801354,2.9297544344,1.4298497336\C,0.1008425685,2.1205874465,4.232050759\H,-0.1492348326,3.1708266978,4.4305630143\H,1.1888584937,2.0182462072,4.3120114353\H,-0.3506408575,1.5142209083,5.0218804856\C,-2.388980517,1.7183399746,2.4884814574\H,-2.8125057529,1.0949669477,3.285015875\H,-2.807382438,1.3659964309,1.5392882386\H,-2.7436342548,2.7434902205,2.649497282\C,-1.6742199792,-0.398955227,-0.9714304803\H,-2.3142093542,-0.7309719423,-0.1331800073\Si,-2.720316552,0.9349803439,-1.7911012402\C,-2.2456218957,2.6951858306,-1.3005973425\H,-1.2229453779,2.9416954725,-1.608711499\H,-2.3206864651,2.865422099,-0.2223713453\H,-2.9171666098,3.4087587602,-1.7951897746\C,-2.6612326803,0.9063784375,-3.6794463364\H,-3.2782514212,1.7286967942,-4.0635406899\H,-3.0521282704,-0.0242353471,-4.1051892105\H,-1.6460656394,1.0520341054,-4.0634060334\C,-4.5100383309,0.6570402535,-1.2550354522\H,-4.6136254203,0.7455048448,-0.1663707377\H,-4.8605561192,-0.3421687492,-1.5387369898\H,-5.184018054,1.3919054667,-1.7120905218\Si,-1.3985516232,-1.9748035111,-1.962305184\C,-0.3373651911,-3.1445863284,-0.9076180275\H,-0.883706972,-3.5417530883,-0.0461938746\H,0.5633275405,-2.6418866565,-0.520428445\H,0.0206041593,-3.99763848,-1.4970767694\C,-0.4522206267,-1.7112078985,-3.5700113128\H,-0.1558052058,-2.686126847
```

, -3.9772944209\H, 0.4615258349, -1.1317215726, -3.4039404663\H, -1.045315038, -1.1996266637, -4.3329925443\C, -3.0274866163, -2.8536182007, -2.3289359623\H, -3.6783575582, -2.2461025456, -2.9683147418\H, -3.5770787995, -3.0652694656, -1.4037114758\H, -2.8550842527, -3.8082497726, -2.8414303428\C, 1.5998645609, 0.5263036361, -0.9809493766\C, 1.2728548449, 1.1818438029, -2.1227326271\H, 0.2444251062, 1.0580901924, -2.4806015075\C, 2.0888717345, 2.1226488232, -3.0090328254\C, 2.6918214106, 3.2608706381, -2.1627477235\H, 3.3609806843, 2.8801835614, -1.3844074975\H, 1.9011118938, 3.8352223723, -1.6687993601\H, 3.2666576154, 3.9402648426, -2.803191997\C, 3.2104742344, 1.3598175515, -3.7436518035\H, 3.7575180774, 2.0466990758, -4.4005723294\H, 2.7958929718, 0.5538733661, -4.357799511\H, 3.9251952066, 0.9238902347, -3.0404659934\C, 1.1450015634, 2.7331791457, -4.0618460041\H, 1.6885807633, 3.4300227801, -4.7090922946\H, 0.3250226955, 3.2804521246, -3.58314827\H, 0.7086434604, 1.9505616869, -4.6934443404\P, 3.135111031, 0.6530271401, -0.0255139712\H, 4.1433364231, 0.6414666337, -1.0257822354\C, 3.415179566, -1.0794142479, 0.6393234797\H, 2.4344344624, -1.4143403146, 1.0133639837\Si, 4.4983148816, -0.8526638457, 2.1919085915\C, 5.0761137935, -2.5035427146, 2.8988172208\H, 5.6234276141, -2.3339429211, 3.8346193452\H, 5.7478132836, -3.0365047811, 2.2173023863\H, 4.2316166584, -3.1649420056, 3.1238476223\C, 6.0013066405, 0.2094399628, 1.7828127239\H, 5.6942522959, 1.1826132061, 1.3820085114\H, 6.6636681157, -0.2644546329, 1.0519800189\H, 6.5850363798, 0.3960648544, 2.6928524221\C, 3.5115805737, 0.0404206057, 3.5270397424\H, 4.1544226331, 0.2560143807, 4.3896181606\H, 2.6642716952, -0.5527634631, 3.8879349336\H, 3.126229707, 0.9950747518, 3.1525408875\Si, 4.0117287378, -2.3536154125, -0.6300271742\C, 3.139182542, -2.1872995491, -2.2875724534\H, 3.5328010215, -2.9431515229, -2.9797413495\H, 3.294815108, -1.2044675397, -2.738768722\H, 2.0607591623, -2.3421398746, -2.2053097052\C, 3.6773363916, -4.0991230549, 0.0059736519\H, 2.6056374655, -4.2561418176, 0.1756498157\H, 4.1974886761, -4.3159617676, 0.9435510928\H, 4.0034582971, -4.8385354676, -0.7365296872\C, 5.8591138949, -2.1356183534, -0.9447135959\H, 6.4648155653, -2.3618923158, -0.0607122726\H, 6.0940247239, -1.1116882492, -1.2584935687\H, 6.1830239307, -2.8083649642, -1.7484063215\\Version=EM64L-G09RevD.01\State=1-A\HF=-3391.873413\RMSD=7.136e-09\RMSF=2.497e-06\Dipole=-0.0358619, -0.1627011, -0.1967796\Quadrupole=-1.4042728, 0.9390078, 0.465265, -0.8609234, -0.5361556, -1.371918\PG=C01 [X(C27H68A11P1Si6)]\@

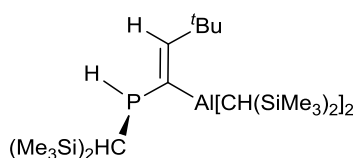

(E)-7

HF=-3391.8673475 au (0)

1\1\GINC-LUPUS04\FOpt\RTPSSTPSS\def2TZVP\C27H68A11P1Si6\WURTHWE\21-Feb-2018\0\#\tpsstpss\def2tzvp opt=readfc emp=gd3bj pop=nbo freq geom=ch eck guess=read int=(grid=ultrafine,acc2e=11)\(E)-FLP \\0,1\C,0.1409179713, -0.5101113253, 0.4610269122\Si, -0.4502100975, -0.7397449924, 2.2388149594\C, 0.8459227864, -0.2567022237, 3.5252692146\Al, 0.500255647, -2.1629610948, -0.5485023885\C, -1.230499408, -3.0473623434, -0.9981242404\P, -2.6

031019581,-1.8332883526,-1.1681631206\C,-2.4471154171,-0.9034853682,-2.7896799648\Si,-2.8195234977,-1.9183425299,-4.3475607408\C,-4.6851183233,-2.1261808753,-4.5457926972\C,2.3011446295,-2.417228031,-1.3182388903\Si,2.3381080868,-2.9073004442,-3.1313280496\C,4.073147137,-2.8124131923,-3.8740492849\Si,1.216787557,0.9913690381,0.1433130795\C,0.4878891842,2.5581897645,0.9107251307\C,1.360518584,1.3096088531,-1.717961298\C,2.9682967276,0.797675887,0.815663584\C,-0.917742492,-2.5336850797,2.6027057615\C,-2.0047614611,0.2932112054,2.507860479\Si,3.6500451775,-3.1697475247,-0.23228712\C,5.2695263025,-2.2269427089,-0.4800362443\C,3.2041277695,-3.0326861887,1.6000136311\C,4.0416756994,-4.9765413856,-0.6227621084\C,1.2597579903,-1.7093531412,-4.1154584782\C,1.6680327342,-4.644373098,-3.4135673566\C,-1.6369448177,-4.3294522244,-0.8425952773\C,-0.8903152883,-5.5237219481,-0.2909533329\C,-1.6448874835,-6.0069190195,0.9701074601\C,-0.9139380376,-6.663388681,-1.3337760966\C,0.5450599026,-5.1715489105,0.0774379215\Si,-3.4996816582,0.6684428491,-2.5394021091\C,-2.6454267577,1.7932562721,-1.2947663689\C,-3.7103690762,1.6414740575,-4.1425744843\C,-5.2013028927,0.2252327788,-1.8598577885\C,-2.0821744565,-3.6496636442,-4.2878918599\C,-2.1309314553,-1.0497855143,-5.8762397373\H,-0.8267978674,-0.2608548118,-0.0252785207\H,1.9833732829,0.5589993914,-2.2164507605\H,1.8177209941,2.2889525273,-1.9066684433\H,0.381350231,1.3028736284,-2.2105798815\H,2.9853092224,0.6918705711,1.9049261212\H,3.5652966693,1.6817959427,0.5587244097\H,3.4746753422,-0.0735699467,0.3898011269\H,-0.5221383336,2.7591000446,0.5376227106\H,1.1135155736,3.4253418909,0.6629649088\H,0.4321139539,2.4950194435,2.0032263811\H,-1.3560241714,-2.6185183286,3.6053113568\H,-0.0456047178,-3.1994022108,2.5767535716\H,-1.6523556735,-2.9046490319,1.880355646\H,-2.3927741674,0.1695475243,3.5266464886\H,-2.787109785,-0.0263363289,1.8081807228\H,-1.8229555491,1.3609421588,2.3448303396\H,1.1377815662,0.7966176201,3.4578952002\H,1.7542440501,-0.8636789301,3.4422952766\H,0.4336974054,-0.4199641335,4.5293278322\H,2.6048766926,-1.3515745517,-1.3289928333\H,2.3352686522,-3.6432232656,1.8710777184\H,2.9802085627,-1.9946896753,1.8691012095\H,4.0403905204,-3.3623192781,2.2291296661\H,4.8563280716,-5.3086864045,0.0336811999\H,4.3874123631,-5.0984480661,-1.6554775525\H,3.1986399521,-5.6551989172,-0.4694052195\H,5.1718854246,-1.1601287045,-0.2507511265\H,5.6302766297,-2.3123171339,-1.5104737111\H,6.0466991274,-2.6341025502,0.1793348706\H,1.6771127762,-0.6963839951,-4.1221955745\H,0.2475341531,-1.6467015722,-3.6994460328\H,1.1623218356,-2.0362813626,-5.1578205694\H,1.6961246564,-4.8892680308,-4.4825527372\H,0.6254480536,-4.7157657129,-3.0873977197\H,2.2432488262,-5.4097611936,-2.8821965256\H,4.7606319029,-3.5394866113,-3.4277949175\H,4.5107871094,-1.8156310438,-3.7430779666\H,4.0312622032,-3.0170897102,-4.9515242858\H,-2.6824993561,-4.5821130503,-1.0642861473\H,-0.3748400414,-6.3845294222,-2.2428165556\H,-1.9460980232,-6.9067391215,-1.6094082649\H,-0.4508733627,-7.5664057041,-0.9190580292\H,1.0632506038,-6.0239210395,0.5294169803\H,0.5573018215,-4.3623300237,0.8231838094\H,1.1132560243,-4.8550796903,-0.8003949298\H,-1.171734493,-6.9132423716,1.3666017282\H,-2.6873577872,-6.2435010927,0.7303139425\H,-1.6369631306,-5.240511358,1.7504477763\H,-3.6427601453,-2.727185622,-1.5491336367\H,-1.407623595,-0.5422122066,-2.841213013\H,-4.2426006448,2.5782145159,-3.9337657281\H,-4.289279339,1.0951452515,-4.894794758\H,-2.7429741315,1.9027782449,-4.5869532783\H,-5.1191794602,-0.2968518002,-0.8994940281\H

,-5.7764370285,-0.4082805033,-2.5420628949\H,-5.7785593171,1.142544047  
6,-1.6885512263\H,-3.2655203851,2.6749653823,-1.0902783802\H,-1.678121  
1495,2.1492414538,-1.6654817563\H,-2.4785746508,1.2776702734,-0.343648  
4972\H,-2.2817090184,-4.1555705764,-5.2415827552\H,-2.5192856573,-4.25  
36019561,-3.4871408418\H,-1.0000902131,-3.6374269,-4.1362154878\H,-1.0  
553896349,-0.8652455498,-5.7774699174\H,-2.6189598513,-0.0891672397,-6  
.0667839525\H,-2.2780327216,-1.679614269,-6.7629300234\H,-5.1973208721  
,-1.1765222054,-4.7342077609\H,-5.1374403248,-2.5819778757,-3.65731331  
84\H,-4.8927137672,-2.7874326407,-5.396312809\\Version=AS64L-G09RevD.0  
1\State=1-A\HF=-3391.8673475\RMSD=5.567e-09\RMSF=1.011e-06\Dipole=0.14  
21635,-0.5532482,-0.1710144\Quadrupole=-2.4434826,3.6160386,-1.172556,  
-0.1344806,1.5503908,-3.0890461\PG=C01 [X(C27H68A11P1Si6)]\@

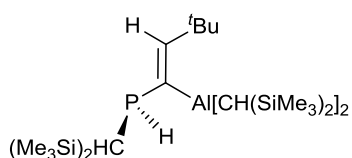

Invertomer to (E)-7

HF=-3391.8665341 au (0)

1\1\GINC-LUPUS04\FOpt\RTPSSTPSS\def2TZVP\C27H68A11P1Si6\WURTHWE\26-Feb  
-2018\0\# tpsstps\def2tzvp opt=readfc emp=gd3bj pop=nbo freq int=(gr  
id=ultrafine,acc2e=11) geom=check guess=read\\ (E)-FLP after P-Inversion  
\\0,1\C,-0.0341622353,0.0132177953,-0.0183421529\Si,-0.0420980683,0.0  
437965314,1.858040089\C,1.6863053886,0.0809965393,2.6109743126\Si,0.47  
01540013,-1.6281786909,-0.7991510253\C,-1.0299222117,-2.7719672806,-0.  
8892091513\Al,0.504675011,1.647289388,-0.9838778532\C,1.6356289916,2.9  
522057123,-0.0138973458\Si,3.5087049121,2.7042395179,0.0182389681\C,4.  
4680270646,3.8504270338,-1.1392464386\C,1.8435391613,-2.5192516058,0.1  
423264545\C,1.0927325318,-1.4162803153,-2.5700564032\C,-0.5488888659,1  
.844172787,-2.6640758108\C,-0.1463715198,2.0481974674,-3.941235416\C,1  
.2397811512,2.2410611512,-4.5105766773\C,2.307142324,2.2183460203,-3.4  
247036139\P,-2.345745117,1.352687392,-2.6826872623\C,-3.2375922332,2.2  
045726593,-1.2793950571\Si,-4.6114302826,1.0294275891,-0.676951318\C,-  
5.4245524058,0.1410603578,-2.1264497559\Si,-3.8679170995,3.8798387732,  
-1.9279599314\C,-4.3848158691,5.0018449952,-0.5022087952\C,-5.33191312  
27,3.6150274178,-3.0865572952\C,-2.542328131,4.7666699327,-2.933443748  
1\Si,1.0699850764,4.7408523351,-0.1173229672\C,1.2020692194,5.41727184  
6,-1.8698894097\C,2.0268737139,5.8919104689,1.0369839295\C,-0.73638273  
17,4.8415817121,0.4207806065\C,-0.9255397181,-1.4615756787,2.586365515  
5\C,-0.9587274745,1.5793508287,2.4809551339\C,4.1701991808,3.068041038  
1,1.7519668993\C,3.9784102274,0.9184252183,-0.3881061288\C,1.494563181  
4,1.0947084529,-5.5174305576\C,1.2843277951,3.580277252,-5.2802246355\  
C,-3.8817723833,-0.2767812236,0.4674722344\C,-5.938973565,1.932793666,  
0.3143759498\H,-1.1102529665,0.0498052541,-0.2838454703\H,-0.383055591  
5,2.4960711374,2.3136382427\H,-1.1444550687,1.5042711835,3.5596776514\  
H,-1.9288999808,1.7088604368,1.9877153784\H,2.2611659293,-0.8206227489  
,2.377494416\H,1.6105665523,0.1517951358,3.7034381387\H,2.2656942241,0  
.942371818,2.2672452585\H,-1.9579087879,-1.5428179632,2.2306033039\H,-

0.9548658344,-1.3856058873,3.6809582296\H,-0.4135153328,-2.3976398024,  
2.3366662959\H,1.2601775392,-2.3965211356,-3.0343092686\H,2.047889809,  
-0.8774687623,-2.6054014226\H,0.3725590455,-0.8692865984,-3.1876135827  
\H,-0.7559328846,-3.7400772031,-1.3270219379\H,-1.8147205385,-2.336628  
729,-1.5204837391\H,-1.4635226921,-2.9614526588,0.0984436341\H,1.55821  
54705,-2.7741431316,1.1683672794\H,2.7643818374,-1.9276703243,0.185954  
087\H,2.0814164143,-3.4574046141,-0.3753259638\H,1.3638438831,2.649160  
7241,1.0164285873\H,3.754910166,0.6466849516,-1.4256597673\H,3.4457117  
274,0.2177135094,0.2633529902\H,5.0529465223,0.7579106383,-0.235098173  
2\H,5.5408759333,3.6604489065,-1.0051061319\H,4.2938409372,4.905107034  
5,-0.8990490096\H,4.2392640968,3.7060726366,-2.1980555081\H,3.69934596  
88,2.4472149005,2.5218910847\H,4.0126415925,4.1154921856,2.0295626832\  
H,5.2497186038,2.8733047269,1.7890103005\H,-0.8508275659,4.6187075247,  
1.4876600292\H,-1.3637452614,4.1330293128,-0.1313966039\H,-1.144955407  
6,5.8439117509,0.2447563224\H,0.8362158696,6.450740821,-1.9070802773\H  
,0.5927116947,4.8263762054,-2.561417158\H,2.2328747897,5.4167915635,-2  
.240099102\H,3.0858451624,5.9780993199,0.77093133\H,1.9705256654,5.550  
6148888,2.0774290064\H,1.5941798546,6.8998776142,0.9959449693\H,-0.907  
3526086,2.0230569683,-4.7325280203\H,1.1258792177,4.4302534821,-4.6114  
224469\H,0.5091003988,3.6028861994,-6.0539259277\H,2.2579112528,3.7008  
392466,-5.7694239604\H,3.3135114557,2.2939122418,-3.8503625764\H,2.266  
6099381,1.2682395891,-2.8720542801\H,2.1716653588,3.0433628847,-2.7217  
006132\H,2.4671730977,1.2346484803,-6.0037238867\H,0.722335816,1.08230  
92587,-6.2941387811\H,1.4933519325,0.1227018497,-5.0159034124\H,-2.179  
2829643,0.078840237,-2.0646535008\H,-2.5763948729,2.3702866842,-0.4131  
719361\H,-6.6511486798,1.1993758518,0.7137036635\H,-6.5074755439,2.648  
9559797,-0.2877883509\H,-5.5095771473,2.4736468643,1.1655480848\H,-4.7  
047062425,-0.4658751399,-2.6867603761\H,-5.8928449337,0.8327626491,-2.  
8327312057\H,-6.2037557704,-0.5325548137,-1.7471709687\H,-4.6680802957  
,-0.9770905636,0.7766365031\H,-3.4637923962,0.1695479187,1.3755941369\  
H,-3.0942743941,-0.8638395369,-0.0147184999\H,-2.9286718225,5.73747128  
85,-3.2698697527\H,-2.2620371749,4.1911284315,-3.8221532191\H,-1.63178  
52944,4.9509379931,-2.3577287212\H,-3.5884263537,5.1032890231,0.242511  
6133\H,-5.2791393249,4.6353935612,0.0104117125\H,-4.6090960771,6.00553  
96905,-0.8851490958\H,-6.2140725045,3.2125407041,-2.5775083952\H,-5.06  
42867218,2.9283861966,-3.8977934993\H,-5.6203092754,4.5714509302,-3.54  
03230398\\Version=AS64L-G09RevD.01\State=1-A\HF=-3391.8665341\RMSD=3.4  
63e-09\RMSF=7.805e-07\Dipole=0.4134911,0.2281633,-0.1221173\Quadrupole  
=1.0256052,-1.2357777,0.2101725,-0.7399811,-5.7163026,-0.7537643\PG=C0  
1 [X(C27H68Al1P1Si6)]\@

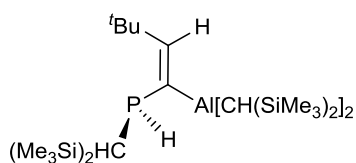

Invertomer to (Z)-7

HF=-3391.8729865 au (0)

1\1\GINC-PALMA264\FOpt\RTPSSTPSS\def2TZVP\C27H68Al1P1Si6\WURTHWE\14-Fe

b-2018\0\#\# tpsstps/def2tzvp opt=readfc geom=check guess=read emp=gd3  
bj freq pop=nbo\(\Z)-FLP (P-inverse)\0,1\C,-0.0689617981,0.0243079289,-0  
.0911581874\Si,-0.0224654378,-0.0596874955,1.7896076504\C,1.7597424681  
,0.0450241728,2.4041127716\Al,0.3938520113,-1.7793470825,-0.7249504735  
\C,-1.0633753413,-3.0618700495,-1.0144401056\P,-2.8204507373,-2.568853  
179,-1.2832224808\C,-2.6778085254,-1.1327366874,-2.468526777\Si,-2.702  
1347914,-1.7902963758,-4.252704564\C,-4.4587313242,-2.2364152551,-4.77  
11335608\C,2.2568591417,-2.389091078,-0.8524131903\Si,2.5660797314,-2.  
7450360493,-2.6734013177\C,4.3969752426,-2.6017406852,-3.1056505662\Si  
,0.742083121,1.5116629511,-0.8978757918\C,0.4783325721,3.1208098676,0.  
0596420593\C,-0.0227430465,1.7945254458,-2.6020023581\C,2.6104327498,1  
.2977505327,-1.0741575155\C,-0.8220523094,-1.6818192341,2.3504991286\C  
, -1.0273079134,1.3010643865,2.6255041424\Si,3.0733189936,-3.5521303597  
,0.3818585367\C,4.7355394746,-2.7939760287,0.8620504796\C,2.081349753,  
-3.8058181608,1.9688915607\C,3.3961670486,-5.2891291329,-0.2889845097\  
C,1.6259043354,-1.4389865213,-3.6817031642\C,1.9136077767,-4.416211301  
3,-3.2502388897\C,-0.7067197739,-4.3303890021,-0.7028792579\C,-1.54405  
3376,-5.5841990304,-0.4424809675\C,-0.5902595041,-6.7227885438,-0.0346  
777767\C,-2.5363138606,-5.3221932401,0.7098800229\C,-2.3200843327,-6.0  
111439673,-1.7051844595\Si,-4.0472150294,0.1214497223,-2.050113888\C,-  
3.6003534218,1.1009880738,-0.4991034845\C,-4.3045565435,1.3762245842,-  
3.4351613065\C,-5.6728389984,-0.7685407197,-1.7076223196\C,-1.66505736  
55,-3.3531090434,-4.4114692713\C,-1.9836574553,-0.498060768,-5.4229158  
161\H,-1.145051625,0.0949684003,-0.3247743946\H,0.0667757795,0.9220495  
78,-3.2560193598\H,0.4582084708,2.640000965,-3.1096015283\H,-1.0897948  
465,2.0306037697,-2.5126343917\H,3.0889479954,1.1050170295,-0.10709055  
05\H,3.0551218992,2.2126925107,-1.4851933398\H,2.8766852517,0.47434692  
57,-1.7440300583\H,-0.5833480128,3.3112502489,0.253728863\H,0.86630678  
8,3.96481342,-0.5253087027\H,1.0003466569,3.1241552419,1.0232462624\H,  
-0.7066993845,-1.8238831458,3.4321821281\H,-0.4172619523,-2.5755293704  
,1.8624367753\H,-1.8964817185,-1.6600351706,2.12982213\H,-1.0895821355  
,1.1032763835,3.703491829\H,-2.0507682126,1.3346124873,2.2353941156\H,  
-0.5873162323,2.2929612537,2.4926364167\H,2.1667195874,1.0497745605,2.  
2390862172\H,2.4172990703,-0.6632539179,1.8884180841\H,1.8219654641,-0  
.1624386109,3.4790945717\H,2.7887432906,-1.4356811567,-0.6796080599\H,  
1.1106813723,-4.2752340342,1.7714026119\H,1.8966662958,-2.8688364685,2  
.5027221683\H,2.6329806745,-4.4694176967,2.6471632803\H,3.8581889638,-  
5.8915241258,0.5036009559\H,4.0780106252,-5.2961186244,-1.1464284822\H  
,2.4729658506,-5.7961567767,-0.5888108836\H,4.6010473308,-1.8121277106  
,1.332721259\H,5.3766351036,-2.6527239405,-0.0160331569\H,5.2758046745  
, -3.4306019203,1.5734076535\H,2.0525664471,-0.4369946896,-3.5718335246  
\H,0.56744107,-1.3802165814,-3.3802183853\H,1.6222540821,-1.6849253448  
, -4.7507182741\H,1.9489773055,-4.4570917275,-4.3463137579\H,0.87144015  
61,-4.5629391096,-2.9486919981\H,2.4989142158,-5.2570738328,-2.8683032  
009\H,4.9944051802,-3.3523633168,-2.5753151516\H,4.7892401011,-1.61448  
07997,-2.8329968099\H,4.5631513526,-2.74296364,-4.1808421989\H,0.36589  
80157,-4.5162556483,-0.5686980257\H,-3.2713678042,-4.5630126493,0.4239  
570758\H,-2.0120102265,-4.9757966216,1.6069858679\H,-3.0744426384,-6.2  
454515432,0.9568987799\H,-2.8744765779,-6.9351555367,-1.5007384912\H,-  
1.6357596553,-6.1997323829,-2.5389577775\H,-3.0357082701,-5.239231324,  
-2.0016551108\H,-1.1530794659,-7.6389747177,0.1739693659\H,-0.02383420



1,-6.4580729569,0.8658210215\H,0.1257557544,-6.93778509,-0.8363979617\H,-2.9451831956,-1.825102382,-0.073921244\H,-1.7169430339,-0.6119225898,-2.3160531721\H,-5.0581752622,2.1122252743,-3.1279091655\H,-4.6565301954,0.9098930387,-4.3610900427\H,-3.3816372501,1.9216076336,-3.6626498168\H,-5.5775944456,-1.4682712479,-0.8696845927\H,-6.0272310724,-1.3364976602,-2.5729913037\H,-6.4470431441,-0.0364494481,-1.4448351523\H,-4.4344610334,1.7649966305,-0.2385756346\H,-2.7149054475,1.7291168629,-0.643218937\H,-3.4181382572,0.4526526244,0.3647544429\H,-1.6628861062,-3.6914918291,-5.455717011\H,-2.0661113689,-4.1659828963,-3.7988819771\H,-0.6266430688,-3.1956968358,-4.1089474451\H,-0.9462925117,-0.2598977896,-5.1613263025\H,-2.5510203528,0.4371819776,-5.4180348029\H,-1.9828674369,-0.8840440584,-6.4501474792\H,-5.122696607,-1.3670351553,-4.8250263952\H,-4.8976573637,-2.953940612,-4.0681161644\H,-4.4483233451,-2.7062875007,-5.7624484402\Version=EM64L-G09RevD.01\State=1-A\HF=-3391.8729865\RMSD=5.685e-09\RMSF=3.355e-06\Dipole=0.1662248,0.088253,-0.0540069\Quadrupole=-2.7819965,0.8205316,1.9614649,-1.5606017,-0.6067467,-1.19099\PG=C01 [X(C27H68A11P1Si6)]\@

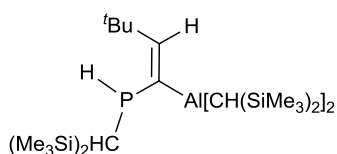

TS-(Z)-7 (P-Inversion)

HF=-3391.834922 au (1, -630,6847cm<sup>-1</sup>)

I\1\GINC-LUPUS06\FTS\RTPSS\TPSS\def2TZVP\C27H68A11P1Si6\WURTHWE\25-Feb-2018\0\# tpsstps\def2tzvp opt=(ts,readfc,noeigentest,maxstep=6) emp=gd3bj freq pop=nbo geom=check guess=read int=(grid=ultrafine,acc2e=11)  
 \((Z)-FLP: TS for P-inversion\0,1\C,0.018007789,-0.0065983297,0.0115698413\Si,0.0049910856,0.0115776091,1.8972135799\C,1.7746909609,0.0237140217,2.5561229191\Al,0.3126592873,-1.8826102956,-0.4975430909\C,-1.2665967313,-3.0104893446,-0.8002680624\P,-2.7460336359,-2.281818383,-1.3601234494\C,-2.6813758656,-0.8578450014,-2.5089114089\Si,-2.7077789033,-1.4811375269,-4.3139469471\C,-4.4850180521,-1.7608163103,-4.8765436003\C,2.0984490713,-2.6822252287,-0.608164826\Si,2.3050544455,-3.1656774975,-2.4157071764\C,4.1221692946,-3.3402706238,-2.8960774714\Si,0.9910778572,1.3599950782,-0.8263209888\C,0.8781514287,3.0192380128,0.075142615\C,0.2896473445,1.6762199117,-2.5521854382\C,2.8324539429,0.9589185376,-0.9570574052\C,-0.9140087452,-1.5237929616,2.505548352\C,-0.9233019221,1.4810160241,2.6329723787\Si,2.8252109553,-3.858974489,0.6687762396\C,4.6009337198,-3.3035923382,0.9967852793\C,1.9251936563,-3.8681619649,2.3297789549\C,2.8628782388,-5.6588849173,0.0978064619\C,1.5760058186,-1.7577280927,-3.4616671976\C,1.3785974576,-4.7357637665,-2.885109053\C,-1.0520473881,-4.2037240568,-0.1686878913\C,-2.0602288068,-5.2618224272,0.2567200321\C,-1.3097703871,-6.4451036465,0.89006545\C,-3.041422806,-4.6789615449,1.2939628799\C,-2.8308143194,-5.7611759371,-0.9838978536\Si,-3.9708953038,0.4463238234,-1.9952331966\C,-3.4801291655,1.2293416314,-0.3551920578\C,-4.0679334015,1.8009004759,-3.3037715076\C,-5.678924205,-0.3206409105,-1.7801144592\C,-1.8060532914,-3.1241408766,-4.4770223052\C,-1.8694743574,-0.2156304421,-5.4358557981\H,-1.0418178012,

0.1473388286,-0.2548751275\H,0.318997667,0.7897918438,-3.1926620934\H,  
0.8538271151,2.4684110179,-3.0600700962\H,-0.7538992587,2.0084518581,-  
2.4904391297\H,3.2631834374,0.7306886268,0.0245682511\H,3.3743022056,1  
.8229692754,-1.3615457739\H,3.0360904174,0.1074094996,-1.6138159413\H,  
-0.160463304,3.3415645288,0.2118172822\H,1.3902286723,3.7909982674,-0.  
5140734967\H,1.3526233691,2.993316712,1.0625176201\H,-0.9481225652,-1.  
5543225119,3.6018030327\H,-0.4678566478,-2.4672124333,2.1705557645\H,-  
1.9455841535,-1.5127479271,2.1322372535\H,-1.0013660207,1.3540905623,3  
.7206383072\H,-1.9416445383,1.5464647981,2.2341222883\H,-0.4269765793,  
2.4366914468,2.4433494441\H,2.2560155226,0.9910311529,2.3688427956\H,2  
.3937081353,-0.746894248,2.0835133177\H,1.7946524713,-0.1492142782,3.6  
388848138\H,2.7245578473,-1.7777616792,-0.4988365016\H,0.8990640341,-4  
.2415891627,2.2384078123\H,1.8807953241,-2.8777328666,2.7932440469\H,2  
.4544590611,-4.5335872951,3.0242306249\H,3.2898194389,-6.2787928407,0.  
8964411029\H,3.4794606302,-5.803116196,-0.796181952\H,1.8614865095,-6.  
0462669467,-0.1186191049\H,4.6253620738,-2.2816044652,1.395717584\H,5.  
1978785255,-3.3122939231,0.0774570027\H,5.0969223487,-3.9554235344,1.7  
263990414\H,2.172838959,-0.842554578,-3.3909331463\H,0.5494246514,-1.5  
01725921,-3.1544990007\H,1.5156266716,-2.0368106366,-4.5206286748\H,1.  
3590919427,-4.8368116838,-3.9775044337\H,0.3429268323,-4.7067739032,-2  
.5308826615\H,1.8496911307,-5.6346687057,-2.4771563768\H,4.6010218378,  
-4.1716895581,-2.3659504168\H,4.6836405376,-2.4285363838,-2.6590030157  
\H,4.2275708834,-3.5287898824,-3.9718546745\H,-0.0118302786,-4.4532069  
866,0.0575616388\H,-3.5500617346,-3.7895248657,0.9080264002\H,-2.50896  
33612,-4.3859765545,2.2046469346\H,-3.8034932973,-5.4215296489,1.55969  
30631\H,-3.6188903259,-6.4632525287,-0.6865554544\H,-2.1509816137,-6.2  
724143398,-1.6734085912\H,-3.2966640476,-4.9304240479,-1.5258155013\H,  
-2.0109212197,-7.2275605387,1.2012293369\H,-0.7449986513,-6.1224963239  
,1.7726468482\H,-0.6040319756,-6.8846093967,0.1757049963\H,-4.02486157  
93,-2.614487896,-0.9162970564\H,-1.7127631947,-0.3667130643,-2.3231483  
48\H,-4.7543731252,2.5894839804,-2.9709345072\H,-4.4367439939,1.427023  
4904,-4.2649675089\H,-3.0904174528,2.2648887321,-3.4779539181\H,-5.703  
297732,-1.0289679096,-0.9444315609\H,-6.0247581329,-0.8426727986,-2.67  
71555779\H,-6.4039753815,0.4717404284,-1.5550105347\H,-4.2842021496,1.  
8839154854,0.003683336\H,-2.5724177151,1.8366587894,-0.4381623943\H,-3  
.3090822285,0.4609761592,0.4069917263\H,-1.6674151796,-3.3670256388,-5  
.5387572503\H,-2.3761754171,-3.9340449341,-4.0109190671\H,-0.820848269  
2,-3.1095128156,-4.0042089128\H,-0.8100308376,-0.1027549532,-5.1780922  
948\H,-2.333225729,0.7739605433,-5.3744189214\H,-1.920020389,-0.543726  
477,-6.4815980922\H,-5.0717006889,-0.8367864758,-4.9179367002\H,-4.999  
8338261,-2.4615387579,-4.2086081499\H,-4.4899102235,-2.2012127074,-5.8  
812817972\\Version=AS64L-G09RevD.01\State=1-A\HF=-3391.834922\RMSD=7.7  
76e-09\RMSF=1.155e-06\Dipole=-0.2369322,0.3422969,-0.1873782\Quadrupol  
e=0.4320471,-1.4063865,0.9743394,-1.21304,-0.1695509,-1.5130376\PG=C01  
[X(C27H68Al1P1Si6)]\@

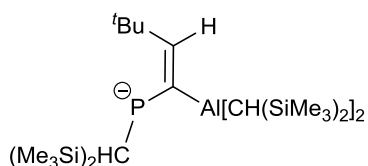

(Z)-7-Anion

HF=-3391.307122 au (0)

```

I\1\GINC-LUPUS04\FOpt\RTPSSSTPSS\def2TZVP\C27H67A11P1Si6(1-)\WURTHWE\14
-Feb-2018\0\# tpsstps/def2tzvp Opt=readfc Pop=NBO Freq emp=gd3bj geo
m=check guess=read\FLP-Anion (without H at P)\-1,1\C,-0.0316768275,-0.0
702955404,-0.0034929982\Si,-0.0880522126,-0.0906317289,1.8681122046\C,
1.6677274935,-0.0465084278,2.58299341\Al,0.2394333164,-1.9463105704,-0
.6008983188\C,-1.2841150822,-3.0981955711,-0.8998411258\P,-2.929706928
6,-2.4267501536,-1.1056592407\C,-2.6151369546,-1.0444126446,-2.4067261
637\Si,-2.691492696,-1.8405358228,-4.1048366791\C,-4.4761490221,-2.254
1208242,-4.5778660994\C,2.1215456515,-2.5992272027,-0.6577400538\Si,2.
4741285979,-3.0775925669,-2.4344686923\C,4.3358210242,-3.166992893,-2.
7908885666\Si,0.8994536493,1.3196678771,-0.8216810939\C,0.7103782273,2
.9912500861,0.0597533515\C,0.2573517329,1.6138555918,-2.5745925794\C,2
.7697280595,1.0227778344,-0.9077534288\C,-1.0205254027,-1.6265158928,2
.438119531\C,-1.0203959365,1.3733259728,2.6271723172\Si,2.8548459793,-
3.7280167183,0.6420311056\C,4.5752179722,-3.061593565,1.0863056011\C,1
.8833103495,-3.8480656985,2.2578900442\C,3.0784405038,-5.5230985097,0.
0823395028\C,1.7783766105,-1.736301237,-3.5808949822\C,1.6792492202,-4
.7066553051,-2.9492907469\C,-0.9239625476,-4.3152357745,-0.3519925887\
C,-1.8367828991,-5.4529719617,0.1016446003\C,-0.9749535352,-6.62309391
77,0.6027793179\C,-2.7604323139,-4.9809112744,1.2426480015\C,-2.696848
084,-5.9327072802,-1.0867302437\Si,-3.8539602952,0.3194377472,-2.03891
43883\C,-3.4050279353,1.2743394332,-0.4690421681\C,-3.9836688545,1.602
7418417,-3.4362290971\C,-5.5911464864,-0.3680613029,-1.7556748209\C,-1
.6981006591,-3.4378232707,-4.2163844067\C,-1.9845424363,-0.6967499004,
-5.4553715603\H,-1.0928440653,0.04598467,-0.2865767028\H,0.3363534359,
0.7245203894,-3.2065851712\H,0.8170298851,2.4231375184,-3.0621267638\H
,-0.7992030158,1.9047107056,-2.553779837\H,3.1890182786,0.7856934133,0
.0771567567\H,3.2722504324,1.9281239439,-1.2731136928\H,3.0330534402,0
.2042075178,-1.5851257552\H,-0.342980534,3.2611788428,0.1976985729\H,1
.1830439495,3.7813068767,-0.5396130852\H,1.188002561,2.9968055799,1.04
66385193\H,-1.1139516574,-1.6622133298,3.531466877\H,-0.556195253,-2.5
637023349,2.1129857689\H,-2.0250733779,-1.6164965905,1.9948610916\H,-1
.1151174667,1.2246167589,3.7115542831\H,-2.0310778153,1.4541647136,2.2
124409539\H,-0.5141713869,2.3291845269,2.4626905762\H,2.1209787215,0.9
407771298,2.4284496399\H,2.3236815962,-0.7854276571,2.1108537852\H,1.6
635032391,-0.242485964,3.6626692071\H,2.6691188983,-1.6514571382,-0.51
11906885\H,0.8881804301,-4.271821819,2.0827608551\H,1.7526109057,-2.87
95409474,2.7490937506\H,2.4127909463,-4.5092879802,2.9573270704\H,3.51
73024698,-6.1003219774,0.9071146914\H,3.7443664993,-5.6207964729,-0.78
22262645\H,2.1209035924,-5.98870479,-0.1736519658\H,4.5082243922,-2.04
15239323,1.4857560746\H,5.2282810608,-3.0275442706,0.206016837\H,5.064
496037,-3.6841896328,1.8467463476\H,2.2989548725,-0.7797677799,-3.4611
212307\H,0.7103236328,-1.5595772069,-3.3914794372\H,1.8638647086,-2.03

```

58660402,-4.6331005642\H,1.7046991396,-4.7998560011,-4.0428052862\H,0.6313581699,-4.744613376,-2.6312747561\H,2.1925019006,-5.576478769,-2.5276755631\H,4.8261717836,-3.9516815088,-2.2026830186\H,4.8275094781,-2.2163763272,-2.5485658829\H,4.5233289662,-3.3797401158,-3.8517226561\H,0.1432038728,-4.5413448372,-0.2407343437\H,-3.352315586,-4.116428868,0.9223522723\H,-2.1699148391,-4.6820548349,2.1166130271\H,-3.4471802168,-5.7853612802,1.5428477968\H,-3.4147408433,-6.6996148999,-0.7629026697\H,-2.0584512756,-6.3610463247,-1.8681548307\H,-3.252867534,-5.0877279656,-1.5110537243\H,-1.6036321808,-7.4608634387,0.9311499801\H,-0.3483522818,-6.3138181168,1.4490725024\H,-0.3128806924,-6.9840804917,-0.1944826476\H,-1.6052343515,-0.6137707178,-2.2722550946\H,-4.6447744071,2.4283535965,-3.1396731543\H,-4.3956551956,1.1592033747,-4.3505959725\H,-3.0056580337,2.0303549842,-3.6879206922\H,-5.569280534,-1.119188683,-0.9585800464\H,-6.0029136608,-0.8432852247,-2.6516403043\H,-6.2713752065,0.4408432048,-1.4554834686\H,-4.2060178295,1.982972412,-0.2191432471\H,-2.4750777407,1.8455395953,-0.5663044971\H,-3.2947867383,0.5777327993,0.3693254986\H,-1.7576980404,-3.8475826693,-5.2347713398\H,-2.0767247266,-4.180128755,-3.5086692463\H,-0.6424564099,-3.2761608141,-3.9800666572\H,-0.9329271734,-0.4579015545,-5.251582746\H,-2.5284293289,0.2513723058,-5.5282954023\H,-2.0246112763,-1.1838925229,-6.4394627458\H,-5.080879248,-1.3558575658,-4.7511913651\H,-4.9462354195,-2.8363109043,-3.7769926089\H,-4.4997447481,-2.8543787864,-5.4969740363\Version=AS64L-G09RevD.01\State=1-A\HF=-3391.307122\RMSD=4.430e-09\RMSF=3.258e-06\Dipole=2.0532036,0.7614477,0.264308\Quadrupole=-8.9428477,1.0876046,7.8552432,0.4431402,-7.1305491,1.2491837\PG=C01 [X(C27H67Al1P1Si6)]\@

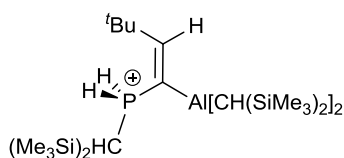

(Z)-7-protonated

HF = -3392.277446 au (0)

1\1\GINC-PALMA303\FOpt\RTPSSTPSS\def2TZVP\C27H69Al1P1Si6(1+)\WURTHWE\14-Mar-2018\0\#\ tpsstps\def2tzvp opt freq pop=nbo emp=gd3bj\FLP, P-Protonated\1,1\C,0.0152220213,0.0139426927,-0.0114603761\Si,0.0390395833,0.0293197462,1.8842237399\C,1.8160836107,0.0217325332,2.5032376965\Al,0.4442343109,-1.8285441945,-0.5019157536\C,-1.144297438,-3.0172793933,-0.7716340825\P,-2.7032393709,-2.247060759,-1.097120707\C,-2.6709454935,-1.0246174808,-2.3897642538\Si,-2.7292093446,-1.8220711127,-4.1558945402\C,-4.5108155623,-2.1831880198,-4.6239182789\C,2.1900891618,-2.6724203588,-0.5518163723\Si,2.4299787054,-3.1013581011,-2.3745592556\C,4.2435327969,-3.0757612377,-2.8611813888\Si,0.950677334,1.4074814006,-0.8813278245\C,0.7928585816,3.0650854704,0.0002035477\C,0.1975606719,1.6469404306,-2.5989386365\C,2.7892432647,1.0181828476,-1.0190015788\C,-0.8745133368,-1.5189988517,2.4897766\C,-0.8935217635,1.4876441652,2.6200403035\Si,2.8813471063,-3.8705541069,0.7417847442\C,4.5999748729,-3.2563894982,1.2000443437\C,1.8359134406,-3.9375650998,2.3119091059\C,3.012061885,-5.6455301778,0.1186519264\C,1.5228592235,-1.7466263306,-3

.3603397658\C,1.6477236946,-4.734990193,-2.8908357588\C,-0.9646532193,-4.3053020243,-0.3902156959\C,-1.940694844,-5.4337337783,-0.0835265611\C,-1.1396746862,-6.6048124245,0.5194561245\C,-2.9869484689,-4.9629224101,0.9497739844\C,-2.6420700776,-5.9277626706,-1.3674797447\Si,-4.0156776841,0.3245707359,-2.0335326108\C,-3.4805723752,1.3252870547,-0.5351203831\C,-4.1807124023,1.4693803219,-3.5068297818\C,-5.6451883684,-0.5271089204,-1.6371585217\C,-1.7908360366,-3.4481537591,-4.1599258267\C,-1.9064703091,-0.6211427614,-5.3332382759\H,-1.0486913053,0.1630752935,-0.2645411348\H,0.227780869,0.7402962903,-3.2116892029\H,0.7314992512,2.4301112929,-3.1504354266\H,-0.8491715331,1.9672260377,-2.5218738423\H,3.2426143697,0.8806876731,-0.0308452816\H,3.3123583253,1.8507136641,-1.5047442275\H,2.9962167268,0.1174312113,-1.6051954855\H,-0.2526646756,3.3498294496,0.1634039644\H,1.256424895,3.8482636612,-0.612756572\H,1.2985169997,3.0728603042,0.9719223151\H,-0.7979072748,-1.6155138133,3.5793794518\H,-0.501672637,-2.4587041295,2.0647075886\H,-1.9428874141,-1.4494292162,2.2460217376\H,-0.9776617943,1.3571503212,3.7062278299\H,-1.9103967927,1.5610118807,2.2180469879\H,-0.3941730452,2.4424980105,2.4381142724\H,2.3040294698,0.98064521,2.2943813316\H,2.4185087902,-0.7623293652,2.0310590509\H,1.8546628745,-0.1352382909,3.5873529064\H,2.8257256342,-1.7765762398,-0.4166059112\H,0.8178676935,-4.2975766111,2.1192504345\H,1.7590559884,-2.9634069339,2.8049003744\H,2.2911417123,-4.631911375,3.0289592771\H,3.3993086244,-6.2744778467,0.9297760292\H,3.6997978091,-5.7462759569,-0.7279647857\H,2.0455172073,-6.0638658237,-0.1827094458\H,4.5598460237,-2.2500705253,1.6348063109\H,5.2549960827,-3.2111282471,0.3223017511\H,5.0746341064,-3.9148789719,1.9369079179\H,2.0470549352,-0.7872900652,-3.3218064887\H,0.4947506095,-1.5650288736,-2.9929995589\H,1.4115514225,-2.0223909949,-4.4160452692\H,1.6807408067,-4.8167600773,-3.984408488\H,0.5971445599,-4.8045703792,-2.590272693\H,2.1736848784,-5.601269888,-2.4816044165\H,4.8048348427,-3.859794252,-2.3400921684\H,4.7075783066,-2.114579474,-2.6109571259\H,4.3691174448,-3.2390233667,-3.938178626\H,0.0784946984,-4.5928737813,-0.2279409144\H,-3.6381685145,-4.1768166648,0.5521238996\H,-2.5029398441,-4.5794458555,1.852945016\H,-3.6283205372,-5.8039482411,1.2317396862\H,-3.2744750388,-6.7879259814,-1.1251023873\H,-1.911967645,-6.240380365,-2.119715431\H,-3.283064324,-5.1582422445,-1.8080327795\H,-1.8099900599,-7.430598957,0.775456881\H,-0.6158036374,-6.2956508571,1.4300345327\H,-0.3970074847,-6.9771423011,-0.1942502329\H,-3.7586561711,-3.1228804814,-1.3911384664\H,-1.6929467169,-0.526159758,-2.3019133435\H,-4.9090932092,2.252851332,-3.2644904687\H,-4.5336684597,0.9619198501,-4.4093638266\H,-3.2314595258,1.9633591105,-3.7403717672\H,-5.5895358914,-1.148697206,-0.7346426403\H,-6.0117011943,-1.1512308304,-2.457087486\H,-6.4054903223,0.2388721676,-1.4418647386\H,-4.2616857038,2.059712288,-0.3024137886\H,-2.5542378158,1.8799487351,-0.7150588612\H,-3.340049839,0.7167793331,0.3653708213\H,-1.7714693159,-3.8405164323,-5.1844987911\H,-2.2649169748,-4.2118181151,-3.5356181005\H,-0.7558892843,-3.3403493333,-3.8273119489\H,-0.8576450194,-0.4578224572,-5.0627054647\H,-2.4021334689,0.3524586748,-5.3644089388\H,-1.924248863,-1.0374440018,-6.347693947\H,-5.1289929905,-1.2850707054,-4.7150287002\H,-4.9925435674,-2.85416564,-3.9027786729\H,-4.5271516228,-2.6918385736,-5.5955408085\H,-3.1477567828,-1.6578118659,0.0996642471\\Version=EM64L-G09RevD.01\State=1-A\HF=-3392.277446\RMSD=4.309e-09\RMSF=2.524e-06\Dipole=-2.1653897,-0.48156

6,-0.6473399\Quadrupole=6.3580279,-0.5517092,-5.8063187,-2.1103911,7.1  
789389,-3.2079427\PG=C01 [X(C27H69Al1P1Si6)]\@

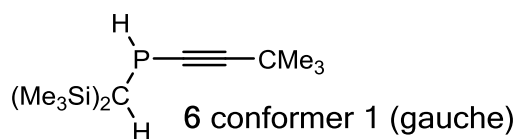

HF=-1433.6691491 au (0)

1\1\GINC-LUPUS08\FOpt\RTPSSSTPSS\def2TZVP\C13H29P1Si2\WURTHWE\26-May-20  
18\0\# TPSSTPSS/def2tzvp opt=readfc geom=check guess=read pop=nbo fre  
q nosym emp=gd3bj int=(grid=ultrafine,acc2e=11)\Alkynylphosphine conformer 1  
\0,1\C,-1.437957332,-3.3410339417,-1.8610668348\P,-0.71001781  
66,-2.2182515474,-3.006608696\C,-2.110028594,-1.0290080479,-3.37177537  
7\Si,-3.1020165546,-1.7250532562,-4.8391932841\C,-3.6927127075,-3.4768  
337932,-4.4848713157\C,-1.9139510069,-4.2255619571,-1.1720379816\C,-2.  
5070857973,-5.2648395041,-0.3261471552\C,-3.8008104164,-5.7827684623,-  
0.9973820857\C,-1.5037696562,-6.4305700411,-0.1674489121\C,-2.84339472  
42,-4.6729064424,1.0623100661\Si,-3.066526635,-0.3815990374,-1.8646130  
688\C,-1.9448531306,-0.2366955806,-0.3573811834\C,-3.7097393004,1.3475  
377012,-2.2699170372\C,-4.5198328401,-1.4989178586,-1.4269920232\C,-1.  
9744244494,-1.7473557821,-6.3494658753\C,-4.5872736199,-0.6280824506,-  
5.2279923221\H,-0.5775413548,-6.0825368009,0.2992640899\H,-1.258665771  
9,-6.8642645221,-1.1413392479\H,-1.9430522966,-7.2108304444,0.46454407  
44\H,-3.289822612,-5.4471440234,1.6967316767\H,-3.553248416,-3.8457350  
821,0.9683077953\H,-1.9393637295,-4.2981221362,1.5514201565\H,-4.24476  
89884,-6.5699042968,-0.3775782426\H,-3.5860934817,-6.193840071,-1.9879  
458371\H,-4.5305852544,-4.9754669579,-1.1096009043\H,-0.0091106601,-1.  
4403715595,-2.04473863\H,-1.5797798358,-0.159303614,-3.7990663254\H,-4  
.243860447,1.7703729127,-1.4097503878\H,-4.3991858535,1.3454611806,-3.  
1204463006\H,-2.8839008768,2.0283144137,-2.5111566051\H,-4.1713663668,  
-2.5140469945,-1.2149991826\H,-5.2613412876,-1.5542808016,-2.231550462  
7\H,-5.0294919961,-1.1192611701,-0.5325566384\H,-2.4996127528,0.214613  
7019,0.475169824\H,-1.0754804453,0.400737534,-0.5584345248\H,-1.580266  
5844,-1.2155185557,-0.0287590647\H,-2.4900774686,-2.1748301316,-7.2181  
934794\H,-1.075816486,-2.3459658392,-6.1623978057\H,-1.6520193181,-0.7  
342388641,-6.619697966\H,-4.2799798712,0.400888082,-5.4485074649\H,-5.  
3112877155,-0.5932879648,-4.4067984912\H,-5.1098429879,-1.0132592285,-  
6.1126886621\H,-4.3450979656,-3.5204100458,-3.6072365093\H,-2.85087338  
95,-4.1537113798,-4.3027365146\H,-4.254697205,-3.8621653392,-5.3449582  
836\Version=AS64L-G09RevD.01\HF=-1433.6691491\RMSD=3.659e-09\RMSF=1.3  
13e-06\Dipole=-0.4399104,-0.1096397,0.3237478\Quadrupole=0.2519567,2.9  
318642,-3.1838209,4.7334811,1.0752858,-4.2177598\PG=C01 [X(C13H29P1Si2  
)\@

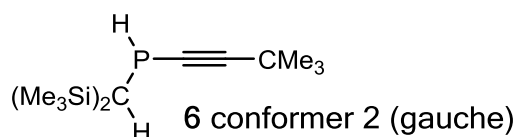

HF=-1433.666906 au (1, -18,38 cm<sup>-1</sup>)

1\1\GINC-LUPUS09\FOpt\RTPSSTPSS\def2TZVP\C13H29P1Si2\WURTHWE\28-May-2018\0\# TPSSTPSS\def2tzvp opt=(verytight) pop=nbo freq nosym emp=gd3bj int=(grid=ultrafine,acc2e=11)\ Alkynylphosphine conformer 2\0,1\C,-0.0012888882,-0.00662336 22,0.0124945267\Si,0.0380649075,0.1043747875,1.9070876912\C,1.8174894846,0.1551444684,2.5265345438\Si,-1.6625490028,0.298432919,-0.8564420905\C,-3.1085789062,-0.4648375807,0.083670685\P,1.2618987453,1.1869331423,-0.6843137565\C,2.7031583038,0.1799365232,-0.7718243812\C,3.748808179,-0.4424555393,-0.7185532528\C,4.9989295035,-1.2046190765,-0.6548857047\C,5.0419296819,-2.2319022318,-1.8095232012\C,-1.9719624921,2.1475870576,-1.0515826652\C,-1.5914507713,-0.5128132149,-2.5576143531\C,6.1987242051,-0.236436021,-0.7746833674\C,5.0652766381,-1.9451478106,0.7014300782\C,-0.7833540737,-1.423027221,2.6482013215\C,-0.8367082889,1.6710201191,2.4829533052\H,4.9897936498,-1.7262412723,-2.7782851092\H,4.2013004443,-2.9284756063,-1.7378356684\H,5.9762620424,-2.8030742705,-1.7623244926\H,7.1361737753,-0.8020495796,-0.7231442112\H,6.1856921318,0.4963823567,0.0373833691\H,6.1668878399,0.3018417465,-1.7265745243\H,5.9975769033,-2.5180264412,0.7618577164\H,4.2234454811,-2.6363719506,0.8063245738\H,5.03608863,-1.234398628,1.5324448952\H,0.9238732938,1.102775141,-2.0643269902\H,0.3019665544,-1.0254656536,-0.2707949585\H,-4.0346574969,-0.316612144,-0.4862507269\H,-3.2530482024,-0.0116563174,1.070327153\H,-2.9761765518,-1.5436769714,0.2239500453\H,-1.1788521829,2.6405402361,-1.6256360683\H,-2.0406099761,2.6525435561,-0.0823395039\H,-2.9164834072,2.3151065495,-1.5840839824\H,-2.5185461324,-0.3297798603,-3.1147186599\H,-1.4660672336,-1.5987341704,-2.468523578\H,-0.7604022423,-0.1305766963,-3.1607163116\H,1.8303762282,0.2227104381,3.6219290256\H,2.3657540877,1.017426507,2.130724333\H,2.3673951863,-0.745992382,2.2349160611\H,-0.2988907987,-2.3391680404,2.2886025017\H,-1.8481510361,-1.4902199275,2.4055508798\H,-0.6902102286,-1.409270155,3.7413340464\H,-1.9056871496,1.6641710227,2.2422977318\H,-0.3918132256,2.5577336531,2.0162240056\H,-0.742758551,1.7848270784,3.5697904033\Version=AS64L-G09RevD.01\HF=-1433.666906\RMSD=9.619e-09\RMSF=2.808e-07\Dipole=0.0772879,-0.5792768,0.0485571\Quadrupole=4.7286743,-3.147359,-1.5813152,-4.2421335,0.4587705,0.2003947\PG=C01 [X(C13H29P1Si2)]\@

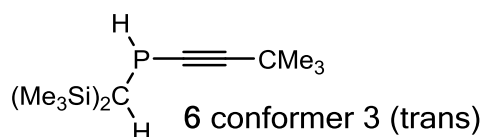

HF=-1433.6662067 au (1, -6,25 cm<sup>-1</sup>)

1\1\GINC-LUPUS08\FOpt\RTPSSTPSS\def2TZVP\C13H29P1Si2\WURTHWE\28-May-2018\0\# TPSSTPSS\def2tzvp opt=(verytight) pop=nbo freq nosym emp=gd3bj int=(grid=ultrafine,acc2e=11)\ Alkynylphosphine conformer 3\0,1\C,-0.0046830207,0.0010679614,0.0027973941\Si,0.0006264969,-0.0013107899,1.9074246424\C,1.7734279819,-0.0011592008,2.5487825502\P,1.152643031,1.3943314739,-0.4958467701\C,0.6081177498,1.804007832,-2.11735726\C,0.1711776169,2.2448454746,-3.1657789498\C,-0.3417577093,2.736836567,-4.4472014517\C,0.852234073,3.1208282867,-5.352372

0183\Si,0.2842453997,-1.6389534664,-0.9002632596\C,-1.2494758181,-2.72  
88054179,-0.7405654934\C,1.7733551141,-2.5246119106,-0.1532767766\C,0.  
6039281728,-1.3983458644,-2.740344398\C,-1.1727051734,1.6262874723,-5.  
1309647705\C,-1.2308641721,3.9787354984,-4.2065031367\C,-0.8704391543,  
1.5654922967,2.4873875671\C,-0.909489073,-1.4922733212,2.6189483636\H,  
-0.6580433456,4.7759013919,-3.7237708122\H,-2.0808664477,3.7271349596,  
-3.5651137221\H,-1.6131780942,4.3507127411,-5.1640223758\H,0.479089633  
6,3.4893919054,-6.3146741971\H,1.4937873583,2.2535243937,-5.5338730077  
\H,1.4542643673,3.9059459523,-4.8857264644\H,-1.561694616,1.9922680139  
,-6.0880383018\H,-2.0177539615,1.3322251385,-4.5009421324\H,-0.5560370  
074,0.7424760969,-5.3184520742\H,2.2801043365,0.6084007074,-0.86347175  
12\H,-1.003040338,0.3680229462,-0.2826755897\H,-0.9479549539,-1.411610  
2409,3.7127020291\H,-0.4140496831,-2.4387022553,2.3761877137\H,-1.9417  
967309,-1.5492587,2.2551370673\H,2.3312285537,0.867837327,2.179746376\H,  
2.3197120914,-0.9032821958,2.2540163169\H,1.7771108114,0.0480974847,  
3.6447347183\H,-0.8469638064,1.6490352499,3.5808229399\H,-1.9219932582  
,1.5731486956,2.1752930311\H,-0.3892269674,2.4578994175,2.0712437105\H  
,0.7666222682,-2.3777035002,-3.2091358272\H,1.4841438175,-0.7777862064  
,-2.9360966815\H,-0.2487250546,-0.92243486,-3.235233855\H,-2.131659642  
8,-2.2209259326,-1.1497819752\H,-1.4712788581,-2.9995557853,0.29606372  
72\H,-1.1143818885,-3.6588486411,-1.3069932313\H,1.6012968188,-2.81453  
85137,0.8893345016\H,2.6719900917,-1.8970476803,-0.1822038806\H,1.9922  
74187,-3.4385171782,-0.7189191309\Version=AS64L-G09RevD.01\HF=-1433.6  
662067\RMSD=1.814e-09\RMSF=2.068e-07\Dipole=-0.3635098,-0.1607584,-0.3  
956468\Quadrupole=-2.2186586,-2.7633239,4.9819825,-2.2008523,1.3155282  
,-3.6295626\PG=C01 [X(C13H29P1Si2)]\@

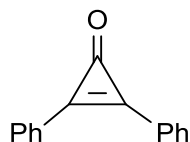

HF=-653.175601 au (0)

1\1\GINC-LUPUS06\FOpt\RTPSSTPSS\def2TZVP\C15H10O1\WURTHWE\28-Jan-2018\  
0\# tpsstps/def2tzvp Opt=(readfc,tight) Pop=NBO Freq emp=gd3bj geom=  
check guess=read\Diphenylcyclopropenone\0,1\C,-0.0056352119,-0.001565  
7067,0.5940328071\O,-0.0079683236,-0.0039818411,1.8124825781\C,0.47407  
49737,-0.493289098,-0.6618230283\C,-0.4805361753,0.4951380409,-0.66169  
09273\C,-2.2369968541,2.1983413273,-0.6823782177\C,-3.0775263541,3.080  
2808758,-1.3529073446\C,-3.0229770084,3.1762410343,-2.7453483827\C,-2.  
123453986,2.3873438709,-3.4678705818\C,-1.2843643318,1.5002562813,-2.8  
03148401\C,-1.3321991115,1.3934442542,-1.4008692889\C,2.2306149306,-2.  
1964102852,-0.6825381533\C,1.3285692514,-1.3886632177,-1.4012911987\C,  
1.2861058162,-1.4899127633,-2.8041557929\C,2.1277416809,-2.3743635367,  
-3.4691725731\C,3.0244971193,-3.1661267673,-2.7463452074\C,3.073712829  
7,-3.0756900392,-1.3533358607\H,-2.2652186416,2.1154215271,0.399882876  
8\H,-3.7748559818,3.6957822152,-0.7921600047\H,-3.67867866,3.866672310  
6,-3.2682198488\H,-2.0797116002,2.4666749948,-4.5503520311\H,-0.579265  
4809,0.8944198762,-3.3629134813\H,2.2546912431,-2.1177834749,0.4001434  
227\H,0.5831512172,-0.881855804,-3.3642099425\H,2.0881457004,-2.449400



7072,-4.5521197062\H,3.6822015998,-3.854483945,-3.2694358167\H,3.76889  
 45741,-3.6934156934,-0.7923675496\\Version=AS64L-G09RevD.01\State=1-A\  
 HF=-653.175601\RMSD=8.922e-09\RMSF=8.239e-07\Dipole=0.0038413,0.003978  
 ,-2.0060879\Quadrupole=4.2619032,4.3347405,-8.5966438,-10.6174612,0.00  
 35679,0.0053119\PG=C02 [C2(C1O1),X(C14H10)]\\@

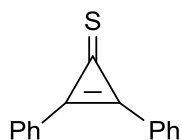

HF=-976.1413538 au (0)

1\1\GINC-LUPUS08\FOpt\RTPSS\def2TZVP\C15H10S1\WURTHWE\28-Jan-2018\  
 0\#\# tpsstps/def2tzvp Opt=(readfc,tight) geom=check guess=read Pop=NB  
 O Freq emp=gd3bj\Diphenylcyclopropenethione\\0,1\C,0.1044527617,-0.242  
 0114617,-0.086289566\C,0.0517284949,-0.1070841886,1.3253831193\C,1.255  
 1898861,-0.3909491493,0.6290308237\S,-0.774105869,0.1682359801,2.71122  
 89749\C,-0.6279387371,-0.216184562,-1.3191337698\C,-2.0113615056,0.043  
 9456021,-1.2656058496\C,-2.7586570941,0.0779093986,-2.4377546866\C,-2.  
 1385171782,-0.1458392399,-3.6693891589\C,-0.7656461293,-0.4047269023,-  
 3.7308007868\C,-0.0115000061,-0.4404412894,-2.5641810472\C,3.252794719  
 6,-0.6374985867,2.0067165501\C,2.6638126711,-0.6422207625,0.7270801383  
 \C,3.4634069658,-0.8900452452,-0.4041415577\C,4.8244308469,-1.12808298  
 11,-0.2559338863\C,5.4017082788,-1.1217339769,1.0177535072\C,4.6154792  
 737,-0.8766231296,2.1461705668\H,-2.4738316783,0.2151529069,-0.2980900  
 297\H,-3.8250510881,0.2786122937,-2.3944308934\H,-2.7241973269,-0.1188  
 535397,-4.5838857381\H,-0.2883233815,-0.5780237774,-4.6909005473\H,1.0  
 545641269,-0.6409691329,-2.6060652264\H,2.6238303666,-0.444840176,2.87  
 07559389\H,3.0100933703,-0.8937976346,-1.390524415\H,5.4401236233,-1.3  
 19178847,-1.1300420889\H,6.4660757607,-1.308306156,1.128956704\H,5.067  
 6946508,-0.872570006,3.1335102133\\Version=AS64L-G09RevD.01\State=1-A\  
 HF=-976.1413538\RMSD=7.473e-09\RMSF=1.001e-07\Dipole=1.1689863,-0.3897  
 215,-1.9616947\Quadrupole=8.735549,-7.2166511,-1.5188979,-2.0726886,10  
 .368284,-1.3853259\PG=C01 [X(C15H10S1)]\\@

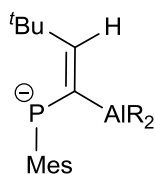

**3-anion:** R = CH(SiMe<sub>3</sub>)<sub>2</sub>

HF=-2883.5883187au (0)

1\1\GINC-PALMA316\FOpt\RTPSS\def2TZVP\C29H59Al1P1Si4(1-)\WURTHWE\1  
 6-Mar-2018\0\#\# tpsstps/def2tzvp opt=(gdiis,maxstep=2) int=(Acc2e=11,  
 grid=ultrafine) freq pop=nbo emp=gd3bj geom=check guess=read\  
 FLP: Anion\\-1,1\C,4.3487194902,1.5653635989,1.5778149  
 078\C,4.785241567,0.6493036754,0.6118413832\C,4.0647980204,-0.50006789

31,0.3001710112\C,2.8117209856,-0.7748810671,0.9317367426\C,2.44117881  
34,0.0846419641,2.0153563595\C,3.196836749,1.2318013384,2.2906929087\P  
,1.9053234247,-2.2864852757,0.4758160902\C,0.1890410034,-1.7611553428,  
0.6738804412\C,-0.8837604942,-2.5537650641,0.9967036322\C,-0.903369249  
6,-4.0180096149,1.4445071215\C,-0.3063226308,-4.9451515588,0.367561851  
8\C,4.6423621389,-1.4735584218,-0.6948688946\C,1.3692893236,-0.3070474  
353,3.0082422872\C,5.0940651041,2.8496245771,1.8402062018\A1,-0.557035  
7643,-0.1333488907,-0.1128950269\C,-2.0218669551,0.7104623928,0.961866  
3325\Si,-1.7148913525,2.2421446684,2.0053977908\C,-2.0457013644,1.7750  
600669,3.8105598928\Si,-3.6900340107,0.5921207606,0.1298448012\C,-4.00  
42137265,1.9235019343,-1.1767594599\C,-5.098228949,0.6729893249,1.4006  
52501\C,-3.9042009622,-1.0658934969,-0.7584120127\C,-0.4325278994,0.42  
30277662,-2.0165825366\Si,-0.0307326504,-0.9551036919,-3.230648987\C,-  
0.7815412012,-0.542547946,-4.9271727075\Si,0.5037074433,2.0286648565,-  
2.2625656965\C,0.9743512368,2.4175234906,-4.0612587963\C,2.0959251707,  
2.0568879395,-1.2661577426\C,-0.6251382751,3.4651890958,-1.7588950436\  
C,1.8229209,-1.219303592,-3.385646195\C,-0.7742785899,-2.6168852443,-2  
.738225947\C,0.0393204785,2.9263837334,1.8986878458\C,-2.8376316559,3.  
7258887679,1.6215031496\C,-0.0906583018,-4.1653061742,2.7484790728\C,-  
2.3606165605,-4.4346253438,1.7080706309\H,-1.4860037208,0.6933424938,-  
2.2190319949\H,-2.073003428,-0.0774698516,1.740806503\H,0.2014919663,3  
.6649708185,2.6954439793\H,0.2269948492,3.4295963948,0.9448282556\H,0.  
8010846012,2.149202822,2.0121710395\H,-3.9055873191,3.4913087774,1.686  
8753452\H,-2.6457809407,4.1474538854,0.6286586747\H,-2.6267258814,4.51  
55216265,2.3556598536\H,-3.0794412245,1.4317933429,3.9425729713\H,-1.8  
829825766,2.6259693543,4.4846742803\H,-1.382332561,0.9622900923,4.1292  
029051\H,-3.1153641043,-1.2412818832,-1.4990206564\H,-4.8658317759,-1.  
0902647341,-1.2888067411\H,-3.8843775812,-1.9104216605,-0.0607917413\H  
,-3.9638474644,2.9378690426,-0.7697907901\H,-5.0014990527,1.7753252206  
,-1.6119548671\H,-3.2769793946,1.8660678698,-1.9938612181\H,-4.9881335  
448,-0.1303348426,2.1401444334\H,-6.0758138972,0.5475286728,0.91637667  
13\H,-5.115345838,1.6226231733,1.9471909264\H,1.9433581299,1.878319532  
7,-0.195232249\H,2.607743192,3.0228152117,-1.3678826358\H,2.7849056038  
,1.2770714493,-1.6069028724\H,-1.4124978766,3.6111609488,-2.5091938631  
\H,-0.0660240125,4.4059368431,-1.6749988601\H,-1.1214175339,3.28272568  
31,-0.8018181266\H,1.6242835569,1.6569832124,-4.5069737655\H,1.5139837  
575,3.3741143439,-4.0923438217\H,0.087093423,2.5170669341,-4.697808935  
7\H,2.3809295863,-0.309338099,-3.6304595153\H,2.0504857959,-1.97515515  
28,-4.1482456917\H,2.1755654104,-1.5945363471,-2.4154688024\H,-1.87031  
11025,-2.5974833683,-2.7073899446\H,-0.4106162107,-2.924037763,-1.7528  
943316\H,-0.4778937756,-3.3844865298,-3.4660549578\H,-1.8617628548,-0.  
365129741,-4.839598908\H,-0.641555844,-1.383297412,-5.6198798971\H,-0.  
3342247873,0.3460459264,-5.3839074865\H,-1.8876353839,-2.1117056261,0.  
9751467217\H,0.9380795304,-3.8252498333,2.5844676529\H,-0.0709891176,-  
5.215146842,3.0739473876\H,-0.5360182212,-3.5608447443,3.5474093757\H,  
-2.8154851935,-3.79373719,2.4742688656\H,-2.4136164467,-5.4742723707,2  
.0559779728\H,-2.9605623738,-4.3486561233,0.7930338413\H,-0.8928243468  
,-4.8923833785,-0.5566519414\H,-0.3053985015,-5.9873315186,0.718511326  
\H,0.7240446439,-4.6531565292,0.1392060396\H,3.9328732917,-1.691728363  
2,-1.4999155154\H,4.858573375,-2.4376811137,-0.2150768648\H,5.57154635  
5,-1.0828650844,-1.1261132883\H,5.7167559555,0.841573828,0.0771088333\

H,4.8811621042,3.2316796226,2.8455628747\H,4.8064364335,3.6351058249,1.1254133883\H,6.1788555148,2.7122712351,1.7498250613\H,2.8899154268,1.8696181481,3.1209589372\H,1.4535300762,-1.380402272,3.2204406309\H,0.3434104845,-0.1630197312,2.6536000182\H,1.4927931137,0.2651764647,3.9362101126\\Version=EM64L-G09RevD.01\State=1-A\HF=-2883.5883187\RMSD=8.835e-09\RMSF=1.720e-06\Dipole=-1.6727264,1.7459572,-0.536687\Quadrupole=-4.2331517,-1.3346885,5.5678402,5.9606244,-3.1057568,3.3734893\PG=C01[X(C29H59Al1P1Si4)]\@

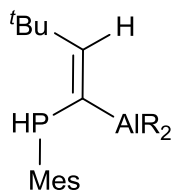

3: R = CH(SiMe<sub>3</sub>)<sub>2</sub>

HF=-2884.1497184 au (0)

1\1\GINC-LUPUS08\FOpt\RTPSS\def2TZVP\C29H60Al1P1Si4\WURTHWE\02-Feb-2018\0\#\ tpsstps\def2tzvp Opt=readfc int=(Acc2e=11,grid=ultrafine) Pop=NBO Freq=norman emp=gd3bj geom=check guess=read\C36H65AlNPSi4 FL P from X-Ray\0,1\C,0.1908799651,0.311735667,-0.3013443232\C,-0.3009285348,-0.2529676543,3.0578942227\C,1.864303632,-0.3443979901,5.2782015232\Si,1.5295220637,-0.0713633995,3.4374088417\Si,-0.3370452348,-1.2693793435,-1.1783615735\Si,0.4094097916,1.8414345712,-1.3789146383\Al,-0.8383155912,0.5805448452,1.3557794274\Si,-1.1143712594,-1.8810071606,3.5626818248\C,-2.461629314,-2.4193701686,2.3559415506\C,0.0678320235,-3.3479917817,3.7228953443\C,-1.9088384573,-1.6126831486,5.2552888267\C,2.0946013222,1.6910124122,3.043164426\C,2.6246432199,-1.23470623,2.4352426031\C,-2.2176812982,-1.3824860632,-1.2456119479\C,0.3734785143,-2.7390775561,-0.2304991561\C,0.2708390247,-1.4454991991,-2.9586543194\C,-1.1617075074,2.2034236046,-2.3517153552\C,0.8427463189,3.3679410458,-0.3529029879\C,1.8615498611,1.626928792,-2.5710047327\C,-2.157768176,2.039272316,1.6082527814\P,-3.6737033796,2.3858824829,0.6754340142\C,-1.5007378916,2.9114499836,2.4157166707\C,-1.814368058,4.3433060789,2.8571985037\C,-2.9520765587,4.3281360789,3.9011123446\C,-0.5488328828,4.9239690832,3.5174707233\C,-2.1962936281,5.2430007102,1.6668182926\C,-4.6684052998,0.839719359,0.8269130356\C,-5.1775431355,0.2655665195,-0.3597159851\C,-4.9946496391,0.2541586422,2.0737359314\C,-4.9751012943,0.9020612609,-1.7153881804\C,-5.932336775,-0.9092834846,-0.2839912778\C,-5.7631114386,-0.9118804858,2.1027168478\C,-4.5634940327,0.8676231516,3.3798774729\C,-6.2236518938,-1.5229873291,0.9342527883\C,-6.99417513,-2.8176716064,0.990679662\H,-4.4040953509,3.1503792479,1.6211322857\H,1.1980369148,0.0819016113,0.0932947658\H,-0.7824804823,0.4583352558,3.7569203482\H,-3.0369418478,-3.2548386215,2.775634799\H,-2.0438107355,-2.7628633962,1.4037429633\H,-3.1762416055,-1.6176364057,2.139570298\H,0.8786534829,-3.1643372711,4.4355972986\H,0.519387528,-3.6363209666,2.7680133427\H,-0.500607716,-4.2134945335,4.0878234812\H,-1.1554739438,-1.3374511299,6.0030977364\H,-2.4152234409,-2.5196181499,5.6081452907\H,-

2.6515408995,-0.807079873,5.2214509482\H,1.8965551322,1.9670359913,2.000249675\H,3.1752591733,1.7932915235,3.2050314723\H,1.5974357231,2.4326489817,3.6794472857\H,2.402252831,-2.2892152772,2.6213884499\H,3.6755970101,-1.0637210985,2.700815501\H,2.5270622615,-1.0610281472,1.3581692955\H,1.2731404011,0.3512950276,5.8866345991\H,2.922434334,-0.1727862628,5.5125857704\H,1.6136860676,-1.3601998982,5.6027907587\H,-2.7088805324,-1.198267588,-0.2832340118\H,-2.5397923959,-2.3751715942,-1.5833754405\H,-2.6175518037,-0.6496006281,-1.954020274\H,1.462747671,-2.7825344757,-0.3505442716\H,-0.039457383,-3.6874053632,-0.5955856745\H,0.1696551293,-2.6760499086,0.8423879726\H,-0.1124995654,-0.6564082228,-3.6147751727\H,-0.0763917323,-2.4060465998,-3.3617191998\H,1.364527339,-1.4358284516,-3.0216716824\H,-1.4573768812,1.3578301165,-2.9837553979\H,-1.0169943116,3.0704158017,-3.0080060945\H,-1.9967913724,2.4344527943,-1.6789256236\H,1.8210703117,3.2610446509,0.1310565358\H,0.1003759492,3.5695522789,0.4250731605\H,0.8960009335,4.2511922595,-1.0023877177\H,2.7685835504,1.3277375313,-2.0306218717\H,2.0774251433,2.580312608,-3.0702165034\H,1.6745017998,0.8795261353,-3.3469354204\H,-0.5576655515,2.5618866068,2.8614195512\H,-3.8807174844,3.9434790937,3.4715203884\H,-3.1386064084,5.3456064171,4.265509355\H,-2.6855475269,3.6991301731,4.7571055169\H,-0.2543833895,4.327071638,4.3888924948\H,-0.7278740124,5.9511806626,3.8534048311\H,0.2896361406,4.9344505187,2.811941338\H,-1.3796634024,5.2898037176,0.9396922522\H,-2.3985888836,6.2603460514,2.022455744\H,-3.0889695342,4.886910614,1.1454709874\H,-3.9424215463,1.2198728328,-1.8743115912\H,-5.5973086579,1.7994449082,-1.8181707517\H,-5.2556012507,0.2026218565,-2.5084426565\H,-6.3038144061,-1.3530552059,-1.2059392965\H,-7.6533008376,-2.8504880306,1.8642149401\H,-6.3076520016,-3.6709334854,1.0659179204\H,-7.6010439719,-2.9586730669,0.091334227\H,-5.9992407827,-1.3587097837,3.0670805955\H,-4.9995872665,1.8660410511,3.5038209452\H,-3.4777294414,0.9959723803,3.4269804821\H,-4.8854833871,0.2468942579,4.2204386839\Version=AS64L-G09RevD.01\State=1-A\HF=-2884.1497184\RMSD=6.552e-09\RMSF=7.276e-07\Dipole=-0.3326827,-0.2411269,0.2893473\Quadrupole=0.3699101,1.5949545,-1.9648646,4.7121208,0.6950535,3.5206023\PG=C01 [X(C29H60A11P1Si4)]\@

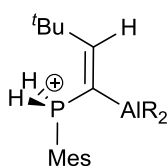

3-protonated: R = CH(SiMe<sub>3</sub>)<sub>2</sub>

HF=-2884.5463282 au (0)

1\1\GINC-PALMA297\FOpt\RTPSSTPSS\def2TZVP\C29H61A11P1Si4(1+)\WURTHWE\20-Mar-2018\0\#\ tpsstps/def2tzvp opt=(gdiis,maxstep=2) int=(Acc2e=11, grid=ultrafine) freq pop=nbo emp=gd3bj geom=check guess=read\ FLP from X-Ray: P-protonated\1,1\C,4.6358342534,2.038536988,0.7508729525\C,4.7992357597,0.951521092,-0.1132106966\C,3.9921585303,-0.1832928301,-0.0476288976\C,2.9552527002,-0.2067581416,0.9220702287\C,2.8088473046,0.850759197,1.8540358761\C,3.653184586,1.9530142637,1.740613

5946P,1.8654754813,-1.6259922831,1.0028712061\C,0.1326192797,-1.28265  
63622,1.060000492\C,-0.7220969736,-1.8261791598,1.9615926799\C,-0.5594  
318843,-2.8387552103,3.0932581996\C,-0.0841509308,-4.1908317963,2.5138  
062944\C,4.2975872317,-1.3367692805,-0.9732350696\C,1.8299812949,0.796  
3403514,2.9974558786\C,5.4869539843,3.2701860494,0.6129916473\Al,-0.82  
57464925,-0.0768981519,-0.2672385856\C,-1.0097617786,1.7529992577,0.37  
61378623\Si,-0.009619143,3.2552726259,-0.2075776756\C,0.5571892194,4.1  
699210238,1.3421426111\Si,-2.8644270027,2.0527643418,0.6276931274\C,-3  
.7855700089,2.3458380198,-0.986204334\C,-3.1716273048,3.4833403005,1.8  
122771006\C,-3.588941894,0.4920303882,1.4239885949\C,-1.7616630301,-0.  
9308199676,-1.7615001209\Si,-2.1890866832,-2.7638597907,-1.6787572063\  
C,-3.1680843297,-3.2967277889,-3.196435875\Si,-0.634485219,-0.40625460  
35,-3.1773754108\C,-0.6001945117,-1.4677687691,-4.7273547932\C,1.11169  
96399,-0.5018594578,-2.4223982211\C,-1.039602577,1.3603401043,-3.66740  
81305\C,-0.610365772,-3.795870109,-1.5486217364\C,-3.2957409144,-3.156  
9707802,-0.201611291\C,1.5263546187,2.7883657006,-1.2004539692\C,-0.99  
08717956,4.4790369591,-1.252436364\C,0.4119519501,-2.3447816514,4.1857  
782925\C,-1.9426628525,-3.0445435613,3.7447946639\H,2.3238268628,-2.49  
39882798,2.007947459\H,-2.716357593,-0.3952403023,-1.8877313177\H,-0.6  
363056692,1.6212232584,1.4102994782\H,2.1501547493,3.679282642,-1.3465  
751982\H,1.2745405865,2.4049161303,-2.1944485007\H,2.1421773578,2.0396  
141499,-0.6908945686\H,-1.8538663398,4.886940736,-0.7157880806\H,-1.34  
99724942,4.0607319859,-2.1977604812\H,-0.3346991819,5.3231312304,-1.50  
04720429\H,-0.2960544091,4.5104440067,1.9390296616\H,1.1530557319,5.05  
25090692,1.080169823\H,1.1756642605,3.5313986252,1.9820083364\H,-3.455  
6684143,-0.4029084241,0.797795081\H,-4.6697302535,0.5978652178,1.57823  
73549\H,-3.1390311482,0.2933914664,2.4047833393\H,-3.4873030984,3.2773  
730839,-1.4750277434\H,-4.8615921663,2.4097242439,-0.7827811673\H,-3.6  
372456599,1.5326789998,-1.7046511328\H,-2.661663937,3.3233049732,2.769  
6984494\H,-4.2439649886,3.5826599216,2.0202846252\H,-2.8258865115,4.44  
01832649,1.4068087444\H,1.2438274102,0.0624443723,-1.4783890892\H,1.88  
48367147,-0.1033827232,-3.0887536314\H,1.3439954398,-1.5543992166,-2.2  
197392996\H,-2.0186087096,1.4005843043,-4.1598727043\H,-0.3000593552,1  
.7718157787,-4.3639618591\H,-1.0879182693,2.0205131184,-2.7961630667\H  
,-0.3378442982,-2.5118232423,-4.5282478858\H,0.1479825064,-1.063441592  
8,-5.421143323\H,-1.566525028,-1.4545867964,-5.2423820176\H,0.04781575  
13,-3.6550775427,-2.4137313663\H,-0.8510895184,-4.864210987,-1.4961209  
579\H,-0.0440930882,-3.544516137,-0.6442263373\H,-4.2174673705,-2.5636  
140078,-0.2284310591\H,-2.8147262176,-2.9791273974,0.7644161623\H,-3.5  
895935869,-4.2136178573,-0.2294722068\H,-4.0500211278,-2.6592270644,-3  
.3340718679\H,-3.5261891298,-4.3257430182,-3.0688810644\H,-2.584917271  
9,-3.2620970056,-4.1204690313\H,-1.7645958843,-1.5110800482,1.85344264  
2\H,1.4380762452,-2.236817029,3.8244137647\H,0.4281794905,-3.070850327  
2,5.0048454797\H,0.0880449473,-1.3819260937,4.5918335051\H,-2.31925961  
89,-2.1070568111,4.1681324935\H,-1.8741477017,-3.7791741028,4.55247063  
82\H,-2.6726082781,-3.4091458021,3.0147357188\H,-0.7807681259,-4.55542  
16117,1.7534504882\H,-0.0299795895,-4.9336264025,3.3163359372\H,0.9085  
069575,-4.1210646866,2.0565625196\H,3.4775396435,-1.538162018,-1.66983  
60986\H,4.5052418943,-2.2582754749,-0.4167447783\H,5.183911114,-1.1079  
615491,-1.5683485981\H,5.589809381,0.980902974,-0.8588475054\H,5.61733  
66038,3.7742590197,1.5742457025\H,5.004792199,3.9806357896,-0.07071108

51\H,6.4709971444,3.0318493684,0.2007499169\H,3.5411328653,2.768100145  
2,2.4508664918\H,2.1357345616,0.0407737245,3.7305381832\H,0.8191028572  
,0.5431508688,2.6669758751\H,1.7920499487,1.75795566,3.5131726808\H,2.  
1135600679,-2.3640222462,-0.1579002819\\Version=EM64L-G09RevD.01\State  
=1-A\HF=-2884.5463282\RMSD=6.989e-09\RMSF=1.076e-06\Dipole=2.1563611,-  
0.9768595,1.099732\Quadrupole=8.278579,-3.162348,-5.116231,4.5504875,1  
.0345111,-4.7790723\PG=C01 [X(C29H61A11P1Si4)]\@

## Adducts

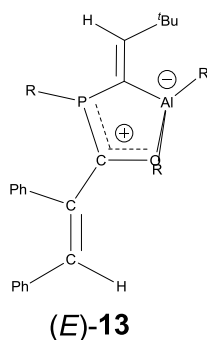

HF = -4045.1585917 au (0)

```
1\1\GINC-PALMA269\FOpt\RTPSSTPSS\def2TZVP\C42H78Al1O1P1Si6\WURTHWE\30-
Jan-2018\0\# tpsstps/def2tzvp Opt=(readfc,maxstep=7) Pop=NBO Freq em
p=gd3bj geom=check guess=read\((E)-FLP-propenone-adduct\0,1\C,0.0130773017,0
.0428681604,0.0398593193\C,0.0003086015,0.009709747,1.450208662\C,1.23
94439921,-0.0070945764,2.1243752608\C,2.4322633032,0.0335933237,1.4128
474475\C,2.4249581266,0.0984487347,0.0165639225\C,1.208589015,0.099179
7149,-0.6681676616\C,-1.2937356321,-0.0603839892,2.1078978324\C,-1.643
246582,0.235903467,3.3941343822\C,-0.7179760806,0.8026592897,4.4066434
609\C,-0.4119449615,0.073908189,5.5658896113\C,0.4626633386,0.59737820
72,6.5172906605\C,1.0303565332,1.8586359351,6.3303968575\C,0.726224839
1,2.5926455926,5.1820891884\C,-0.1355994522,2.0646498762,4.2234324934\C,
-3.0285971958,-0.0092716258,3.7779849985\O,-3.7464916646,-0.79514273
92,3.0385345117\Al,-5.4807263333,-1.3348263182,3.5430162444\C,-5.44737
29336,-0.0530541927,5.1526454376\P,-3.7430527709,0.4199166626,5.333101
7675\C,-3.2968793277,1.9996572661,6.1361788232\Si,-3.9313504177,3.5987
070193,5.3097420065\C,-2.922240138,5.0089674624,6.0559597597\C,-6.6065
781307,-0.9527922962,1.9247396018\Si,-6.4730032244,0.7761490637,1.2143
102072\C,-7.0458614232,2.0629952527,2.4689676715\C,-5.1615601761,-3.28
37707684,3.8883527914\Si,-4.5209029452,-3.810443095,5.5710763112\C,-5.
6938943953,-3.2711075109,6.9493588074\Si,-8.292110287,-1.7496586828,1.
6832424681\C,-9.7398342351,-0.5932652441,2.0827249692\C,-8.5525732228,
-3.3468022993,2.6668858293\C,-8.4943391368,-2.2878103894,-0.121537552\
Si,-4.2428587463,-4.137130253,2.4769664182\C,-2.3814494398,-4.27097689
33,2.7931519319\C,-4.3482507184,-3.3065702776,0.7754518989\C,-4.944073
7256,-5.8738246832,2.20269067\C,-4.3711517754,-5.6933404432,5.73637232
1\C,-2.8358993845,-3.0842688892,6.0252716664\C,-6.3112357923,0.4236643
034,6.0804621089\C,-7.7746529364,0.0844844336,6.2584440295\C,-8.003802
9504,-0.2973756962,7.7390241656\C,-8.1905123472,-1.0683292734,5.349136
0519\C,-8.6248656584,1.3376392417,5.948247723\Si,-3.3830171929,1.86128
53039,8.0532702233\C,-4.8397961954,2.775247465,8.8248840273\C,-3.44709
62295,0.0482625634,8.5509224029\C,-1.8160346901,2.6427226095,8.7440046
567\C,-3.602904044,3.5218090102,3.4634157976\C,-5.7577537906,3.9280454
171,5.5916029012\C,-4.6975514401,1.1479393599,0.670279879\C,-7.4701967
543,1.0744406015,-0.3723054797\H,-5.9946762251,-1.5429108716,1.2174844
095\H,-4.6470472407,2.1284403513,0.1799771135\H,-3.9746871043,1.143261
7525,1.4882630657\H,-8.549069607,0.9299160583,-0.2563451304\H,-7.13112
4708,0.4200505134,-1.1842357817\H,-7.3117822219,2.1106676019,-0.700324
```

9185\H,-7.8314773248,-4.1147040126,2.3639623952\H,-9.5554921447,-3.740  
6793305,2.4554933101\H,-8.4701470802,-3.2201284393,3.7504198322\H,-8.4  
839730525,-1.4442479343,-0.8179989098\H,-9.443614702,-2.822037075,-0.2  
567073521\H,-7.688931624,-2.971945947,-0.4171920226\H,-9.7668572099,-0  
.2784345275,3.1301366967\H,-10.685040741,-1.1094359366,1.8707075974\H,  
-9.7177741826,0.3121673358,1.4668160562\H,-6.17583555,-3.7200031759,3.  
8542583154\H,-5.361508278,-3.3165725653,0.359761372\H,-3.7088738973,-3  
.8719580985,0.0841900131\H,-3.9885766802,-2.2721469721,0.7873225298\H,  
-6.0062973904,-5.8224200601,1.9315749021\H,-4.8624901933,-6.5059391461  
,3.0921765934\H,-4.4204342239,-6.3792679564,1.381111146\H,-1.899847935  
, -4.7319995019,1.9213106634\H,-2.1317813469,-4.8802774141,3.6674600314  
\H,-1.9345580284,-3.2792866444,2.9309031685\H,-5.3244508575,-6.1900996  
691,5.5187337246\H,-4.088325004,-5.9560824872,6.7641165071\H,-3.614996  
8293,-6.12044711,5.0684570145\H,-2.0486799919,-3.3418651238,5.31144869  
34\H,-2.5333975208,-3.4602847021,7.0112830794\H,-2.8924138506,-1.99129  
60436,6.0898136358\H,-5.7711280802,-2.1797071341,6.9735625919\H,-5.319  
4852214,-3.6066501194,7.924779239\H,-6.7020046859,-3.6828640925,6.8207  
058221\H,-5.9646349431,1.1437276109,6.8295064666\H,-8.0120155959,-0.80  
88085102,4.3015136621\H,-9.2567307315,-1.2925767778,5.4601792516\H,-7.  
623125968,-1.9734456037,5.5828803071\H,-8.5097580249,1.6395417126,4.90  
41700863\H,-8.3279936335,2.1790227603,6.5840803704\H,-9.6841853402,1.1  
262855248,6.1359238025\H,-9.0673184476,-0.4982767647,7.9132413053\H,-7  
.7007213206,0.5202931379,8.4036200206\H,-7.4354440925,-1.1912877951,8.  
0110247953\H,-2.208552871,2.0448542031,5.9697979592\H,-2.5846199532,-0  
.5014310575,8.1576968845\H,-4.3506454563,-0.4515131423,8.1830031373\H,  
-3.4368588709,-0.0442439823,9.6443764815\H,-1.816323877,2.582389125,9.  
8393449408\H,-1.730133726,3.6993709511,8.4687172377\H,-0.9222936811,2.  
1293280093,8.3763895285\H,-5.8169158186,2.407257213,8.4980452349\H,-4.  
7988780831,3.8512079563,8.624156902\H,-4.7876350302,2.6441114763,9.913  
4369018\H,-4.2059824027,2.7508656656,2.9770502141\H,-2.5516046499,3.31  
16083696,3.243583848\H,-3.8582543547,4.4811004819,2.9963036218\H,-6.00  
76395145,4.0359665599,6.6507406514\H,-6.3817051273,3.1345028367,5.1737  
612339\H,-6.0333606739,4.86272306,5.0866162931\H,-3.1463789157,5.94896  
02186,5.5367063747\H,-1.8457915721,4.8231181334,5.962107737\H,-3.14634  
09683,5.1597840992,7.1180219793\H,-0.8544611125,-0.907130953,5.7096049  
852\H,0.6982841841,0.0194208565,7.4065096691\H,1.7045108557,2.26933140  
42,7.0764321862\H,1.1638984388,3.5754380714,5.0316497707\H,-0.35895890  
33,2.6243104402,3.320384733\H,-2.1114895766,-0.3938005334,1.4729016622  
\H,1.2661283543,-0.075950092,3.205100842\H,3.3765441878,0.0081143042,1  
.9494845293\H,3.3612280204,0.1347112318,-0.5329987185\H,1.19307584,0.1  
349434572,-1.7537025203\H,-0.9350601119,0.0329811261,-0.4920705751\H,-  
6.8349003415,3.0857693708,2.1348747765\H,-6.5561355245,1.9091443858,3.  
4356953149\H,-4.3697755899,0.3969894155,-0.0604333965\H,-8.1270227957,  
1.9833801971,2.6316834455\\Version=EM64L-G09RevD.01\State=1-A\HF=-4045  
.1585917\RMSD=3.521e-09\RMSF=1.898e-06\Dipole=1.9122555,1.9634074,1.10  
349\Quadrupole=8.390769,-10.8319726,2.4412036,4.4105834,-6.8421787,2.5  
886983\PG=C01 [X(C42H78Al1O1P1Si6)]\@



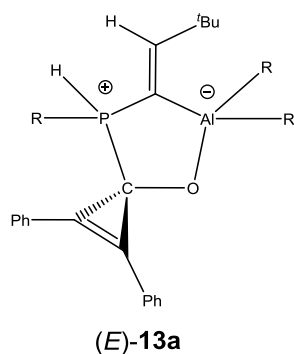

HF = -4045.1021854 au (0)

```

I\1\GINC-PALMA290\FOpt\RTPSSTPSS\def2TZVP\C42H78Al1O1P1Si6\WURTHWE\02-
Feb-2018\0\#\ tpsstps\def2tzvp Opt=(readfc,maxstep=12) Pop=NBO Freq e
mp=gd3bj geom=check guess=read\|(E)-FLP-cyclopropenone-adduct\|0,1\C,0.1984
047346,-0.1006588159,0.4817242207\C,0.1559353952,-0.1267941321,1.88914
41828\C,1.3636199308,-0.1415469795,2.6060301386\C,2.5805181954,-0.1278
064008,1.9316680724\C,2.6144487763,-0.0856499448,0.5364099338\C,1.4184
011794,-0.0714436032,-0.1858266946\C,-1.1163147183,-0.1201298296,2.567
4160781\C,-2.3807727278,-0.508583884,2.5855383348\C,-3.4856111052,-1.2
354364956,2.0237459992\C,-4.6917300247,-1.3158169527,2.7399671007\C,-5
.785362655,-1.9908762214,2.2094666871\C,-5.6913090443,-2.5928414725,0.
9532542799\C,-4.4948856573,-2.5223262808,0.2325670173\C,-3.3971233253,
-1.8523684045,0.7608751122\C,-1.9168024933,0.2520039603,3.7862590608\O
,-1.7640132099,-0.3095013215,5.0333126466\Al,-2.0828416883,0.555668971
7,6.6068819551\C,-2.1577185863,2.4343676665,5.6602866137\P,-2.60322840
66,1.9339658909,4.0171697587\C,-2.4814830928,2.9396414232,2.5175225286
\Si,-4.2111786048,3.6573257447,2.1094991854\C,-4.1600990031,4.72595167
21,0.5593906607\C,-3.8259460733,-0.0570492676,7.3943595698\Si,-3.98640
8747,-1.9382360245,7.419405557\C,-4.3598137436,-2.5391203142,9.1760798
387\C,-0.5018818151,0.4722758266,7.858587551\Si,-0.6469089343,0.022685
298,9.6758114484\C,-0.3937440959,-1.8242090982,9.9861422858\Si,-5.4550
159265,0.8360860281,7.2110905599\C,-6.3039454817,0.6705648797,5.524685
354\C,-6.7158172657,0.2265535804,8.4881315341\C,-5.294965271,2.6972134
52,7.5088022442\C,-2.4238237682,-2.827700069,6.847882886\C,-5.36897446
81,-2.6160823557,6.3167551853\Si,1.0779397308,-0.0983873712,7.01715712
83\C,1.5273358132,1.2814026368,5.8035962902\C,0.9623432494,-1.75535483
34,6.1238071893\C,2.5981030411,-0.2521475518,8.141790267\C,0.648592322
2,0.9729015591,10.68585077\C,-2.2724240462,0.5253143958,10.5205231752\C,
-1.9776726024,3.7586637727,5.8491614785\C,-1.7154751671,4.5546010313
,7.109872556\C,-2.7459735321,5.7093703663,7.1281486846\C,-1.8333814974
,3.7439243553,8.4036346942\C,-0.2979783192,5.1624348981,6.9973741683\Si,
-0.981592327,4.1062877797,2.2463710185\C,-1.350854326,5.8976523284,2.
7112459741\C,0.5389823431,3.5474279525,3.1837269099\C,-0.6083736195,3.
9978964472,0.4038270537\C,-5.3821627627,2.2332124888,1.7293173238\C,-
4.8138139606,4.6424336232,3.591526739\H,-3.6023603806,0.1716669839,8.4
527672668\H,-6.3233697169,0.3335948189,9.5068458059\H,-6.9778712607,-0
.8279612377,8.346166803\H,-7.6441934307,0.8093938474,8.4275061732\H,-4
.9510831673,2.9161630655,8.5265811664\H,-6.267645937,3.1889715066,7.37
8000565\H,-4.5854002251,3.1547654895,6.811887945\H,-6.5056180882,-0.36
88544997,5.2513027239\H,-5.7228432326,1.1253103565,4.7147555985\H,-7.2

```

664332698,1.197069744,5.5579265267\H,-2.266151782,-2.7020231542,5.7724  
652374\H,-2.5010156232,-3.901102978,7.0645190147\H,-1.5263632643,-2.45  
39863282,7.349793535\H,-5.1996823533,-2.3880255326,5.2597044587\H,-6.3  
634081806,-2.248720518,6.5918314777\H,-5.3860792475,-3.7098635356,6.41  
07082252\H,-3.5338745563,-2.3210795989,9.8621621461\H,-4.5143388628,-3  
.6257665397,9.1848334071\H,-5.2609986081,-2.0696110183,9.58482647\H,-0  
.286734271,1.5555819189,7.9119173548\H,0.8186043674,-2.5785348695,6.83  
38694947\H,0.1331320591,-1.7782521998,5.4120444661\H,1.8980225661,-1.9  
539241724,5.5842958026\H,2.4618045515,-0.9756542124,8.9529485911\H,3.4  
493969517,-0.5948713117,7.5378415652\H,2.8788517615,0.70756331,8.58981  
99385\H,0.7150547316,1.475214441,5.0974528622\H,1.6958407114,2.2108161  
374,6.3629180196\H,2.4403116582,1.0780462362,5.2312420121\H,0.55545983  
44,2.0537737818,10.5158260772\H,0.4898634206,0.79786073,11.7578246898\  
H,1.6776900361,0.688344631,10.4515766551\H,-2.5770526924,1.5429906227,  
10.2496274601\H,-3.1114763179,-0.1435690533,10.3097352915\H,-2.1147304  
489,0.5114869914,11.6070658436\H,0.5578492237,-2.1776544634,9.57238179  
31\H,-0.3830821793,-2.0307518449,11.0638410902\H,-1.1898016931,-2.4309  
154498,9.5432936666\H,-2.0382187788,4.4318813512,4.9860761854\H,-0.953  
9663384,3.1189413992,8.5635370494\H,-2.7126717615,3.095285033,8.384699  
9161\H,-1.9216960909,4.4183280724,9.2624625416\H,0.4590771113,4.372539  
0137,6.9720317323\H,-0.0983003788,5.8083209458,7.8600993569\H,-0.19738  
74098,5.7673033836,6.0888075969\H,-3.7656025811,5.3249621065,7.2270252  
096\H,-2.6883889069,6.3022707033,6.2075638791\H,-2.543459773,6.3744008  
615,7.9750011875\H,-3.9735197073,1.640689418,4.1343604755\H,-2.3093350  
905,2.1526365954,1.7602888565\H,0.819790636,2.5216547266,2.9254125023\  
H,0.405740941,3.5968928185,4.2672509087\H,1.3844462945,4.195554333,2.9  
197647158\H,-0.3271661014,2.9729431579,0.1332875368\H,0.2383262506,4.6  
480789556,0.1522710967\H,-1.4544481248,4.2963782685,-0.2228506195\H,-1  
.4842519383,6.0340589052,3.7890490089\H,-2.235239729,6.3026129918,2.21  
07347468\H,-0.4936822413,6.5138863198,2.4108557364\H,-5.574073865,1.57  
60228312,2.5825010946\H,-4.9922207866,1.610394887,0.9157569264\H,-6.35  
08977494,2.6334108582,1.4047859085\H,-4.807806503,4.0395889144,4.50700  
96899\H,-5.8428792327,4.9856134506,3.4319576914\H,-4.1913075852,5.5248  
777243,3.7731608539\H,-3.8662738329,4.1331862606,-0.3145736357\H,-3.48  
3688401,5.5821915717,0.629326079\H,-5.1676935324,5.1150920076,0.365540  
385\H,-4.7536551252,-0.8462004139,3.7147318933\H,-2.4639549381,-1.8046  
56321,0.2076092295\H,-4.4206518076,-2.9958046167,-0.7423993419\H,-6.54  
52704024,-3.1191931906,0.5366489277\H,-6.7099511547,-2.0487402203,2.77  
63395427\H,1.333788161,-0.182383219,3.6870133944\H,3.5070266117,-0.148  
1220214,2.4985398967\H,3.5662641702,-0.0672963491,0.0135808878\H,1.438  
4268916,-0.0388245807,-1.2716435528\H,-0.7330534686,-0.0806328622,-0.0  
773673874\Version=EM64L-G09RevD.01\State=1-A\HF=-4045.1021854\RMSD=1.  
063e-09\RMSF=3.432e-06\Dipole=-0.2914164,1.8574697,-3.175609\Quadrupol  
e=-1.4338005,-1.1089392,2.5427397,2.4519242,-0.1966631,5.7464031\PG=C0  
1 [X(C42H78Al1O1P1Si6)]\@

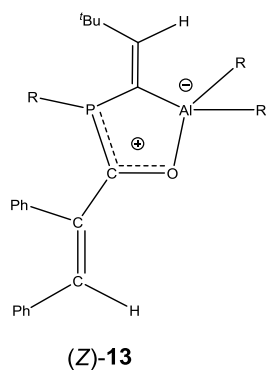

HF=-4045.1417737 au (0)

```

1\1\GINC-LUPUS09\FOpt\RTPSSSTPSS\def2TZVP\C42H78Al1O1P1Si6\WURTHWE\17-F
eb-2018\0\#\# tpsstpss/def2tzvp Opt=(readfc,maxstep=10) emp=gd3bj pop=nbo freq geom=
check guess=read int=(grid=ultrafine,acc2e=11)\(Z)-FLP-propenone-adduct \0,1\C,
0.0141230063,0.0791858358,0.0684465613\C,0.0134954363,0.0633551467,1.4
793641397\C,1.257742149,0.0570652549,2.1432177127\C,2.4434962052,0.067
7875645,1.4176105357\C,2.4243458934,0.0823837639,0.0204731177\C,1.2020
870512,0.0867040447,-0.6533249906\C,-1.2877832691,0.0436033595,2.13227
3547\C,-1.6277159047,-0.1907252233,3.4287172143\C,-3.0559751341,-0.277
9230508,3.7619192833\P,-4.2962934751,0.79041818,2.9787831209\C,-3.5734
739522,2.4936545489,3.3247491194\Si,-4.0138811341,3.3586560206,4.98048
18714\C,-4.8883581141,5.013824922,4.7441726166\C,-0.6833133291,-0.4949
368363,4.5410008242\C,-0.3817581332,-1.8176333307,4.8836594952\C,0.470
0014392,-2.087417112,5.9538371991\C,1.0245243079,-1.0424037723,6.69299
06857\C,0.7262628563,0.2782497456,6.3564143756\C,-0.1258171542,0.54987
73726,5.2875952982\O,-3.4121566282,-1.2289929933,4.5384983039\Al,-5.24
38671673,-1.5879394201,4.7999086469\C,-5.8129170419,-1.4366690918,6.70
81912367\Si,-4.5781352534,-1.1885145769,8.1087412518\C,-2.8729379422,-
0.5686724551,7.572464171\C,-5.4833410839,-3.3241261703,3.8339375389\Si
,-6.1116141755,-3.2620450729,2.0683540431\C,-5.1142918844,-2.107667312
2,0.9538004033\C,-5.7444036052,0.1337032374,3.8131105515\C,-7.04188302
26,0.4917485795,3.7464078388\C,-7.7876231642,1.6159193446,3.0549890834
\C,-8.8032448621,0.9771671519,2.0804422974\Si,-4.0037808908,-4.4538426
07,4.0890928133\C,-4.4937391894,-6.281119252,4.0329834306\C,-3.2076699
022,-4.2322690077,5.789183588\C,-2.6759728986,-4.1557314501,2.77336825
39\C,-8.5703258046,2.418619025,4.1177259262\C,-6.8635364996,2.54621020
12,2.2801591431\Si,-3.3018004453,3.6277809736,1.8073178779\C,-1.854892
9838,4.7444898152,2.2852165547\C,-2.7929685313,2.616089374,0.302719262
2\C,-4.7228582149,4.7298284276,1.2440383095\C,-5.0758353685,2.31597108
86,6.1183003663\C,-2.380907764,3.6823216387,5.8689933703\Si,-7.2552346
03,-2.5564016273,7.1355786652\C,-6.8082612984,-4.3910385496,7.20625255
73\C,-8.0529725843,-2.1270365667,8.7995700507\C,-8.6302337258,-2.33734
34027,5.8518655586\C,-4.2543619977,-2.7423985851,9.1370976039\C,-5.254
7255559,0.1215994036,9.2980850866\C,-6.1071854872,-4.9515582118,1.2069
733215\C,-7.9167278096,-2.7073359595,2.0429160876\H,-6.3055641774,-3.8
113422228,4.3880182341\H,-6.6856793403,-5.6937322423,1.7695195804\H,-5
.0988990752,-5.3549418684,1.0617647158\H,-6.5680983184,-4.8557860712,0
.2149172503\H,-8.5569832634,-3.431658771,2.5614212439\H,-8.2840663064,
-2.6216358754,1.0122487421\H,-8.0506666125,-1.7356687806,2.5262244124\

```

H,-4.0422113645,-2.3317757564,0.9829375434\H,-5.2411674316,-1.05655428  
86,1.232920822\H,-5.4478346764,-2.2206286453,-0.0858907584\H,-2.863030  
2348,-3.2115291739,5.9764161692\H,-2.3415574863,-4.8996886733,5.889855  
6408\H,-3.9185843278,-4.5002867414,6.5775363167\H,-2.3948804675,-3.098  
989399,2.7098734241\H,-3.0123162913,-4.4663248124,1.7777768694\H,-1.77  
10278524,-4.7317228987,3.0056827389\H,-5.2669669399,-6.49749922,4.7808  
999855\H,-3.6274187396,-6.9136360942,4.2670202184\H,-4.8800061394,-6.5  
896816999,3.0573588589\H,-6.2919884263,-0.4384284585,6.6489552481\H,-5  
.1647483407,-3.1343076043,9.6034212637\H,-3.8026352294,-3.5460120235,8  
.5474268232\H,-3.5540231742,-2.4929125571,9.9448674395\H,-6.1925466928  
,-0.1966082261,9.7653033196\H,-4.5337064104,0.3259398841,10.1001044236  
\H,-5.4490459661,1.0664289514,8.7775498472\H,-2.3285813565,-1.29701668  
99,6.9649501224\H,-2.9198308635,0.362089484,6.9979711764\H,-2.26929232  
96,-0.3673285402,8.4671563847\H,-8.3637230668,-1.0757601643,8.83296579  
78\H,-8.9477870513,-2.7427630651,8.9588776661\H,-7.3793722809,-2.30060  
57969,9.6461273638\H,-9.029352427,-1.3153032537,5.8807817329\H,-8.2887  
509397,-2.5323776273,4.8294849123\H,-9.4654555786,-3.0199159317,6.0538  
939259\H,-6.0632497894,-4.6006762882,7.9805089152\H,-7.7060627772,-4.9  
755044758,7.4451402723\H,-6.4144179167,-4.7670951108,6.2571220298\H,-7  
.741830285,-0.1573597859,4.2852392494\H,-7.8915833852,2.9358540553,4.8  
032687832\H,-9.2139366717,1.7574452647,4.7084760398\H,-9.2051409801,3.  
1699872798,3.6331644424\H,-6.1561773824,3.0450028029,2.9480465742\H,-7  
.4420627513,3.3233822876,1.7693239792\H,-6.2935167571,1.9965090588,1.5  
216211624\H,-9.4730844817,0.2883972043,2.6061708252\H,-8.2886520159,0.  
4169616385,1.2936797927\H,-9.4139206002,1.75788072,1.6114396105\H,-2.1  
272314779,0.1626740079,1.4489891915\H,-2.5247132853,2.203951855,3.5114  
010737\H,-4.684016284,1.3019907382,6.2326861376\H,-6.1064738376,2.2232  
565549,5.7707445452\H,-5.0866778345,2.7857871394,7.1099353191\H,-1.927  
7539714,2.7419122669,6.2027110311\H,-2.5508464157,4.2970519037,6.76154  
6191\H,-1.6547237654,4.2051878945,5.2369783445\H,-5.8648648111,4.90990  
9274,4.2593851604\H,-4.2974521458,5.7325952654,4.1670112899\H,-5.06156  
50364,5.4520600666,5.7355914435\H,-3.4777957158,1.7778033205,0.1265125  
641\H,-1.7795604076,2.2165607084,0.4039561309\H,-2.8081976156,3.254978  
8782,-0.5891245444\H,-5.4721901962,4.1725332806,0.6749834602\H,-4.2968  
172215,5.484841076,0.5698053012\H,-5.2323517428,5.259188817,2.05216510  
76\H,-0.9812961289,4.1561087098,2.5907970515\H,-2.103840811,5.42589575  
95,3.1064068654\H,-1.5553589154,5.3599690764,1.4280259386\H,-0.9382845  
724,0.0776632532,-0.4553448753\H,1.2947951477,0.0465110779,3.224831783  
6\H,3.3924151587,0.0651559351,1.9465013635\H,3.3561063514,0.0903773837  
,-0.5378814707\H,1.175840507,0.0957335509,-1.73912335\H,-0.8188749812,  
-2.6299942457,4.3147628589\H,0.6924754681,-3.1181993753,6.2144894432\H  
,1.6824109142,-1.2559730271,7.5304333394\H,1.1498586813,1.0980716061,6  
.9296032307\H,-0.3552609449,1.5774403689,5.0218139614\\Version=AS64L-G  
09RevD.01\State=1-A\HF=-4045.1417737\RMSE=2.728e-09\RMSF=7.246e-07\Dip  
ole=1.5784586,1.9346277,-1.0120506\Quadrupole=10.9100449,-6.9997387,-3  
.9103062,-3.9911107,-0.3222066,-2.9235781\PG=C01 [X(C42H78Al1O1P1Si6)]  
\\@

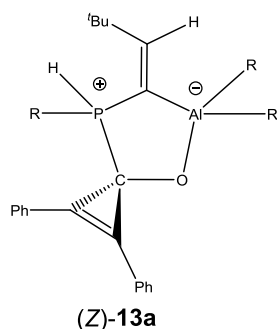

HF = -4045.0898657 au (0)

```

1\1\GINC-LUPUS08\FOpt\RTPSSTPSS\def2TZVP\C42H78Al1O1P1Si6\WURTHWE\07-F
eb-2018\0\#\# tpsstps\def2tzvp Opt=readfc geom=check guess=read Pop=NB
O Freq emp=gd3bj\((Z)-FLP-cyclopropenone-adduct\0,1\C,-0.0
359800088,-0.6393064746,0.1212275013\C,-0.0664069611,-0.4776005757,1.5
202345867\C,1.1489703091,-0.4548565231,2.2278978221\C,2.3607354667,-0.
5845110942,1.5594776473\C,2.3798335963,-0.7527998183,0.1733885433\C,1.
1784437382,-0.7809782315,-0.5412273852\C,-1.2981385179,-0.3775099277,2
.2498574082\C,-1.8711255425,-0.2916907661,3.6348853722\P,-1.7643946145
,-1.8777447588,4.6088530807\C,-2.2152182349,-3.240024161,3.4740226128\
Si,-4.0459212574,-3.6669043809,3.0775074636\C,-4.1906071137,-3.6013581
879,1.2011187362\C,-2.6009258887,-0.1500736969,2.3330796811\C,-3.79788
98298,0.2900154371,1.6635745472\C,-3.961845718,0.0925728787,0.27900217
34\C,-5.1213666278,0.515763962,-0.3609461196\C,-6.1294176456,1.1582204
989,0.3632201126\C,-5.9684831608,1.3736926382,1.7331243729\C,-4.817139
8489,0.9391574892,2.3807214751\O,-1.632677934,0.7821006119,4.458297186
\Al,-1.4221298588,0.6314811952,6.2481094592\C,-2.77837165,1.5283002973
,7.4563908359\Si,-4.2804508341,2.1017345489,6.4906286153\C,-5.61874678
81,3.0243918144,7.4687482078\C,-2.0745171672,-1.3773805793,6.267911975
1\C,-2.5238398018,-1.9121721111,7.4122483219\C,-3.1049415123,-3.248286
3594,7.8216065125\C,-2.0045263877,-4.0114478048,8.5958047408\C,0.46311
17218,1.0580224333,6.764482893\Si,1.7099472117,-0.2687089065,7.1567329
502\C,0.969562786,-1.5620378514,8.3214445211\Si,-0.9787570795,-4.70560
51796,3.4341424275\C,-1.1222241561,-5.8973989894,4.8819991533\C,-1.254
0510391,-5.6317956424,1.815597612\C,0.7855689146,-4.0541820994,3.38808
16581\Si,1.153327185,2.5885070263,5.915960917\C,2.5146663784,2.2304882
279,4.6494658563\C,1.9027508725,3.752151767,7.2093520055\C,-0.15622718
78,3.5750809531,4.9787216137\Si,-2.2972777799,2.6060709454,8.913984046
4\C,-0.7754952532,2.012107474,9.8888215202\C,-2.007485763,4.4042427758
,8.4156651083\C,-3.6583133267,2.5640785013,10.2352072654\C,2.361945465
8,-1.2026056142,5.6465555847\C,3.2315667194,0.4170427793,8.0541920242\
C,-5.1346027409,0.5315090203,5.8707584932\C,-3.8554434903,3.2534316312
,5.0565070755\C,-4.2871847707,-2.9735042912,8.7751419371\C,-3.58759169
26,-4.0836425081,6.6429336622\C,-4.5342512647,-5.4037594141,3.62689068
33\C,-5.2571279879,-2.419801352,3.7810988747\H,0.2546837601,1.43789564
09,7.7795415801\H,2.940641534,0.9601923672,8.961677158\H,3.8130798511,
1.1051816852,7.4302202224\H,3.8995028504,-0.4001565356,8.3561001002\H,
0.585304844,-1.0961938187,9.237191178\H,1.7233963134,-2.302510715,8.61
79963988\H,0.1379624996,-2.0928483782,7.8486778347\H,2.9120072338,-0.5
470537971,4.9643242658\H,1.5586631933,-1.6765439638,5.0725009419\H,3.0

```

464098834,-1.9992486978,5.9646704682\H,-0.5299321597,3.015850438,4.115  
1443045\H,0.2711508881,4.5209120868,4.6209420503\H,-1.0205687485,3.822  
701693,5.6035475885\H,2.1556132437,1.6016650629,3.828397518\H,3.394778  
8924,1.7486352234,5.0898093377\H,2.8470949392,3.1791017941,4.208280664  
4\H,1.1568983403,4.0625201257,7.9505867414\H,2.2895326111,4.6623501432  
,6.733164037\H,2.7302828705,3.2815740421,7.7518219018\H,-3.1858668486,  
0.6313235319,7.9641001432\H,-3.4341062408,4.1928198082,5.4345112308\H,  
-3.1277456698,2.8179684846,4.366058385\H,-4.7604377118,3.5116682071,4.  
4912326736\H,-5.2603711704,3.9689439649,7.8934759831\H,-6.4444579265,3  
.2675571382,6.7860840473\H,-6.0326225434,2.4216811603,8.284815195\H,-4  
.4534923895,-0.0840290605,5.2762164807\H,-5.4422075384,-0.0763366194,6  
.7314871318\H,-6.0305412345,0.7326607645,5.2714006303\H,-3.8698579611,  
1.529354156,10.5364513338\H,-3.3262728693,3.1027306741,11.1322034798\H  
,-4.5995871111,3.0118788283,9.9072224683\H,-0.7373406059,0.9178195301,  
9.9575055544\H,0.1815281366,2.3537745665,9.4825504973\H,-0.8468519056,  
2.4004956997,10.9131641693\H,-2.9002979182,4.8456745276,7.957024283\H,  
-1.7515980398,5.0122016127,9.292407683\H,-1.1871525906,4.4988012409,7.  
6967474418\H,-2.4334964323,-1.2564399101,8.2864813737\H,-2.807613089,-  
4.1942786829,5.8869791507\H,-4.4595949545,-3.6226242149,6.1744279258\H  
,-3.8710634428,-5.0875286834,6.9782922175\H,-1.159991004,-4.2486594896  
,7.9411633292\H,-2.4117870737,-4.9483644586,8.9937182048\H,-1.62455077  
96,-3.4156509464,9.4318190662\H,-5.0783530356,-2.4153469068,8.26314002  
16\H,-3.9615341364,-2.3882532329,9.6422112834\H,-4.70999271,-3.9171481  
065,9.1380700336\H,-0.367539192,-2.0068047668,4.6784681554\H,-1.922389  
8664,-2.7241153432,2.5368457379\H,-5.1552898707,-1.4549828491,3.276777  
2366\H,-5.1490760378,-2.2414718283,4.8533053213\H,-6.2804435591,-2.774  
7899349,3.604420264\H,-3.9788457148,-2.5938003281,0.8282991445\H,-5.21  
34545734,-3.8547108372,0.896222596\H,-3.5117614271,-4.3009826384,0.703  
6986887\H,-4.5223402545,-5.5390091612,4.7109973327\H,-3.9016186793,-6.  
1786560583,3.1819560804\H,-5.5605468378,-5.5881664597,3.2836204922\H,1  
.1378662602,-3.6945755911,4.3599844732\H,0.910932412,-3.2415489989,2.6  
640011765\H,1.4542261426,-4.8705257692,3.086014116\H,-0.863396873,-5.4  
190433116,5.8325329743\H,-0.4082753579,-6.7161294907,4.7247274544\H,-2  
.1181200273,-6.3376823374,4.983997597\H,-1.1093288074,-4.9685974054,0.  
9547100414\H,-2.2457483464,-6.0853675046,1.7293763256\H,-0.5140372186,  
-6.4380577333,1.7368171945\H,1.1258857823,-0.3241365294,3.303142926\H,  
-0.9670087505,-0.6578859611,-0.4365107917\H,1.1917713058,-0.9105731339  
,-1.6197968729\H,3.3255352897,-0.8601249129,-0.3498445158\H,3.28970156  
25,-0.5572068186,2.1213521828\H,-4.6839028328,1.1137067049,3.439994077  
6\H,-6.7431748081,1.8819780424,2.30020295\H,-7.0321275162,1.4920725867  
,-0.1401547162\H,-5.2400231685,0.3484337686,-1.4277794352\H,-3.1809221  
355,-0.4084763916,-0.2847374991\Version=AS64L-G09RevD.01\State=1-A\HF  
=-4045.0898657\RMSD=3.564e-09\RMSF=1.866e-06\Dipole=-0.7188239,-2.8401  
005,-2.0523082\Quadrupole=-0.6149122,-5.2631836,5.8780958,-2.0353205,-  
1.6293782,-3.7833872\PG=C01 [X(C42H78Al1O1P1Si6)]\@

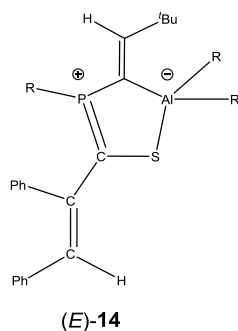

HF=-4368.1122615 au (0)

1\1\GINC-PALMA277\FOpt\RTPSSTPSS\def2TZVP\C42H78Al1P1S1Si6\WURTHWE\25-Jan-2018\0\# tpsstps\def2tzvp Opt=readfc Pop=NBO Freq emp=gd3bj geom =check guess=read\|(E)-FLP-propenthione-adduct\|0,1\Al,-1.3327217224,-0.9126749011,-0.6442968563\C,-0.8131765014,-2.8381121574,-0.8605249676\H,-1.5844462351,-3.2836607959,-1.5107794491\Si,0.827170603,-3.1890492497,-1.6922108789\C,1.3286079411,-5.0171116922,-1.6455157504\H,1.4559478966,-5.4126776555,-0.6331807473\H,2.2809605921,-5.1504977548,-2.1754956452\H,0.580764815,-5.6391526091,-2.152663967\C,0.8115587547,-2.7786107671,-3.5379690111\H,0.0562048862,-3.3597829343,-4.0805907604\H,1.7878828911,-3.0161188311,-3.9797855157\H,0.6154994698,-1.7175584994,-3.7155260584\C,2.2161647471,-2.1696060437,-0.926972415\H,1.9694379835,-1.1031684399,-0.9854032056\H,3.1589640043,-2.3262011691,-1.4654545972\H,2.3817136013,-2.4094761446,0.1273628453\Si,-0.9765393084,-3.7672658931,0.7734661733\C,-2.2499791659,-2.977803471,1.9225616937\H,-3.2198250465,-2.8588135046,1.4325142904\H,-1.9414833343,-1.9890823267,2.2787719593\H,-2.4003811589,-3.6074549517,2.8089771977\C,0.6253127578,-3.839983218,1.7794290285\H,0.4333117735,-4.3886844083,2.7107130131\H,0.9664932939,-2.8351214772,2.0511493869\H,1.4436193052,-4.3483093827,1.2599410024\C,-1.5499548852,-5.5451052301,0.471027278\H,-0.8250971765,-6.1116148326,-0.1226979417\H,-2.5073682448,-5.5738120185,-0.0629033999\H,-1.6873374351,-6.0712588017,1.4244176538\C,-3.2533968743,-0.3186343505,-0.4693740905\H,-3.2863600196,0.3096750526,-1.3822761331\Si,-3.6226518459,1.0071675529,0.8103643996\C,-3.489026226,0.4303829758,2.5993477472\H,-2.4509876714,0.2025161653,2.8640754366\H,-4.0932732994,-0.4600016328,2.7998337593\H,-3.8361913903,1.2269810872,3.2700998608\C,-5.3435853513,1.7755118339,0.5716960161\H,-5.4720273768,2.6024777363,1.2827484931\H,-6.1740418196,1.0798527073,0.7252140319\H,-5.4450487001,2.1947743078,-0.4372193541\C,-2.4670027964,2.4824153254,0.563544791\H,-1.4117880809,2.193597286,0.5799227983\H,-2.6275938643,3.2302932034,1.3510763372\H,-2.662817204,2.9681009935,-0.3992147545\Si,-4.7020789321,-1.4935938192,-0.75911272\C,-5.8531017857,-0.6994734015,-2.0373051792\H,-5.3308663488,-0.5319192115,-2.9875523705\H,-6.2341917626,0.2679070985,-1.6938847072\H,-6.7155281827,-1.3455217518,-2.2447130327\C,-4.2563839668,-3.1935799923,-1.4616000107\H,-5.1862448809,-3.7345128719,-1.6820306949\H,-3.6870692104,-3.8007739957,-0.7513771848\H,-3.680680676,-3.1370917971,-2.3915364845\C,-5.7463964348,-1.8690494052,0.7769550867\H,-6.593020925,-2.4991250356,0.4738777085\H,-6.1575122651,-0.9709306058,1.2472430307\H,-5.1929206984,-2.4179520295,1.5456432029\C,-0.4244224432,0.4524027657,-1.8921943643\C,-0.5907802142,0.7914907526,-3.1974578203\H,0.0137676077,1.

5996995244,-3.6201429358\C,-1.5783504443,0.2718300612,-4.220450941\C,-  
2.271214212,-1.0322101413,-3.8201745824\H,-1.5513519197,-1.8319474885,  
-3.6409934851\H,-2.9500943557,-1.3543173731,-4.6176154637\H,-2.8698663  
867,-0.8979993007,-2.917367168\C,-2.6468117378,1.3818193334,-4.3982811  
265\H,-3.2004256536,1.5380458035,-3.467020127\H,-3.3566613686,1.092711  
0509,-5.1821383159\H,-2.1845792065,2.3322965448,-4.6880609044\C,-0.845  
9065509,0.0809706317,-5.5668991868\H,-0.3456155237,1.0058523328,-5.876  
6900562\H,-1.5645602395,-0.1928707253,-6.3474252643\H,-0.0933558389,-0  
.7100898954,-5.5004365749\H,0.729142853,1.4498842826,-1.0067792799\C,1  
.9234877578,2.5697369928,-1.7867813926\H,2.3257968044,3.1044051298,-0.  
9108704903\Si,1.1592301671,4.0209348611,-2.7914452784\C,-0.605262693,4  
.3171842941,-2.2232952643\H,-0.6383824797,4.5415448377,-1.1516732443\H  
,-1.2408426193,3.4428951558,-2.3977519123\H,-1.0440469894,5.1668240353  
,-2.7608527945\C,2.2047580263,5.5345973421,-2.3993636775\H,1.783316203  
8,6.4198823142,-2.891532818\H,3.2372232485,5.4224594783,-2.7450386641\  
H,2.2284263641,5.7261132755,-1.3215613873\C,1.1979850942,3.765106413,-  
4.660766382\H,0.9003114257,4.7069902281,-5.1396383034\H,0.5095783113,2  
.9917510397,-5.013427206\H,2.1981538466,3.5151074488,-5.0289469688\Si,  
3.4463250718,1.6727761852,-2.5221555037\C,4.3773168012,0.8062165459,-1  
.1385133277\H,5.1868745695,0.1977798261,-1.5607855513\H,3.742083904,0.  
1460270428,-0.5431702582\H,4.8321486323,1.5386140672,-0.4628653441\C,2  
.9135235198,0.4519481972,-3.8405905175\H,2.4018205447,0.9433868149,-4.  
6748382363\H,2.2349386626,-0.2996716957,-3.4282664874\H,3.7865756524,-  
0.074355498,-4.2452250023\C,4.6257931432,2.9550303804,-3.2464126956\H,  
5.5248274173,2.4428386237,-3.6123768771\H,4.9458054844,3.6731695203,-2  
.4825951469\H,4.2045450705,3.5177090995,-4.0851393023\C,0.9866686056,0  
.9347266887,0.5984614288\Si,-0.0580098986,-0.272244357,1.2540481711\C,2  
.0002764516,1.5228947766,1.4963991488\C,2.21451804,2.9910138054,1.4505  
072324\C,1.1115962308,3.8590125166,1.4668728315\H,0.1100285246,3.44343  
07072,1.5133081275\C,1.2952604304,5.2404686657,1.4405503367\H,0.430650  
2555,5.8978135824,1.4657747329\C,2.5824510891,5.7767616179,1.380933405  
8\H,2.7254848662,6.8531742509,1.3544729671\C,3.6860698432,4.9210732385  
,1.3442406094\H,4.6906241468,5.3302938824,1.2841562663\C,3.5045250724,  
3.5414743668,1.381233311\H,4.3625610161,2.877805284,1.3623800261\C,2.6  
757752688,0.6775841555,2.3217280621\H,2.4739141012,-0.3827677809,2.177  
4683261\C,3.6478393075,0.9748638467,3.3697236352\C,3.6117270835,2.1366  
800952,4.1648292447\H,2.8297074628,2.8707367723,4.0054414617\C,4.55272  
7476,2.3368867601,5.1686027089\H,4.5020761593,3.2344206226,5.778913004  
6\C,5.5520296943,1.3883331957,5.4038457844\H,6.2859064321,1.5517794797  
,6.1878282938\C,5.5879751616,0.221445388,4.6392949533\H,6.3501817603,-  
0.5299557667,4.8254039014\C,4.6385215451,0.0126023418,3.64361393\H,4.6  
599745709,-0.901769516,3.0556543901\\Version=EM64L-G09RevD.01\State=1-  
A\HF=-4368.1122615\RMSD=8.126e-10\RMSF=2.267e-06\Dipole=2.0229187,2.24  
85997,-0.8548078\Quadrupole=-2.2404939,0.0986428,2.1418511,3.3766784,7  
.9386467,0.6784503\PG=C01 [X(C42H78Al1P1S1Si6)]\@



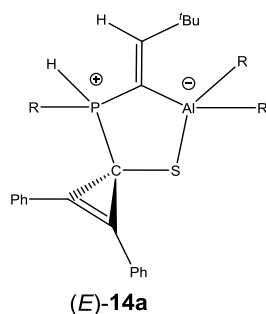

HF=-4368.0715408 au (0)

1\1\GINC-PALMA288\FOpt\RTPSSTPSS\def2TZVP\C42H78Al1P1S1Si6\WURTHWE\30-  
 Jan-2018\0\#\# tpsstpps/def2tzvp Opt=readfc Pop=NBO Freq emp=gd3bj geom  
 =check guess=read\|(E)-FLP-cyclopropenthione-adduct\|0,1\C,0.5156237708,0.091574  
 8727,0.4724295338\C,0.1778411655,-0.2322086801,1.7989205323\C,1.164713  
 916,-0.7553906738,2.6514726096\C,2.4613216266,-0.9413708673,2.18407845  
 87\C,2.7957983761,-0.599440398,0.87185403\C,1.8187262806,-0.0827746334  
 ,0.0177638813\C,-1.1757802156,-0.0705536038,2.2664280754\C,-2.46044502  
 46,-0.2976777296,2.0805513516\C,-3.5535817894,-0.7947399567,1.29549250  
 2\C,-4.7809575907,-1.1006977311,1.9096164434\C,-5.8497347316,-1.562587  
 8856,1.1496389583\C,-5.7145804315,-1.7173641688,-0.2315339909\C,-4.497  
 4563726,-1.4170547049,-0.8509221849\C,-3.4211803683,-0.9634886402,-0.0  
 969126299\C,-2.0602292271,0.1380373902,3.4632850134\S,-2.1152391768,-0  
 .9886470734,4.8900746325\Al,-2.1595986853,0.4492514198,6.7708765278\C,  
 -2.2340021389,2.1936346058,5.6396968712\P,-2.7198442006,1.7489524704,3  
 .9903646856\C,-2.6959538647,2.9212213312,2.6097494928\Si,-4.395594172,  
 3.7713559243,2.3629802637\C,-4.3731311352,4.8020792269,0.7855996806\C,  
 -3.8489323338,-0.0628496756,7.7280544947\Si,-3.9101362988,-1.9300449,8  
 .0039816565\C,-4.5841430397,-2.3463184703,9.7250841741\C,-0.4504450202  
 ,0.513186336,7.8600484692\Si,-0.3657581342,0.3036240997,9.7295607621\C  
 ,0.3487738708,-1.3564524534,10.2981708752\Si,-5.4912813875,0.605500861  
 6,7.1437593317\C,-5.9221712643,-0.0018685212,5.3982978091\C,-6.9227823  
 934,0.1131532495,8.2833069851\C,-5.5399141809,2.4982892585,7.106745304  
 \C,-2.211232278,-2.7473566984,7.8688176909\C,-4.9910510609,-2.84837284  
 03,6.7534047123\Si,1.0830774478,-0.0941522602,6.9625640884\C,1.2384877  
 005,1.0037223403,5.4374827334\C,1.0758509865,-1.9224564053,6.504650373  
 8\C,2.7083003151,0.211952374,7.8965896904\C,0.733040003,1.6806800411,1  
 0.4309096278\C,-1.9979699811,0.4910062314,10.6680922396\C,-2.051703180  
 2,3.5161731118,5.8464736959\C,-1.7687235858,4.2676536281,7.1339963343\  
 C,-2.4838163124,5.6331971627,7.0472848313\C,-2.2656354105,3.5376735592  
 ,8.3872896741\C,-0.2433519872,4.5116960901,7.2175925476\Si,-1.15265994  
 29,4.0169634421,2.2835886304\C,-1.3945452629,5.8120124,2.8104313714\C,  
 0.3874225589,3.3611092283,3.1174745969\C,-0.8859689467,3.9522508176,0.  
 4196748236\C,-5.7133699494,2.4534699024,2.1058729478\C,-4.8209499993,4  
 .8403751443,3.8456346066\H,-3.7201747251,0.3708590019,8.7342141836\H,-  
 6.7334318395,0.4293956366,9.3164911645\H,-7.0946247957,-0.9689406527,8  
 .2939157931\H,-7.8545117205,0.5924245328,7.9546949816\H,-5.4771980199,  
 2.91783871,8.118007597\H,-6.4846086546,2.8438366358,6.6673519763\H,-4.  
 7144998505,2.915158035,6.521386012\H,-6.6386468353,-0.8294400517,5.421  
 8190542\H,-5.0193287573,-0.3682238866,4.8982344158\H,-6.3658802867,0.7  
 989301947,4.7948366751\H,-1.902186989,-2.8672885977,6.8245780465\H,-2.

2426869961,-3.7506390538,8.3137339992\H,-1.4262369954,-2.1840578033,8.379583822\H,-4.6707549522,-2.6438139692,5.726672799\H,-6.0560205045,-2.6075613671,6.8384030948\H,-4.8836216267,-3.9270871312,6.9275346346\H,-3.8998002297,-2.0383974358,10.5238302792\H,-4.7256567466,-3.4310995761,9.8182524828\H,-5.5494975225,-1.8653257932,9.9147184346\H,-0.2604212789,1.6001665008,7.7648521957\H,1.0206428574,-2.5572495893,7.3962001188\H,0.2287859166,-2.1764533152,5.8602752148\H,2.0033411272,-2.1786059666,5.9753273826\H,2.7777253796,-0.3094369716,8.8566669794\H,3.5441232686,-0.1353101878,7.274047893\H,2.8647148945,1.2810208103,8.0840821162\H,0.3324180202,0.9703058358,4.8250776318\H,1.3687074945,2.0410365706,5.7691083159\H,2.09304753,0.7557182412,4.799123001\H,0.3309579509,2.6667327674,10.1649194164\H,0.7690576104,1.6251775376,11.5265352099\H,1.761005561,1.6314604824,10.059385091\H,-2.5092029319,1.4333430241,10.4419182443\H,-2.6955423658,-0.3261549837,10.4682938228\H,-1.7823961966,0.484511157,11.7448638543\H,1.2681431675,-1.6344855953,9.7728570214\H,0.5881778689,-1.2916830603,11.3677253774\H,-0.3632500296,-2.1794339616,10.1760465579\H,-2.1038276202,4.2021503706,4.9933824371\H,-1.8436236404,2.5353947091,8.4738642405\H,-3.3535077525,3.4460678881,8.3742181949\H,-1.9766493094,4.0978283708,9.2836248939\H,0.3004662467,3.5670690109,7.3031894236\H,-0.0119107077,5.1268644573,8.0946782828\H,0.1197328771,5.0362144948,6.3263231607\H,-3.5673714767,5.5012981754,6.9595860491\H,-2.1351657265,6.2081361459,6.1813256964\H,-2.281325572,6.2213213909,7.9489454228\H,-4.0678664095,1.3934747186,4.1465206362\H,-2.6466426688,2.2114008761,1.7619893942\H,0.5945717964,2.3217520681,2.8463136077\H,0.3227782688,3.412699355,4.2069097654\H,1.2499695474,3.9620761131,2.8022829977\H,-0.684416459,2.9235857441,0.0988572321\H,-0.0148738298,4.5580336123,0.1419883104\H,-1.744632736,4.3229449737,-0.1482698932\H,-1.5043622433,5.9228861934,3.893785008\H,-2.2553431972,6.2913876198,2.3349734913\H,-0.5009346026,6.3776398507,2.5164388893\H,-5.8630445519,1.8067947937,2.9753045778\H,-5.4688258468,1.8088198931,1.2542825795\H,-6.6737999007,2.9386647843,1.8905002204\H,-4.8855762883,4.2503474971,4.7657854059\H,-5.7961019402,5.3190130306,3.6935928282\H,-4.082524652,5.6319712792,4.0060984376\H,-4.1542899139,4.1782916556,-0.0886716487\H,-3.6560675864,5.6276297395,0.8012520048\H,-5.370552843,5.2346902669,0.6364792022\H,-4.879222962,-0.9850386289,2.9832130217\H,-2.4735119339,-0.7330849339,-0.5746132217\H,-4.3897220231,-1.5397501643,-1.9249196709\H,-6.552367624,-2.0722867022,-0.8247074639\H,-6.791263822,-1.7994634979,1.6364401998\H,0.8929937376,-1.0357361303,3.6621439128\H,3.2144533938,-1.3571210812,2.8474217143\H,3.8116973296,-0.7396995895,0.514151689\H,2.0731068111,0.1818132247,-1.0046980657\H,-0.2465894765,0.4941607231,-0.1885640402\\Version=EM64L-G09RevD.01\State=1-A\HF=-4368.0715408\RMSD=1.326e-09\RMSF=2.101e-06\Dipole=-0.199979,2.0289572,-3.0831694\Quadrupole=-0.5972699,-4.0754606,4.6727305,-0.7283991,0.7526131,3.3719544\PG=C01 [X(C42H78A11P1S1Si6)]\@

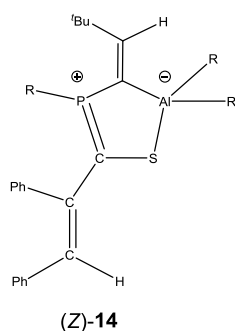

HF=-4368.0984059 au (0)

```

1\1\GINC-PALMA321\FOpt\RTPSSTPSS\def2TZVP\C42H78Al1P1S1Si6\WURTHWE\23-
Feb-2018\0\#\# tpsstps\def2tzvp Opt=(readfc,maxstep=10) geom=check gue
ss=read int=(grid=ultrafine,acc2e=11) emp=gd3bj pop=nbo freq\|(Z)-FLP-propenthione
-adduct\|0,1\C,-0.0088973616,0.0230922266,-0.0244664028\C,-0.0112800744,
-0.0009671826,1.3849857268\C,1.2284621997,-0.0156976412,2.0531892275\C
,2.4256702576,0.026683885,1.3450457647\C,2.410032973,0.062318276,-0.04
99953144\C,1.1877584638,0.051907167,-0.7294116427\C,-1.231559809,-0.11
80595294,2.1722326545\C,-2.5033024978,0.284553557,1.8640061344\C,-3.61
49471392,-0.1963655398,2.6887902691\P,-3.5094999013,-1.817995587,3.390
4267447\C,-2.8720448303,-2.9163685799,2.0317353775\Si,-4.1226728191,-3
.406541642,0.6599533046\C,-4.1818585194,-5.2519350857,0.2732168661\C,-
2.8178526192,1.2454966799,0.7774697072\C,-2.0274065402,2.3904848093,0.
5962351479\C,-2.3271472343,3.3057076768,-0.4082590061\C,-3.4236530324,
3.0947429916,-1.247066359\C,-4.2275189333,1.96900928,-1.0639622618\C,-
3.9311554405,1.0577431247,-0.0544153014\S,-4.8514957195,0.9063022859,3
.0611723539\Al,-6.2046881495,-0.3911326746,4.4892710305\C,-8.049008744
,-0.8653519151,3.8594588824\Si,-8.8289711537,-0.144503425,2.3017594956
\C,-7.6443033158,0.7305443083,1.1136161905\C,-6.0373382878,0.581455824
3,6.2348989283\Si,-4.6193946731,0.0939089996,7.3562541742\C,-2.9551842
7,0.1192190932,6.4647792723\C,-5.0525080717,-2.0676622117,4.2280321421
\C,-5.5012725893,-3.1571241161,4.8909348657\C,-4.8870781697,-4.5229346
562,5.1650800459\C,-5.7003240841,-5.2142553963,6.2750244625\Si,-6.2368
459848,2.4406200616,6.0236492809\C,-7.080411284,3.2076475277,7.5341615
81\C,-7.34559463,2.8754731727,4.5528990401\C,-4.5926975771,3.334788966
6,5.7572736904\C,-4.9666554005,-5.3703219389,3.8821974145\C,-3.4302497
582,-4.3769659504,5.6290454536\Si,-1.3739429479,-4.054573472,2.3740455
408\C,-0.417745193,-4.072422022,0.7465239835\C,-0.2648609098,-3.290312
9936,3.6941891424\C,-1.7219767693,-5.8470996278,2.8314314009\C,-5.8508
397192,-2.8064047408,1.0724068521\C,-3.4988246083,-2.5582258075,-0.906
10983\Si,-9.2856215281,-1.1207201322,5.2518443925\C,-9.8276323008,0.47
96498464,6.09436451\C,-10.8566296207,-2.0070792525,4.6688674915\C,-8.5
941040956,-2.2434135402,6.6139925947\C,-10.2097984036,1.109760253,2.61
91073506\C,-9.5836907759,-1.5653110522,1.3019136826\C,-4.4416634382,1.
2056688922,8.8821642275\C,-4.9098576229,-1.6360264577,8.0617053835\H,-
6.9446552657,0.2703106344,6.7835044186\H,-5.3611985098,1.2109310274,9.
4795991596\H,-4.1997669002,2.2447674341,8.6347222672\H,-3.6352543472,0
.8235853377,9.5221295096\H,-5.7989658911,-1.6531416356,8.7040467196\H,
-4.0563349759,-1.9601174836,8.6708617961\H,-5.0585195276,-2.3731011353
,7.2673322895\H,-2.7694440571,1.0840585237,5.9810764607\H,-2.896401183

```

3,-0.6560335733,5.6915787635\H,-2.1398298829,-0.0623459523,7.176735718  
2\H,-6.9243557707,2.577370383,3.5862345969\H,-7.5043298482,3.960771382  
6,4.5113997065\H,-8.3263277358,2.4005045638,4.6494390274\H,-4.07239604  
76,2.9656656444,4.8667633651\H,-3.9154896281,3.2329030097,6.611966186\  
H,-4.7810105189,4.4061955145,5.6108989924\H,-8.0637937752,2.756633619,  
7.7140900993\H,-7.2367529712,4.2828685472,7.3779260504\H,-6.4873187245  
,3.0850828329,8.4457928436\H,-7.8231150825,-1.8985287886,3.5262268074\  
H,-11.0329666823,0.7017578137,3.2145769768\H,-9.8446229854,2.012301855  
2,3.1198850765\H,-10.6271907933,1.4192764251,1.651932562\H,-10.3700984  
908,-2.0854605059,1.8587797818\H,-10.0239722572,-1.1958799092,0.366884  
5948\H,-8.8191950217,-2.3061664761,1.0389817205\H,-6.817115832,0.08682  
8562,0.7996971726\H,-8.2021033417,1.0155374425,0.21118682\H,-7.2094429  
268,1.643226018,1.5332407282\H,-10.6168096363,-2.9703577685,4.20202659  
92\H,-11.5121768253,-2.2093942979,5.5259195929\H,-11.4333546486,-1.422  
8426637,3.9439905771\H,-8.4726672774,-3.2748107037,6.2608233441\H,-7.6  
289922202,-1.9082232974,7.0082293851\H,-9.2986099496,-2.2727704229,7.4  
554806422\H,-10.3001382475,1.1819224558,5.4012131992\H,-10.5599765906,  
0.2437988361,6.8771785501\H,-8.9914130776,0.9972123492,6.5737215927\H,  
-6.4958188347,-3.0575156678,5.3334081535\H,-4.3732615333,-4.9116797298  
,3.0885214895\H,-6.0020464227,-5.4522253147,3.5348045326\H,-4.58073950  
14,-6.3808486604,4.0599012946\H,-2.8195710947,-3.86914375,4.8755255301  
\H,-2.985326024,-5.3604903172,5.8170575505\H,-3.3762741317,-3.78942728  
61,6.5499448052\H,-6.7448333889,-5.3415035668,5.9686605137\H,-5.686145  
1842,-4.6252419263,7.1979356691\H,-5.2850598312,-6.2045064875,6.492457  
026\H,-1.1098783165,-0.6110722584,3.1358844344\H,-2.3079245252,-2.1369  
132514,1.4900127361\H,-5.8527851731,-1.7552809333,1.3799054617\H,-6.29  
64521512,-3.3794814894,1.890412321\H,-6.4995282003,-2.901844672,0.1933  
938805\H,-3.3925871175,-1.4763261491,-0.7781732057\H,-4.1895711954,-2.  
7286946631,-1.7410579481\H,-2.5194841624,-2.9539955578,-1.1991898397\H  
,-4.565800822,-5.8604581149,1.0965574456\H,-3.2001537452,-5.644307183,  
-0.0137089981\H,-4.8523430792,-5.3966899727,-0.5841104445\H,-0.8236660  
712,-2.9356366161,4.5672315805\H,0.297632772,-2.4437944863,3.286568401  
5\H,0.4644468543,-4.0318244594,4.042821583\H,-2.1151210369,-5.96583697  
39,3.8429617618\H,-0.7673319729,-6.3876566754,2.7827446116\H,-2.412440  
4635,-6.335616138,2.1385033166\H,-0.1610630221,-3.0577906123,0.4207994  
036\H,-0.9803035615,-4.5547556811,-0.0609827104\H,0.5198571685,-4.6287  
505066,0.8684580736\H,-0.9517661219,0.0023361188,-0.5601174649\H,1.240  
1761056,-0.0512093656,3.1398747834\H,3.3709285648,0.0247308666,1.88025  
33354\H,3.34269027,0.0872906665,-0.606119344\H,1.1705204105,0.05956748  
08,-1.8156002665\H,-1.1830968302,2.5616673693,1.2566317995\H,-1.711147  
1387,4.1922781312,-0.529345082\H,-3.6584561874,3.8117635545,-2.0285486  
137\H,-5.0935225832,1.8047839888,-1.6985431185\H,-4.5738462502,0.19805  
06443,0.1006481556\|Version=EM64L-G09RevD.01|State=1-A|HF=-4368.098405  
9|RMSD=5.409e-09|RMSF=8.343e-07|Dipole=2.1686501,-1.1723349,-1.6087138  
\Quadrupole=2.424444,-0.5236841,-1.9007599,2.3654626,-3.8680617,-8.128  
2965|PG=C01 [X(C42H78Al1P1S1Si6)]\|@

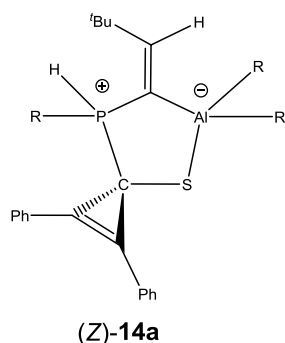

HF=-4368.054055 au (0)

1\1\GINC-PALMA320\FOpt\RTPSSTPSS\def2TZVP\C42H78Al1P1S1Si6\WURTHWE\03-  
 Feb-2018\0\#\# tpsstps\def2tzvp Opt=readfc geom=check guess=read Pop=N  
 BO Freq emp=gd3bj\((Z)-FLP-cyclopropenthione- adduct \0,1\C,  
 -0.4848632579,-1.7585890597,-0.1333711224\C,-0.3052736568,-1.078559443  
 ,1.0867776927\C,1.001092075,-0.8247683992,1.5458043052\C,2.0980026183,  
 -1.2415280381,0.8006387678\C,1.9123758213,-1.9266973761,-0.4029654512\  
 C,0.6189491949,-2.1828101183,-0.8658384845\C,-1.4281531304,-0.69889590  
 52,1.8940835758\C,-1.8079441345,-0.3179563307,3.301919447\P,-1.6671365  
 301,-1.7185694109,4.5020656507\C,-2.0623856358,-3.2290793391,3.5561162  
 073\Si,-3.8736742914,-3.6726977124,3.097505377\C,-3.9193949043,-3.7068  
 864731,1.2136970072\C,-2.6702972641,-0.2941086058,2.0772355568\C,-3.86  
 35307279,0.2703178332,1.5058324212\C,-4.2669348275,-0.0613224615,0.198  
 7478645\C,-5.4111962996,0.5091927822,-0.3471528748\C,-6.1586217736,1.4  
 298635929,0.3924367442\C,-5.7495362477,1.7831856436,1.6801510004\C,-4.  
 6134206392,1.2072475888,2.2372469402\S,-1.1869366326,1.2289845971,4.01  
 67199251\Al,-1.3252240628,0.8245150491,6.2978055271\C,-2.7965084355,1.  
 6414969502,7.4320461753\Si,-4.2533632367,2.2642512512,6.4251855471\C,-  
 5.6836618203,3.0051807713,7.4266476794\C,-2.0057610999,-1.1513683204,6  
 .1340632951\C,-2.4442217499,-1.6787055824,7.2908003067\C,-3.0293981949  
 ,-2.9946367439,7.7533620403\C,-1.9620098636,-3.699945533,8.6219326395\  
 C,0.5275888615,1.1280031048,6.9749500773\Si,1.8104352358,-0.2175661649  
 ,6.8712797394\C,1.1755546524,-1.8189651877,7.6578581726\Si,-0.79808671  
 59,-4.6669166611,3.7057468699\C,-1.0739205912,-5.8989593491,5.10075931  
 11\C,-0.8757822892,-5.5791399366,2.0577563215\C,0.9390612142,-3.973154  
 7507,3.8968347094\Si,1.1245312347,2.8329503391,6.442655072\C,2.3824453  
 325,2.7957074871,5.0321743526\C,1.921417236,3.7194910622,7.9132404977\  
 C,-0.2773942884,3.9423813412,5.8169680237\Si,-2.4812357614,2.487378982  
 6,9.0777076188\C,-1.0078990133,1.7863410161,10.0492100802\C,-2.2568738  
 472,4.359778716,8.9607329634\C,-3.9401732406,2.1512412045,10.244849062  
 8\C,2.3286306677,-0.6455436886,5.1049231469\C,3.3867709165,0.236460647  
 7,7.8189771658\C,-4.9891113595,0.7265696148,5.6033639028\C,-3.82921542  
 01,3.587558834,5.1493388909\C,-4.2498477491,-2.6631362697,8.6420865479  
 \C,-3.4682148521,-3.9073153313,6.6177367436\C,-4.3905377042,-5.3871553  
 002,3.6851890104\C,-5.1108127875,-2.3839290815,3.6770703595\H,0.375351  
 9459,1.229244728,8.0616336695\H,3.1644001581,0.4657875384,8.8685541682  
 \H,3.8887083556,1.1113893436,7.3895654122\H,4.1036780136,-0.5948214519  
 ,7.8053505951\H,0.8099720244,-1.6457948588,8.6774601034\H,1.9716273219  
 ,-2.5727127908,7.7116720194\H,0.3430267554,-2.2414438675,7.0861896584\  
 H,2.9454798723,0.1387808473,4.6569562496\H,1.4539482016,-0.7740078344,

4.4602642289\H,2.9035045889,-1.579442907,5.0836947306\H,-0.5274614695,  
3.7247209203,4.7723117012\H,0.0308799253,4.9950578231,5.8657511858\H,-  
1.1971029118,3.8437890832,6.4010960123\H,1.9686853224,2.2828981618,4.1  
564402709\H,3.3228411182,2.3054863416,5.307020736\H,2.6207459233,3.824  
8418007,4.7335596449\H,1.1952934018,3.8982965011,8.7152717831\H,2.3223  
480659,4.6954080654,7.6107145829\H,2.745446698,3.1355541571,8.33851264  
12\H,-3.2400984819,0.6915848176,7.7914739159\H,-3.4620874295,4.4966632  
021,5.6404321563\H,-3.0640976489,3.2605075778,4.4388057726\H,-4.730283  
7935,3.865079964,4.5863072206\H,-5.3868315361,3.8888209553,8.002785410  
8\H,-6.4743400152,3.3190219495,6.731683948\H,-6.1236335966,2.281278828  
6,8.121435182\H,-4.2451962116,0.1983637973,4.9988893125\H,-5.312966026  
2,0.0304892114,6.3882035502\H,-5.8571553587,0.9385310723,4.9685969723\  
H,-4.1446977324,1.0741099029,10.3101863634\H,-3.6989404578,2.499362055  
1,11.2575990307\H,-4.8659228834,2.6436653891,9.9364690873\H,-0.9589516  
646,0.691859132,9.9803675667\H,-0.0401940945,2.1840153289,9.7302719554  
\H,-1.1305325584,2.0415616095,11.1097782133\H,-3.0747014411,4.83363789  
48,8.4048701827\H,-2.2458098578,4.7968818446,9.9673514931\H,-1.3189305  
2,4.6386744975,8.4705010502\H,-2.3546750336,-1.0064827818,8.1529758621  
\H,-2.6501018723,-4.1006244842,5.9236888393\H,-4.2954416712,-3.4611238  
301,6.0624108501\H,-3.8047641391,-4.8720385377,7.0130511557\H,-1.08577  
47014,-3.9707430804,8.0259504247\H,-2.384634315,-4.6114948202,9.060167  
694\H,-1.625841459,-3.0496146505,9.436013651\H,-5.0245882759,-2.147089  
7458,8.0650430501\H,-3.9611534087,-2.0190444008,9.4798615862\H,-4.6789  
445768,-3.5850586813,9.0504222358\H,-0.2674873795,-1.7681974318,4.5612  
670855\H,-1.7207630729,-2.8491686745,2.5716979449\H,-4.9783131999,-1.4  
431072414,3.135653386\H,-5.0577434133,-2.1544979742,4.7439588717\H,-6.  
1258392571,-2.7426620242,3.4640515854\H,-3.6576330906,-2.7268997869,0.  
803610935\H,-4.9291296518,-3.9519869306,0.862809982\H,-3.2293356652,-4  
.4464520683,0.7943186363\H,-4.437482884,-5.486480247,4.7719349149\H,-3  
.7260250171,-6.168032132,3.2999322347\H,-5.393996822,-5.5918916016,3.2  
901571444\H,1.1177194662,-3.549453888,4.8905128002\H,1.1684692674,-3.2  
022274954,3.153048686\H,1.6595165588,-4.7895446395,3.7581188088\H,-0.8  
624445845,-5.4708104096,6.0856058157\H,-0.3716098241,-6.7294371135,4.9  
499282984\H,-2.0833996193,-6.3179982278,5.1207910864\H,-0.6762596177,-  
4.8986453353,1.2214659701\H,-1.8420567285,-6.0624000584,1.8792066699\H  
,-0.1079401452,-6.3624254086,2.03768079\H,1.1341500186,-0.2817644376,2  
.4751798543\H,-1.4905751421,-1.9705452038,-0.4834678822\H,0.4717734024  
,-2.7159325066,-1.8008714032\H,2.771112116,-2.2583214003,-0.9792612712  
\H,3.1009259535,-1.0345847867,1.1625284413\H,-4.2727400202,1.495953265  
1,3.2229242314\H,-6.3149491283,2.5137629209,2.2515114934\H,-7.05036696  
65,1.8761333079,-0.0381539986\H,-5.7200947574,0.2405908476,-1.35336426  
59\H,-3.6807374976,-0.7680261772,-0.3805925859\\Version=EM64L-G09RevD.  
01\State=1-A\HF=-4368.054055\RMSD=2.247e-09\RMSF=1.130e-06\Dipole=-0.8  
190113,-3.0466648,-1.9364605\Quadrupole=-1.7689332,-2.9769592,4.745892  
4,-3.4976961,-0.1106965,-0.0433666\PG=C01 [X(C42H78Al1P1S1Si6)]\@

## Transition states for 1,3-hydrogen shift

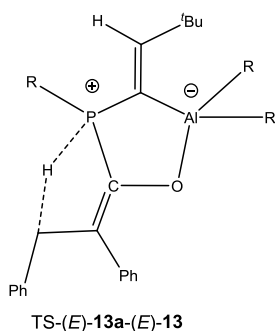

HF=-4045.0561116 au (1, -994.3075cm<sup>-1</sup>)

```
I\1\GINC-LUPUS09\FTS\RTPSS\TPSS\def2TZVP\C42H78Al1O1P1Si6\WURTHWE\09-Mar-2018\0\# tpsstps\def2tzvp Opt=(ts,noeigentest,gdiis,readfc,maxstep=8) emp=gd3bj freq pop=nbo geom=check guess=read int=(grid=ultrafine,acc2e=11)\(E)-cyclopropenone-FLP-adduct: TS from path H-Shift\0,1\C,-0.7336329233,1.1508542173,-0.4146158014\C,-0.4052649649,0.8257209251,0.9206774447\C,0.8882172676,1.1663337047,1.3863307688\C,1.7995886407,1.7994545254,0.5515108195\C,1.4409945586,2.1541610171,-0.7526321054\C,0.1650742898,1.8358453588,-1.2248980957\C,-1.3273785021,0.0854966011,1.7398982981\C,-2.1913042472,-0.8161482788,3.6554532166\P,-3.177441048,-1.8714470119,2.4671525526\C,-4.4317799502,-0.8688012849,1.6135296955\Si,-5.7544571964,0.0439816825,2.6379155409\C,-5.8850747322,1.7778040159,1.9137145075\C,-1.6028205431,0.3547748582,3.069115645\C,-1.3072945717,1.5840669115,3.8493703989\C,-1.2923319059,2.8225755661,3.1833973475\C,-1.076729274,4.0051681314,3.8828292268\C,-0.8745704932,3.979967545,5.2648154655\C,-0.9020885468,2.7600241332,5.9388166674\C,-1.1208346445,1.5732235333,5.241453178\O,-2.0079555099,-1.2710763112,4.824705578\Al,-2.1983050001,-3.2029111916,5.0173597086\C,-2.6107866832,-3.5280645478,6.946289972\Si,-2.499967512,-2.0218774097,8.0837235021\C,-2.9036375257,-2.4146771324,9.8932909411\C,-3.7244242389,-3.1104510585,3.6486027658\C,-5.0096228684,-3.5144950918,3.5340980477\C,-5.8317795428,-4.3854733251,4.4732921856\C,-6.3835028179,-3.4619067598,5.5872293453\C,-0.5521548437,-4.0155630047,4.213713771\Si,-0.7992043263,-5.2221814326,2.7788430803\C,-2.1944340585,-6.4667777848,3.0423585411\Si,-4.9320475958,-1.6716001076,-0.0521820196\C,-5.8738173496,-3.2883029201,0.1418571122\C,-5.991128683,-0.4331432947,-0.9990264577\C,-3.3765266876,-1.9988917522,-1.055902367\Si,1.0611063224,-3.0471644984,4.0007992138\C,1.3986077792,-2.543850172,2.2113721498\C,2.496879291,-4.1098824192,4.6282577\C,1.2112070592,-1.4505448871,4.9950587498\Si,-1.8823204837,-5.0786624245,7.7403645381\C,-1.6653981329,-6.5730067234,6.5983835112\C,-0.1721721511,-4.733783677,8.4658332292\C,-3.0401176986,-5.7460920464,9.0808409096\C,-1.262084255,-4.4323269647,1.1211565697\C,0.7507373454,-6.2702228837,2.4792104016\C,-3.7661716005,-0.7116465801,7.5893444922\C,-0.8040725172,-1.2001071393,8.0971949798\C,-7.017106944,-4.9739243635,3.6830771436\C,-5.0336938963,-5.5336451273,5.1031064885\C,-7.4390602587,-0.7958874417,2.5531713343\C,-5.210387065,0.1877075646,4.4255186927\H,-0.2726446222,-4.6950658349,5.0418753018\H,1.0616392617,-6.7962023562,3.3899132097\H,1.6055293998,-5.6844620922,2.1251789787\H,0.5324094698,-7.0296331408,1.71721
```

05305\H,-2.0601180043,-7.1090518993,3.9162701555\H,-2.2496166987,-7.11  
3725874,2.156640299\H,-3.155557999,-5.9537851216,3.1347589846\H,-0.734  
3938066,-3.5067849378,0.8807429512\H,-2.338906157,-4.2314691287,1.0912  
79183\H,-1.0455361646,-5.1562539909,0.324588379\H,0.4892655316,-0.6834  
022214,4.7047322135\H,2.2150175335,-1.0380487843,4.8269620496\H,1.1088  
395966,-1.6240782109,6.0703166173\H,2.3324847218,-1.9690432046,2.17159  
0869\H,0.605413323,-1.8982916021,1.8160575952\H,1.507048286,-3.3959340  
846,1.5327221877\H,2.3615766839,-4.3412733142,5.6928795097\H,3.4457609  
24,-3.5671212674,4.5305174645\H,2.597198947,-5.0593429783,4.095067965\  
H,-3.6987000542,-3.7228868189,6.9432589239\H,-0.0138040224,-1.87485523  
,8.4412293857\H,-0.5203012473,-0.8354055993,7.107420669\H,-0.822717320  
2,-0.3388111999,8.7772706813\H,-2.1801932379,-3.0902242016,10.36185877  
81\H,-2.8930932291,-1.4766166857,10.4640528788\H,-3.9000143326,-2.8573  
642196,10.006545227\H,-3.5465211317,-0.2680509228,6.61575443\H,-4.7830  
992392,-1.1206806659,7.5519690113\H,-3.7674346621,0.0983769133,8.33004  
2737\H,-4.021253438,-5.9780690736,8.6458893861\H,-2.6381580035,-6.6805  
654288,9.492756577\H,-3.2013099252,-5.0552196963,9.9115201455\H,-2.600  
1027666,-6.8591046313,6.1055380408\H,-0.9050651205,-6.4390811497,5.824  
5047002\H,-1.3521220513,-7.4233639862,7.2186344686\H,-0.2021869622,-4.  
0274993823,9.3023150894\H,0.2766448655,-5.6646404298,8.8337486446\H,0.  
501982992,-4.3197645329,7.7060837314\H,-5.617154688,-3.1219098957,2.71  
48045134\H,-4.0865806921,-5.1841769833,5.5185490883\H,-4.8143195066,-6  
.3091617486,4.3650486731\H,-5.6091951708,-5.9892885932,5.9169019226\H,  
-5.5661375905,-3.0421324372,6.1799486885\H,-7.0437349337,-4.0314205043  
,6.2517852248\H,-6.9567710908,-2.6302671969,5.1643399808\H,-6.66356092  
87,-5.6069484016,2.8619442688\H,-7.6417995158,-4.1796458734,3.25760571  
83\H,-7.6463670095,-5.5847045343,4.3396033674\H,-2.0357190737,-1.67428  
31261,1.5556154151\H,-3.774373651,-0.0552272573,1.256826813\H,-4.30625  
98459,0.8005442141,4.5190181621\H,-5.0067289282,-0.7902145416,4.869779  
9432\H,-5.9905106241,0.6685926556,5.0279134332\H,-4.9166225746,2.28994  
16887,1.9692693329\H,-6.6073521972,2.3758358742,2.4828418227\H,-6.2063  
565124,1.7753437237,0.8672564673\H,-7.428049996,-1.795649679,2.9981288  
691\H,-7.8075030084,-0.890319698,1.526153616\H,-8.1705334335,-0.197300  
5486,3.1103986755\H,-2.7396947934,-2.7650860501,-0.6027282227\H,-2.770  
124477,-1.0944476595,-1.1709779812\H,-3.6510137555,-2.3483095615,-2.05  
9247912\H,-5.2631235922,-4.0592900346,0.6244874377\H,-6.1458685189,-3.  
6606319805,-0.8540834017\H,-6.7990681629,-3.1775614948,0.7167886967\H,  
-5.4537897814,0.5088549197,-1.1581848447\H,-6.9351384448,-0.2011338748  
, -0.4956001107\H,-6.2357798875,-0.8441899741,-1.9863475507\H,1.1646141  
67,0.9083414527,2.4040216332\H,-1.7142599789,0.8787906061,-0.794812387  
7\H,-0.1208912316,2.1013646463,-2.2392731724\H,2.1520972901,2.66269681  
64,-1.3970027453\H,2.7933808644,2.0342815385,0.9238448196\H,-1.1422458  
699,0.6347233501,5.7787621342\H,-0.7520050099,2.7254007567,7.014440449  
3\H,-0.7033659387,4.9040559609,5.8097196006\H,-1.0699057651,4.95083210  
69,3.3477750817\H,-1.456382563,2.8508549165,2.1114242681\\Version=AS64  
L-G09RevD.01\State=1-A\HF=-4045.0561116\RMSD=3.546e-09\RMSF=9.644e-07\  
Dipole=-1.7170853,0.7957526,-1.0032639\Quadrupole=2.3617104,-0.9686097  
, -1.3931007,4.9850757,4.6429949,-0.5483403\PG=C01 [X(C42H78Al1O1P1Si6)  
]]@



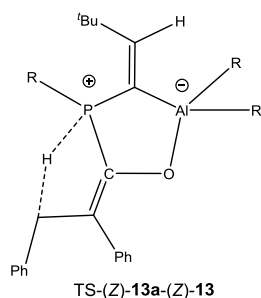

HF=-4045.0673287 au (1, -773.9607 cm<sup>-1</sup>)

1\1\GINC-LUPUS04\FTS\RTPSSSTPSS\def2TZVP\C42H78Al1O1P1Si6\WURTHWE\19-Fe  
b-2018\0\# tpsstps\def2tzvp Opt=(ts,noeigentest,readfc,maxstep=6) fr eq pop=nbo  
emp=gd3bj geom=check guess=read int=(grid=ultrafine,acc2e=1 1)\(Z)-FLP-  
Cyclopropenone-adduct TS H-shift\0,1\C,-1.0975582508,1.4739167665,-0.406139056\C,-  
0.7913524679,0.6423842514,0.6967158018\C,0.4920217492,0.0419884551,0.7386224376\C  
,1.4136 230318,0.264015365,-0.2752398405\C,1.107858686,1.1284324631,-1.3320176  
251\C,-0.1471774078,1.7420262573,-1.3841798765\C,-1.8026168352,0.35573  
48751,1.6727826519\C,-1.6255081615,0.1441229668,3.0229883082\C,-2.6539  
085288,-0.7749138016,3.4360546549\P,-4.2658609605,-0.7504586414,2.5312  
188157\C,-5.4461663704,-0.000184614,3.7279161666\Si,-7.3097133881,-0.3  
445245623,3.414091064\C,-7.8352170267,0.4626182029,1.7953870708\C,-0.5  
386353093,0.618779772,3.9094446083\C,-0.2677837683,0.0396467429,5.1623  
798253\C,0.7321776625,0.5565953268,5.9830298238\C,1.4753149102,1.66529  
44349,5.5801866268\C,1.202948163,2.2622472133,4.3469627209\C,0.2084050  
772,1.7471819785,3.523316744\O,-2.5189512483,-1.7105122213,4.306576736  
4\Al,-3.493451923,-3.3292452976,4.0559641058\C,-4.8308068516,-3.598451  
0043,5.507736819\Si,-4.8493157281,-2.7114688533,7.161709353\C,-3.80260  
1745,-1.1369974912,7.2412664183\C,-2.0750656918,-4.6930001286,3.693498  
7161\Si,-1.5511439146,-5.010822885,1.9173841775\C,-1.2747232285,-3.402  
6367784,0.9681807785\C,-4.4505659301,-2.5256428537,2.4033501598\C,-4.9  
317271878,-3.2069762929,1.346489212\C,-5.3902656927,-2.8197908772,-0.0  
496306888\C,-4.7071295816,-3.7981772361,-1.0339245307\Si,-0.601636151,  
-4.4664981272,4.8437302102\C,0.250951329,-6.1148094205,5.2116802224\C,  
-1.1296600142,-3.8198547143,6.5370858486\C,0.6627379859,-3.2575947975,  
4.1291093992\C,-6.9186652065,-3.0354448974,-0.1369148774\C,-5.03728470  
14,-1.3900293116,-0.4707313811\Si,-4.999136693,1.8753219893,3.90767378  
16\C,-6.4462713232,2.9358136021,4.4857906718\C,-3.6525457384,2.1040612  
48,5.1974698839\C,-4.4726350676,2.5674907675,2.2382077983\C,-7.7182421  
928,-2.1810135599,3.4140902625\C,-8.3546442744,0.3710810025,4.81648691  
89\Si,-5.3743637478,-5.3917321562,5.5588758689\C,-4.1026993355,-6.5356  
678749,6.3590290063\C,-7.0125489016,-5.6365347216,6.475783546\C,-5.675  
2128445,-5.9882728224,3.7869824646\C,-4.3353091921,-3.774699814,8.6364  
658945\C,-6.6232147029,-2.1335554003,7.4928107895\C,0.0604432121,-5.99  
67209537,1.7289146436\C,-2.7968022085,-6.1443735945,1.0515193478\H,-2.  
5327709382,-5.6427348969,4.0231805223\H,-0.0240102144,-6.9925366809,2.  
1794368028\H,0.9389556761,-5.5073248179,2.1602877678\H,0.2581938436,-6  
.1389378498,0.6578447215\H,-2.7825891446,-7.1281804306,1.5382387679\H,  
-2.5137764657,-6.2945888287,0.0020714495\H,-3.8288585355,-5.7887727979  
,1.0673210011\H,-0.4527627581,-2.837576561,1.4209522395\H,-2.152967373  
1,-2.7513535387,0.9608691831\H,-0.9931881228,-3.6051501247,-0.07270112

\H,-1.6355890274,-2.8523923941,6.4788532957\H,-0.2581744446,-3.7010445  
351,7.1934254847\H,-1.8141441192,-4.524896819,7.0204291278\H,0.1920720  
364,-2.3142508033,3.8368847992\H,1.1735438866,-3.6630287578,3.24959698  
09\H,1.4300508623,-3.0219282341,4.8768204272\H,-0.4635203914,-6.830840  
8248,5.6374984746\H,1.0495339755,-5.9708557222,5.9510809728\H,0.695513  
8895,-6.575075741,4.3250040715\H,-5.683191183,-3.1168944618,4.99022885  
5\H,-4.9901079776,-4.6430986841,8.7686157883\H,-3.3058622985,-4.136801  
3056,8.555260338\H,-4.4011558928,-3.1724216839,9.5518039798\H,-7.32856  
7796,-2.970530399,7.5288354327\H,-6.6923731969,-1.5946372738,8.4462129  
238\H,-6.9669016363,-1.4516484531,6.7060783787\H,-2.7268522492,-1.3343  
011427,7.2376349161\H,-4.0062465871,-0.4574776329,6.4085287656\H,-4.03  
52675915,-0.5975238501,8.1688693555\H,-7.8089576149,-5.0228868304,6.03  
71219207\H,-7.3314680015,-6.6850582566,6.4152725239\H,-6.9392067772,-5  
.3755118359,7.5375151673\H,-6.4419567268,-5.3773634566,3.2949957784\H,  
-4.7655963833,-5.9411177987,3.1766370578\H,-6.0200842384,-7.0297649852  
,3.7732952812\H,-3.9591272408,-6.3079027759,7.4201133694\H,-4.44276335  
58,-7.5766081878,6.2872007591\H,-3.1238924619,-6.4744224366,5.87280586  
82\H,-4.9990099977,-4.2899845769,1.4806222204\H,-7.4556295779,-2.32418  
50398,0.4962821401\H,-7.1903483738,-4.0484731097,0.179774118\H,-7.2542  
324802,-2.8995156979,-1.1716090501\H,-5.5461405318,-0.6408837778,0.142  
5270036\H,-5.3480049644,-1.2303467703,-1.5095268141\H,-3.958725082,-1.  
2105256444,-0.4066727147\H,-4.9712665648,-4.8351959285,-0.803932492\H,  
-3.6181612802,-3.7045763537,-0.9887109304\H,-5.033175816,-3.5793358687  
, -2.0569128115\H,-3.6274663401,0.0771064368,1.507196401\H,-5.227502868  
4,-0.4889412232,4.6920253789\H,-7.6801190095,-2.5717719201,4.437228231  
6\H,-7.0573904916,-2.7888217526,2.7962758972\H,-8.7483339806,-2.310228  
4812,3.056589134\H,-7.837412252,0.3522433745,5.7813567355\H,-9.2519499  
876,-0.2518226924,4.920058572\H,-8.6813387957,1.3968694745,4.631063792  
8\H,-7.3176854327,0.0505349941,0.9237195238\H,-7.6492203735,1.54260552  
51,1.8107505626\H,-8.9109051079,0.3159580346,1.6384255838\H,-2.7641205  
136,1.490366343,5.0328407423\H,-4.0339813775,1.8797495196,6.2000129335  
\H,-3.3292118102,3.1528714492,5.1951248949\H,-3.5067280239,2.173877896  
9,1.9031221164\H,-4.3818905992,3.6580178415,2.3187198346\H,-5.21410739  
13,2.352924275,1.4593933923\H,-6.8302006685,2.6422148763,5.4667899306\  
H,-7.2821903118,2.9584758451,3.7800604785\H,-6.0658561927,3.9622294281  
,4.5742257185\H,-2.0896893204,1.913429359,-0.4644819597\H,0.7406081668  
, -0.6083784125,1.5714769474\H,2.3846224923,-0.2226719771,-0.2362680736  
\H,1.8382961163,1.3126634197,-2.1146266679\H,-0.392458725,2.4070611495  
, -2.2079312075\H,-0.8356481599,-0.8218871829,5.4870760128\H,0.92942869  
23,0.0866729372,6.942734255\H,2.2547953219,2.0660534653,6.2220850376\H  
,1.7651519017,3.1355613236,4.0277751894\H,-0.0046725645,2.2242813622,2  
.5727754007\\Version=AS64L-G09RevD.01\State=1-A\HF=-4045.0673287\RMSD=  
1.038e-09\RMSF=5.112e-07\Dipole=-0.8635109,1.4868129,-0.8973357\Quadru  
pole=3.4353863,-3.0808647,-0.3545216,2.4180573,4.6892344,0.6500549\PG=  
C01 [X(C42H78Al1O1P1Si6)]\@

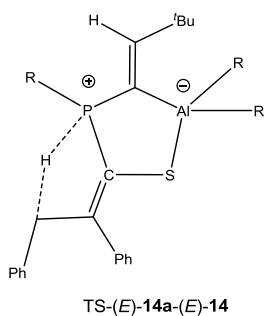

HF=-4368.0243616 au (1, -724,5247cm<sup>-1</sup>)

```

1\1\GINC-LUPUS09\FTS\RTPSSSTPSS\def2TZVP\C42H78Al1P1S1Si6\WURTHWE\02-Fe
b-2018\0\#\ tpsstps/def2tzvp Opt=(ts,noeigentest,readfc,maxstep=7) fr
eq pop=nbo geom=check guess=read emp=gd3bj\|(E)-FLP-thiocyclopropenone-adduct,
TS H-shift P->C\|0,1\C,-0.1968983935,0.7459510529,-0.056348811
9\C,-0.7438580984,0.9122174071,1.2411075091\C,-0.5976129199,2.17807649
72,1.8683790884\C,0.0386609802,3.224913645,1.2162207218\C,0.6007173145
,3.0262422508,-0.0496327078\C,0.4941967381,1.7780944449,-0.6748722\C,-
1.5279868832,-0.1288413687,1.8221577504\C,-1.5580526442,-0.4869015421,
3.1660941095\C,-2.6965010893,-1.2472074266,3.5669199344\P,-4.014932696
7,-1.1426029292,2.3394658022\C,-4.5608592736,0.5703954455,2.0368543651
\Si,-5.4482828929,1.5079461455,3.4455184666\C,-4.5583828258,3.16276777
78,3.5981714736\C,-0.4607952311,-0.1704621565,4.1218477802\C,-0.753329
606,0.2722023034,5.4201272054\C,0.2690373533,0.6369397641,6.2938283754
\C,1.601154422,0.5538895703,5.8879264592\C,1.9031977985,0.1074324515,4
.5998654645\C,0.8820305258,-0.2479534802,3.7237388503\S,-2.873833987,-
2.1990214806,4.9534136079\Al,-4.3118875253,-3.8201178977,3.8399925626\
C,-5.3750598588,-4.8065800695,5.2263471736\Si,-5.0146907433,-4.3928142
03,7.0315667728\C,-5.9992166305,-5.4515002536,8.2564732619\C,-5.272519
0411,-2.2911296631,2.8692578484\C,-6.5377899497,-1.8652297562,2.643730
2442\C,-7.8639779107,-2.5290098438,2.9820287493\C,-8.1797374439,-2.227
6511821,4.465602037\C,-3.079478089,-4.8731512922,2.6517839642\Si,-3.34
07731436,-4.8099618387,0.780710513\C,-5.0021519657,-4.1175425568,0.191
0229121\Si,-5.1219372933,0.8676660071,0.2284647198\C,-6.8292818716,0.1
911050522,-0.17531734\C,-5.0872737469,2.7323786608,-0.0448616853\C,-3.
8986108227,0.0753541101,-0.9588089126\Si,-1.2510984943,-5.0482882355,3
.0907192394\C,-0.1853479841,-3.517932761,2.8104948645\C,-0.4516551663,
-6.4628622411,2.1109440422\C,-0.9895412386,-5.5004926689,4.9029129037\
Si,-5.6771676726,-6.6265271112,4.8453469699\C,-6.0046683776,-6.9830153
439,3.0060688246\C,-4.2248133409,-7.7051994542,5.3802158394\C,-7.25283
65027,-7.2717764113,5.6739083405\C,-2.0339634633,-3.7807931551,-0.1221
818484\C,-3.303410123,-6.5624631044,0.0644603131\C,-5.540576518,-2.610
986478,7.3862357077\C,-3.2131557072,-4.5879625794,7.5515247559\C,-8.97
36956971,-1.9096877586,2.1099610107\C,-7.8374730126,-4.0416451308,2.73
24225946\C,-7.2717868939,1.822159056,3.0870603569\C,-5.3015636763,0.60
30661631,5.0822897292\H,-3.439543793,-5.8902151354,2.9038500344\H,-4.1
187645971,-7.1684601847,0.4779317882\H,-2.3654500669,-7.0863303378,0.2
678868593\H,-3.4405699339,-6.5268359558,-1.024090326\H,-5.8517356842,-
4.5810787021,0.7012468827\H,-5.0980178314,-4.3364955166,-0.8808752039\
H,-5.0932221115,-3.035730286,0.3216039601\H,-1.9828375688,-2.747901149
8,0.2439190008\H,-2.2872705777,-3.7405448818,-1.1896243683\H,-1.029269

```

0261,-4.2081088119,-0.0367375818\H,-1.272836102,-4.6782313444,5.565650  
1268\H,0.0766552446,-5.7021344382,5.0699924343\H,-1.5461202983,-6.3904  
826358,5.2125750258\H,-0.416448495,-2.9566567905,1.9023580952\H,0.8656  
528327,-3.8304214973,2.7555476292\H,-0.2761935634,-2.8367753293,3.6609  
500459\H,-1.00931208,-7.4009347443,2.2177417146\H,0.5611393966,-6.6351  
592933,2.4983384666\H,-0.3588390641,-6.2495734497,1.0403532304\H,-6.37  
78855242,-4.3569978172,5.1145079192\H,-2.8176472434,-5.579005243,7.309  
2355214\H,-2.5488535475,-3.8448967574,7.0989806801\H,-3.1494384576,-4.  
4608508834,8.6399992302\H,-5.6879478615,-6.5021891571,8.2509521933\H,-  
5.8300833155,-5.0660945838,9.2707051549\H,-7.0772147379,-5.4185228693,  
8.063399068\H,-5.0686555996,-1.8945756615,6.7064953211\H,-6.6275235908  
,-2.491683185,7.3003285929\H,-5.2613183277,-2.3321370023,8.4103386652\  
H,-8.0924609647,-6.5901954888,5.4857333255\H,-7.5184543949,-8.24405259  
5,5.2385634184\H,-7.1661845519,-7.4025867905,6.75550277\H,-7.067935550  
9,-6.8566072272,2.7734070497\H,-5.4396689244,-6.3601395206,2.307769277  
3\H,-5.7483971728,-8.0286062962,2.7908358912\H,-3.9755799188,-7.570041  
5064,6.4388695305\H,-4.467517622,-8.7642413954,5.2280582616\H,-3.32452  
59357,-7.4866247559,4.7961380813\H,-6.6819812045,-0.8800969109,2.18961  
24093\H,-6.9740601815,-4.5085142951,3.2050600297\H,-7.7904814649,-4.25  
30225627,1.6602193382\H,-8.7417062526,-4.5112571301,3.1362516689\H,-7.  
4063652569,-2.6359791825,5.1194998337\H,-9.1451633136,-2.6684049917,4.  
74088618\H,-8.2328138848,-1.1475497928,4.6407040315\H,-8.780962156,-2.  
0820988224,1.0460275707\H,-9.0517841684,-0.8287081098,2.2726482313\H,-  
9.9415973533,-2.3583590571,2.3589217617\H,-3.0298368411,-1.2465208618,  
1.2669170521\H,-3.5755754755,1.065672507,2.0099371113\H,-4.2586550615,0  
.514169613,5.4030315197\H,-5.7163345524,-0.4068846156,5.0288955482\H,-  
5.8448071229,1.1520199035,5.8613864546\H,-3.5056858064,3.0101327549,3.  
8661644781\H,-5.0153440043,3.7743003073,4.385688187\H,-4.5854489757,3.  
7405234705,2.6684284538\H,-7.8429323402,0.891717742,3.0071426914\H,-7.  
4292327395,2.3954012776,2.1672388006\H,-7.7021178202,2.4016355657,3.91  
34968018\H,-3.9111597741,-1.0189252992,-0.9061985929\H,-2.8744157577,0  
.4100624567,-0.7686521131\H,-4.1635466783,0.355863361,-1.986374192\H,-  
6.8426531463,-0.9038143972,-0.1502252906\H,-7.094688023,0.4983496566,-  
1.1952807216\H,-7.612688633,0.5564115257,0.4946449522\H,-4.0916538301,  
3.139708043,0.1672461347\H,-5.8120702804,3.2689310605,0.5766981068\H,-  
5.3206700098,2.957642726,-1.0927768728\H,-1.0022164181,2.315428587,2.8  
666373909\H,-0.3202799692,-0.2155201401,-0.5470615379\H,0.930922019,1.  
6258876088,-1.6579668355\H,1.1157607689,3.8418278908,-0.5491892373\H,0  
.1219296973,4.1942630692,1.7003139757\H,1.1192388556,-0.6021300793,2.7  
259397158\H,2.9381862384,0.0310742764,4.2784515227\H,2.3986597005,0.83  
10648886,6.5714652754\H,0.0236044687,0.9838066595,7.2938616786\H,-1.78  
76322111,0.3391400306,5.7443654234\Version=AS64L-G09RevD.01\State=1-A  
\HF=-4368.0243616\RMSD=1.881e-09\RMSF=3.594e-06\Dipole=-0.4026307,2.47  
23878,-0.8589225\Quadrupole=4.6269801,-1.3454464,-3.2815337,4.2733547,  
-0.0810245,-1.7162437\PG=C01 [X(C42H78Al1P1S1Si6)]\@

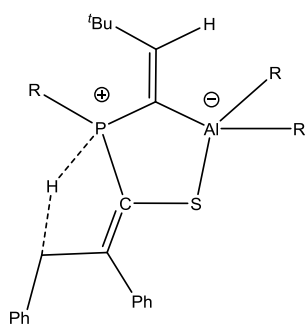

TS-(Z)-14a-(Z)-14

HF=-4368.0167373 au (1, -744.8626 cm<sup>-1</sup>)

```

1\1\GINC-PALMA311\FTS\RTPSSSTPSS\def2TZVP\C42H78Al1P1S1Si6\WURTHWE\07-
Mar-2018\0\#\# tpsstps/def2tzvp Opt=(ts,noeigentest,readfc,maxstep=6) f
req pop=nbo emp=gd3bj geom=check guess=read int=(grid=ultrafine,acc2e=
11)\(Z)-cyclopropenthione-FLP: TS from Path H-shift
\\0,1\C,4.9600581788,2.5878218933,0.7514038513\C,4.7061065884,1.199271
651,0.6223372474\C,5.8107086753,0.3212073315,0.7211199007\C,7.10357907
88,0.8067292115,0.8762265653\C,7.3307957603,2.1781496444,1.0167663505\
C,6.2477221772,3.0600307754,0.9727689679\C,3.3730777998,0.6721398967,0
.4784689154\C,1.1607093438,0.5847075506,-0.404983374\P,1.0797559797,-0
.963119291,0.6053511314\C,2.0139862531,-2.1617108423,-0.4221525967\Si,
1.1998502612,-2.7873687564,-2.0421616842\C,1.6245593164,-4.5814038702,
-2.4392498348\C,2.4511660674,1.1833808966,-0.430257942\C,2.745639234,2
.2824032306,-1.402896742\C,2.2535492831,3.5794975192,-1.2220755377\C,2
.5709444807,4.5914397743,-2.1255748731\C,3.385155311,4.3178942698,-3.2
254556749\C,3.8848459501,3.0286093602,-3.4108597012\C,3.5695173323,2.0
182679739,-2.5035776593\S,-0.1706889671,1.1649776791,-1.251946397\Al,-
1.8990742166,0.2667746988,0.1486002796\C,-3.4442919231,-0.6275223204,-
0.7636644885\Si,-3.7782637839,-0.5041610844,-2.6211720872\C,-2.3629816
684,0.2040012553,-3.6594545496\C,-2.3328676702,1.7715569018,1.39934283
21\Si,-1.3219955396,1.9151615608,2.9718995085\C,0.5312578784,2.0721826
996,2.6406921671\C,-0.6620926404,-1.1816098813,0.8889472608\C,-1.28710
35678,-2.1748351097,1.5588120927\C,-0.7965086682,-3.3944331652,2.31685
09855\C,-1.8287737878,-3.7290725987,3.4123331773\Si,-2.6572619709,3.41
53325473,0.5436305052\C,-4.0103278365,4.4054160241,1.4200432636\C,-3.2
358604939,3.1691171435,-1.2367137178\C,-1.1146501875,4.4966919637,0.43
85057002\C,-0.7173733418,-4.5761744561,1.3249461585\C,0.5626801304,-3.
1460961126,2.9702607287\Si,3.322857268,-3.2728750232,0.4531579113\C,4.
7508401276,-3.2860254796,-0.7834116748\C,3.9505060055,-2.5190518731,2.
0641096526\C,2.8427771376,-5.0564868629,0.8151831729\C,-0.667376615,-2
.6851824198,-2.0290015947\C,1.8784962989,-1.6813376123,-3.4061941332\S
i,-5.0244080718,-0.6341355452,0.2595365241\C,-5.9019306352,1.034629458
1,0.3325422005\C,-6.2760951055,-1.9047406985,-0.3795575143\C,-4.711145
6684,-1.1506925624,2.0580454268\C,-5.2873877749,0.5332544887,-3.102804
5965\C,-4.1241190772,-2.2454886671,-3.2808623547\C,-1.8117828341,3.411
1840747,4.027120158\C,-1.5904332631,0.4181181386,4.0961049341\H,-3.334
5234589,1.4584362748,1.7495224244\H,-2.8748904792,3.3830897635,4.29402
5908\H,-1.6186966819,4.3679157955,3.5297857504\H,-1.2360204224,3.40436
16796,4.9619416314\H,-2.6376389922,0.3399381997,4.4128771224\H,-0.9786

```

129193,0.5088744189,5.0028442693\H,-1.3192650795,-0.5168025444,3.59717  
07286\H,0.7556660634,2.7924659752,1.8480591346\H,0.9853650634,1.118198  
1216,2.3547539278\H,1.0460514241,2.4068291386,3.5500139222\H,-4.075115  
3739,2.4705869703,-1.2906846308\H,-2.4341526247,2.781970498,-1.8760744  
424\H,-3.5648921165,4.1207305316,-1.6728856642\H,-0.3558776563,4.00284  
23369,-0.1767354765\H,-0.6723617928,4.7251089009,1.4136318614\H,-1.362  
1965847,5.4488303061,-0.0475732855\H,-4.9529054114,3.8487754941,1.4770  
948037\H,-4.2114530489,5.3322739899,0.8672824741\H,-3.7256908772,4.680  
8348908,2.4401572201\H,-3.0972168806,-1.6768170172,-0.6828083798\H,-6.  
2140902124,0.1830408199,-2.6369004548\H,-5.1708062924,1.5960787191,-2.  
8693789795\H,-5.4185378039,0.4522378347,-4.1900299039\H,-3.310890685,-  
2.9391237054,-3.0420239307\H,-5.0445137728,-2.6576453385,-2.8532709345  
\H,-4.2417634485,-2.2306811087,-4.3719117989\H,-2.1844018016,1.2634923  
093,-3.4464526599\H,-1.4151458751,-0.3265489548,-3.5286847609\H,-2.638  
5053632,0.1305976458,-4.7200440536\H,-5.8326269395,-2.9068245997,-0.42  
9122657\H,-7.1362995092,-1.9567630582,0.300451276\H,-6.6589366214,-1.6  
628950512,-1.3766206777\H,-4.4823157449,-2.2204202323,2.1353915505\H,-  
3.8975361304,-0.5997419329,2.5416255929\H,-5.6203939357,-0.9747958458,  
2.647613549\H,-6.8295028174,0.9250464846,0.9090784273\H,-5.2961583651,  
1.7963957053,0.8316125117\H,-6.1702866172,1.4182556423,-0.6557859056\H  
,-2.378803618,-2.1176843868,1.5634655518\H,0.0223379883,-4.3789074789,  
0.5442928131\H,-1.6874138752,-4.7446045513,0.8449232911\H,-0.431683355  
2,-5.4953605497,1.8500019915\H,1.322084333,-2.9005317912,2.2230837296\  
H,0.9062594748,-4.0396428452,3.5032068819\H,0.5108259009,-2.3136133114  
,3.6789153161\H,-2.8110023789,-3.9337331761,2.9725770211\H,-1.93776776  
84,-2.89709306,4.1156729127\H,-1.513103564,-4.6162092242,3.9723668439\  
H,2.1708125948,-0.4530180901,1.4399048358\H,2.7440281465,-1.4399505165  
,-0.827937426\H,-1.0228340427,-1.6718600265,-1.8262081352\H,-1.1212653  
298,-3.3495804716,-1.2891229643\H,-1.0342310953,-2.9768841537,-3.02033  
59694\H,1.6165791775,-0.631480887,-3.231948676\H,1.4736785148,-1.96728  
48589,-4.3843722685\H,2.9718936628,-1.7481387492,-3.4654926343\H,1.121  
9974101,-5.2764921141,-1.7581124026\H,2.6949990883,-4.8061864331,-2.42  
75834307\H,1.2554904337,-4.794948344,-3.4508427474\H,3.3462435488,-2.8  
076319689,2.9289729855\H,3.9924363958,-1.426410802,2.0237386196\H,4.96  
90336938,-2.888260568,2.2421346943\H,2.0632972719,-5.1404772564,1.5760  
664971\H,3.7373710517,-5.5575213085,1.208986607\H,2.5194931886,-5.6091  
406886,-0.0701407931\H,5.1165597136,-2.2705470536,-0.975074185\H,4.467  
1477398,-3.7206500773,-1.7477159279\H,5.5895493005,-3.8739374881,-0.39  
11756988\H,4.130720184,3.2842933848,0.7025675193\H,5.6391027619,-0.746  
7938804,0.6470389314\H,7.9372317545,0.110371273,0.9131559675\H,8.33840  
22389,2.5544380205,1.1677786591\H,6.4116358627,4.1279860548,1.09115635  
38\H,1.6318785578,3.7985699049,-0.3603246779\H,2.1815234386,5.59368897  
83,-1.9690658359\H,3.6318531833,5.1056211812,-3.9316413126\H,4.5237472  
52,2.8085211619,-4.2617050597\H,3.9670400717,1.0166898266,-2.643062309  
5\|Version=EM64L-G09RevD.01|State=1-A|HF=-4368.0167373|RMSD=4.961e-09\  
RMSF=3.134e-06|Dipole=1.3006242,-1.4354034,-0.0289668|Quadrupole=-4.24  
70108,8.1461032,-3.8990924,-0.9299524,-4.3477085,-5.1973427|PG=C01 [X(  
C42H78A11P1S1Si6)]\|@

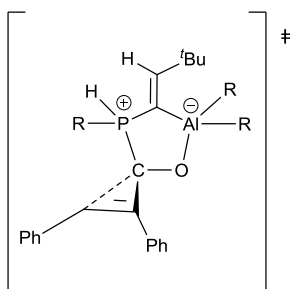

TS for Carbene-formation to give (*E*)-**13**

HF=-4045.0799094 au (1, -51.4854cm<sup>-1</sup>)

```

1\1\GINC-LUPUS06\FTS\RTPSSTPSS\def2TZVP\C42H78Al1O1P1Si6\WURTHWE\12-Ma
r-2018\0\#\# tpsstps/def2tzvp Opt=(readfc,ts,noeigentest,maxstep=8) em
p=gd3bj freq pop=nbo int=(grid=ultrafine,acc2e=11) geom=check guess=re
ad\cyclopropenthione-FLP-adduct: TS for cyclopropene-ring opening\0,1\C,0.41127
42286,-0.3956116951,0.0647444726\C,-0.0321613555,-0.0041791111,1.34713
53181\C,0.8811742073,0.6678836433,2.1934913048\C,2.1828324263,0.915168
4749,1.7750221527\C,2.5986277743,0.5430281071,0.4934743448\C,1.7005684
147,-0.0993782356,-0.3627504474\C,-1.3400895441,-0.3448298223,1.814390
0237\C,-2.3581064727,0.2254171699,2.4568858854\C,-2.6226893288,-0.9905
928804,3.2193021986\P,-2.7913230181,-2.5963519862,2.4005807705\C,-3.34
79587529,-2.561771203,0.6913643664\Si,-5.1316046963,-1.9676588201,0.32
13816697\C,-4.9661888079,-0.729809705,-1.0862687548\C,-2.8823119319,1.
575267803,2.6458669035\C,-2.3975239554,2.6323102033,1.8566450487\C,-2.
898371406,3.9191407684,2.0231003983\C,-3.8836250303,4.1717774771,2.982
2097441\C,-4.3677470099,3.127451198,3.7716639225\C,-3.8753005277,1.836
3499041,3.6023935363\O,-2.5667579572,-1.0656200476,4.5215612593\Al,-2.
7502683985,-2.7322433927,5.3905412543\C,-4.0909289572,-2.5983040151,6.
8767238414\Si,-5.0656457028,-0.9889017455,6.9702711502\C,-6.4249154369
,-0.9937021532,8.2922588782\C,-3.6160546673,-3.5301944913,3.6710470093
\C,-4.5740041939,-4.4026305041,3.2998228849\C,-5.340459529,-5.40000935
16,4.1518030676\C,-6.6433791762,-4.7301043212,4.6449982329\C,-0.892894
0092,-3.3598631974,5.7785522058\Si,0.1127476709,-4.3361938141,4.536645
6219\C,-0.903988204,-5.7352701091,3.7585796259\Si,-2.6968512543,-4.053
1703073,-0.3215560952\C,-3.4919653694,-5.6813276524,0.1712063173\C,-3.
0194682195,-3.6754864531,-2.1387923575\C,-0.8399296584,-4.2223442696,-
0.0764579036\Si,0.1524399262,-2.1038501853,6.7265455641\C,1.6146960044
,-1.4047280467,5.7499096852\C,0.8619066572,-2.8920486858,8.2945040768\
C,-0.8255739874,-0.5831777912,7.2567267207\Si,-3.7899547888,-3.4326840
49,8.5386176714\C,-2.5616039633,-4.8777301492,8.5230006425\C,-3.175569
9241,-2.2366191229,9.8669249251\C,-5.4046219721,-4.227359086,9.1305958
989\C,0.885988101,-3.2980327435,3.1498001855\C,1.5503915187,-5.2227880
285,5.395806961\C,-5.9885085674,-0.7835950764,5.3354092448\C,-4.056101
5444,0.5737225674,7.2728116391\C,-5.7131311571,-6.6034177875,3.2617756
498\C,-4.5076502848,-5.8996069292,5.3391750446\C,-6.2703416385,-3.3808
263967,-0.188637395\C,-5.9015072315,-1.1136778572,1.7972415112\H,-1.10
54921886,-4.1369943359,6.535268112\H,1.1880181944,-5.8830698367,6.1934

```

584988\H,2.259807212,-4.5191742382,5.8458895182\H,2.1083260449,-5.8409  
629462,4.6804545227\H,-1.242845247,-6.4310638734,4.5363203266\H,-0.287  
749963,-6.3071612249,3.0527039817\H,-1.7965896653,-5.3850329936,3.2308  
14171\H,1.8623060491,-2.9136059721,3.4604806533\H,0.2920096841,-2.4307  
688068,2.8432432472\H,1.0549319241,-3.9163923124,2.260497924\H,-1.0744  
832364,0.0451130363,6.3953360804\H,-0.2360021905,0.0224906455,7.956914  
2353\H,-1.7638628433,-0.8410774755,7.7544906638\H,1.3024428525,-0.9527  
444529,4.8028257943\H,2.3858291116,-2.1496637053,5.5279778355\H,2.0838  
698349,-0.6171730788,6.3544291919\H,0.0756815427,-3.1343137224,9.01881  
6656\H,1.5576591849,-2.2012019713,8.7878805472\H,1.4075469733,-3.81682  
75368,8.075996872\H,-4.877028608,-3.2487280217,6.4465815392\H,-3.55180  
81501,0.564182631,8.2449322386\H,-3.2953393211,0.732642261,6.504105185  
3\H,-4.7347765764,1.437065582,7.2636911765\H,-6.0411390178,-1.09515315  
75,9.3130075478\H,-6.9726647146,-0.0431654787,8.2409730099\H,-7.149580  
6795,-1.7991146788,8.1253839286\H,-5.3121759936,-0.880835719,4.4827353  
72\H,-6.7636577567,-1.5511618733,5.2238307071\H,-6.4830556451,0.193206  
9605,5.2648811384\H,-5.7669517645,-4.9517196387,8.3894051059\H,-5.2416  
621339,-4.7729167045,10.0688089852\H,-6.2036512801,-3.50053927,9.30060  
86073\H,-2.7381542314,-5.5780174722,7.6988123178\H,-1.5180198646,-4.55  
55760365,8.4720069353\H,-2.6815305018,-5.4404459399,9.4583795137\H,-3.  
833726924,-1.3694684754,9.9890340252\H,-3.1255134181,-2.7523163215,10.  
8343794442\H,-2.1710637984,-1.861293951,9.6445994118\H,-4.8835160189,-  
4.4423556288,2.2493642422\H,-4.1750976972,-5.0734363308,5.9700236786\H  
,-3.6207059821,-6.4344283851,4.9874277261\H,-5.1008459641,-6.579140283  
6,5.9613071571\H,-6.4240331771,-3.8867903176,5.3045571421\H,-7.2528979  
529,-5.4551661086,5.1968394712\H,-7.2349205688,-4.3564816701,3.8013712  
205\H,-4.8163671464,-7.1046742716,2.8822610964\H,-6.3168221375,-6.2859  
658571,2.4031704791\H,-6.2950349104,-7.332833188,3.8357059906\H,-1.532  
7410727,-3.2113834888,2.381925884\H,-2.720637303,-1.7351061445,0.31127  
7037\H,-5.3063884891,-0.2599840485,2.136938959\H,-6.0265958692,-1.7977  
803997,2.6410787463\H,-6.8953760187,-0.7352198146,1.5270374023\H,-4.34  
67760799,0.1194309978,-0.7727605995\H,-5.9495682369,-0.3355750873,-1.3  
694193684\H,-4.5114241481,-1.1667398695,-1.981232823\H,-6.4290318516,-  
4.0929598583,0.6286875024\H,-5.9094457542,-3.9396356576,-1.0577259464\H  
,-7.2508122678,-2.9631638366,-0.4505331515\H,-0.6005857247,-4.6926816  
462,0.8822403566\H,-0.316015797,-3.2617196144,-0.1142998158\H,-0.42608  
21491,-4.8625564321,-0.8658593779\H,-3.2380492676,-5.9426043856,1.2040  
398377\H,-3.1029482579,-6.4794099228,-0.473863792\H,-4.5817066334,-5.6  
792837821,0.0789673215\H,-2.5230405758,-2.7464581321,-2.4431274638\H,-  
4.0830179175,-3.5816416576,-2.3792599823\H,-2.6112148018,-4.4848675539  
,-2.7565164732\H,0.5529780882,0.9728302812,3.1825537628\H,-0.277357899  
8,-0.9162765135,-0.5947879139\H,2.0154740145,-0.3899285362,-1.36145683  
94\H,3.6134842114,0.749014255,0.166475424\H,2.8749418641,1.4151292287,  
2.44727584\H,-4.2452044452,1.0269416199,4.2207080146\H,-5.1288844986,3  
.3185234574,4.5230116601\H,-4.2698283725,5.1786809757,3.1131626219\H,-  
2.5197456625,4.7298961736,1.4068040285\H,-1.6274351956,2.4321985516,1.  
1169859151\\Version=AS64L-G09RevD.01\State=1-A\HF=-4045.0799094\RMSD=6  
.757e-09\RMSF=8.715e-07\Dipole=-0.769447,-0.1164617,-2.4957049\Quadrup  
ole=-2.2419134,3.3579844,-1.116071,4.2934694,0.0276534,3.3445752\PG=C0  
1 [X(C42H78Al1O1P1Si6)]\@



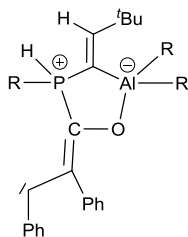

(*E*)-Carbene for the formation of (*E*)-**13**

HF=-4045.0840605 au (0)

```

1\1\GINC-LUPUS04\FOpt\RTPSSSTPSS\def2TZVP\C42H78Al1O1P1Si6\WURTHWE\10-M
ar-2018\0\# tpsstps/def2tzvp Opt=(gdiis,maxstep=8,readfc) geom=check
guess=read emp=gd3bj freq pop=nbo int=(grid=ultrafine,acc2e=11)\cycl
opropenon-FLP-adduct: Carbene intermediate after ring opening\0,1\C,-0.4
757278404,0.1532890005,-0.0698840685\C,-0.2893118424,-0.0130146609,1.3
203205111\C,1.0243425416,-0.2430631217,1.7918254986\C,2.0924245265,-0.
3221260242,0.9067908028\C,1.8930693574,-0.1285004516,-0.4631208035\C,0
.6062176921,0.1240299955,-0.9435074639\C,-1.4155798951,-0.0546794856,2
.2190786215\C,-1.5589943625,0.5269249305,3.457235208\C,-2.4963262385,-
0.39281038,4.044632331\P,-3.2211322039,-1.3721970212,2.6200012194\C,-3
.9959025677,-0.7700574736,1.0718871258\Si,-5.3709025995,0.5527503376,1
.2051884192\C,-4.8065886365,1.9497106365,0.0708057813\C,-0.8732920292,
1.636604217,4.1289266263\C,-0.0972737139,2.5445922,3.3870238424\C,0.54
05085773,3.608590165,4.0160198217\C,0.4159623048,3.7881730913,5.395923
7482\C,-0.3604716771,2.8997866213,6.1405563723\C,-1.003442594,1.835126
753,5.5147602309\O,-2.61464885,-0.7947112846,5.2382561133\Al,-3.569512
098,-2.4702454802,5.4817254597\C,-4.6947151851,-2.1688138156,7.1117597
286\Si,-4.7089773916,-0.4311258239,7.8405785303\C,-6.0725957463,-0.220
3063016,9.1420672717\C,-4.4720793853,-2.201743989,3.6692582499\C,-5.70
83292834,-2.4033917948,3.1794741845\C,-6.9142805182,-3.0668695807,3.83
50957961\C,-7.7019098333,-1.980039613,4.6030956053\C,-2.1287264248,-3.
8683272772,5.4584502611\Si,-1.8630643931,-5.0060823667,3.9832699494\C,
-3.3774126196,-5.2882733858,2.8833546001\Si,-4.117445514,-2.1062376246
,-0.2926755303\C,-5.5176274797,-3.3413605141,-0.1046738011\C,-4.332620
2174,-1.163631087,-1.9136509224\C,-2.4942272961,-3.05507071,-0.3811936
188\Si,-0.5049224939,-3.3373822767,6.2461901819\C,0.3763592735,-1.9600
847614,5.2959223529\C,0.7513923758,-4.7461398645,6.4265321851\C,-0.817
0527251,-2.7501035981,8.0105465422\Si,-4.9020833494,-3.5255640733,8.40
75244152\C,-4.3163380546,-5.2512553513,7.8800814882\C,-4.0084399316,-3
.1748635432,10.0361264744\C,-6.7486631464,-3.7255196177,8.7750424738\C
,-0.4529828236,-4.440601312,2.8482467342\C,-1.4407214888,-6.7493456518
,4.5900246271\C,-5.1470740687,0.8600092327,6.531630989\C,-3.08547199,0
.1047991155,8.6415366037\C,-7.8317395195,-3.6417295975,2.7378301318\C,
-6.515394976,-4.2132201927,4.7733012312\C,-7.069763255,-0.0267117537,0
.6290974178\C,-5.4923550622,1.2202849742,2.9523120479\H,-2.5331199882,
-4.569453538,6.2105940851\H,-2.2350767506,-7.1245688266,5.2480859793\H
,-0.500890859,-6.7953771257,5.1470439776\H,-1.3626916514,-7.4414649788
,3.7416100157\H,-4.1682273769,-5.7988562529,3.4450771787\H,-3.09572512
93,-5.9420288779,2.047409962\H,-3.8112621638,-4.3724892492,2.475744795
9\H,0.5111175351,-4.444091549,3.3683710144\H,-0.5929497786,-3.43449847

```

73,2.4375053471\H,-0.3693850895,-5.1297340076,1.9982894196\H,-1.618583  
5838,-2.0091765258,8.0651097118\H,0.084492341,-2.2994938274,8.44398753  
53\H,-1.1018857579,-3.5961014113,8.6473682771\H,-0.0738157458,-0.98138  
12168,5.4838862445\H,0.3653813742,-2.1375577593,4.2160559177\H,1.42603  
7073,-1.9072057332,5.611218895\H,0.3337871949,-5.5894992496,6.98891939  
21\H,1.6218829803,-4.3765305309,6.9849093732\H,1.1168939329,-5.1315900  
994,5.4688446058\H,-5.6956029324,-2.1728845568,6.640208629\H,-2.810770  
1492,-0.5223162951,9.4957168866\H,-2.2519459409,0.0848405968,7.9320780  
43\H,-3.18741832,1.1352811988,9.0060668995\H,-5.9614014187,-0.87590621  
,10.0112487419\H,-6.070881504,0.815145593,9.5072827143\H,-7.0611701105  
, -0.4115510324,8.7065695935\H,-4.3917466907,0.9520017916,5.7485930032\  
H,-6.1034319686,0.628478218,6.0485593502\H,-5.2535116681,1.8436327815,  
7.0071907463\H,-7.294074508,-4.0224910061,7.8706280855\H,-6.9148570894  
, -4.5038941565,9.5305031534\H,-7.2000623573,-2.7989466805,9.1437313173  
\H,-4.6303732022,-5.5246071569,6.8662816991\H,-3.2275712492,-5.3592912  
503,7.9365807817\H,-4.7495602795,-5.9905049775,8.5667930812\H,-4.37323  
13854,-2.272183377,10.5365426398\H,-4.1651104963,-4.0173246701,10.7221  
932932\H,-2.9293205678,-3.062666765,9.8926081472\H,-5.9492208074,-2.03  
17865029,2.1775017706\H,-5.8028989491,-3.8888315166,5.5348071084\H,-6.  
0570044088,-5.027816952,4.2063099448\H,-7.3973991494,-4.6062503113,5.2  
914664576\H,-7.0917726044,-1.5384518019,5.3951517526\H,-8.603233479,-2  
.4108645542,5.0551805878\H,-8.0099168793,-1.1742500226,3.9270015849\H,  
-7.3220920131,-4.4245419916,2.1672717108\H,-8.14879225,-2.8605899443,2  
.0372723378\H,-8.7311049767,-4.07742357,3.1873715785\H,-2.4290990628,-  
2.4964433601,2.3345710412\H,-3.1799611158,-0.170051205,0.6493288891\H,  
-4.5377101085,1.6478017535,3.2800313546\H,-5.7735999099,0.4420004809,3  
.6657561761\H,-6.2443986206,2.017009256,3.0062488823\H,-3.8374427871,2  
.3449779346,0.3996350182\H,-5.5247209322,2.7784344429,0.0875187972\H,-  
4.7001106726,1.6236048637,-0.9695114289\H,-7.5105294922,-0.7760462554,  
1.2932472753\H,-7.049151059,-0.4428126199,-0.3837248941\H,-7.746930173  
3,0.8369714165,0.6145857766\H,-2.3766333395,-3.7542122546,0.4528486706  
\H,-1.6254342295,-2.3877430714,-0.3857274437\H,-2.4684286148,-3.645085  
6888,-1.3063332469\H,-5.3767068247,-3.9771946852,0.7742913664\H,-5.527  
7330089,-3.9936235989,-0.9877063319\H,-6.5004742606,-2.8671164059,-0.0  
29051496\H,-3.5129833953,-0.4543570967,-2.0783943242\H,-5.2732939713,-  
0.6045051642,-1.9566316028\H,-4.3304248123,-1.8697823241,-2.7531462497  
\H,1.1833553453,-0.3761672003,2.8572258098\H,-1.4740455502,0.338774127  
8,-0.4557744868\H,0.4429364956,0.2812990344,-2.0061788391\H,2.73297733  
82,-0.1753622483,-1.1499627275\H,3.0904775618,-0.5206649297,1.28788479  
64\H,-1.6057972423,1.1492523113,6.0983849154\H,-0.4677387348,3.0341588  
92,7.2132841341\H,0.9174250558,4.6183834835,5.8852425388\H,1.135793315  
5,4.3020293293,3.428518516\H,-0.0009986271,2.4114236903,2.3145151499\  
Version=AS64L-G09RevD.01\State=1-A\HF=-4045.0840605\RMSD=4.351e-09\RMS  
F=1.008e-06\Dipole=-0.0240775,1.0671493,-2.0408172\Quadrupole=3.161315  
3,-4.3372148,1.1758994,7.0797437,1.510745,0.7066837\PG=C01 [X(C42H78Al  
1O1P1Si6)]\@

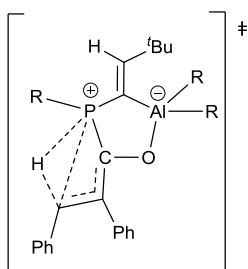

TS for the formation of (*E*)-**13** via Carbene

HF=-4045.0644177 au (1, -869.8075cm<sup>-1</sup>)

```

1\1\GINC-LUPUS08\FTS\RTPSSSTPSS\def2TZVP\C42H78Al1O1P1Si6\WURTHWE\14-Ma
r-2018\0\#\ tpsstps/def2tzvp Opt=(gdiis,ts,noeigentest,readfc,maxstep
=8) emp=gd3bj freq pop=nbo int=(grid=ultrafine,acc2e=11) geom=check gu
ess=read\cyclopropenon-FLP-adduct TF for Hydrogen-shift\0,1\C,-0.2152406472,-
0.946952286,0.5494608944\C,-0.29899
81891,-0.0472967893,1.6228992311\C,0.8036970388,0.7746327348,1.8989869
278\C,1.9569706592,0.6976774816,1.12447445\C,2.0319409175,-0.203509213
1,0.0604566995\C,0.9415331217,-1.0260679067,-0.222850139\C,-1.52806089
63,0.0258620835,2.4545120673\C,-2.8279252684,-0.1237959902,1.872956717
5\O,-3.1347458105,-0.1002495225,0.635755321\Al,-4.9036860923,0.5905361
66,0.2555515248\C,-4.755928394,2.5837903221,0.4295690634\Si,-3.3177797
072,3.3472730044,-0.5250691188\C,-3.5242002765,2.989148081,-2.36387353
26\C,-1.6010602144,0.3274917536,3.8026717972\C,-0.5301536318,0.2942638
846,4.7505321204\C,0.3488690903,-0.8161890043,4.8275060506\C,1.2934576
527,-0.9043035402,5.8417063561\C,1.4306806768,0.1331164388,6.769602804
8\C,0.5907408192,1.2493671289,6.6939235802\C,-0.3988153486,1.315901566
,5.7216589778\P,-4.1840801548,-0.2302382723,3.1140204686\C,-5.58631752
96,-0.2417246317,2.0031740885\C,-6.7072231744,-0.8404102895,2.45941747
66\C,-8.0503059883,-0.9887699655,1.7693119911\C,-8.3349462272,0.176842
2486,0.8179432439\C,-4.121246078,-1.5225277968,4.4066087585\Si,-4.8796
506414,-0.8560605377,6.0393731116\C,-4.0901652453,0.7925522518,6.48246
3907\Si,-4.4396792182,-3.3467838786,3.9570381142\C,-4.2120079164,-3.61
0848457,2.1176838995\C,-3.1279911576,-4.3443295832,4.8723788952\C,-6.1
44625597,-3.9595658576,4.4775535679\C,-5.5036919159,-0.2973914084,-1.4
357452228\Si,-6.6525662127,0.6054207981,-2.6433370413\C,-8.1414117713,
-0.5183341586,-2.969583568\Si,-4.2765400683,-1.4249629405,-2.321882467
9\C,-2.794190986,-0.5215217789,-3.0589181171\C,-5.1129358175,-2.447010
679,-3.6848189169\C,-3.587336686,-2.7595299415,-1.1775563798\C,-8.0586
367727,-2.3257923559,0.9909513164\C,-9.1463066149,-1.036363278,2.85316
92986\Si,-5.0442323312,3.4464264742,2.0794500125\C,-5.8038333828,5.157
9564347,1.7859292885\C,-6.3099781539,2.6647562665,3.2577855327\C,-3.44
19540411,3.6544176006,3.066018511\C,-6.7432817777,-0.6164393179,5.9585
753551\C,-4.4582197518,-2.0833531688,7.4065356259\C,-1.6408362723,2.68
5203155,0.0191416705\C,-3.1961405554,5.2364365341,-0.4184628785\C,-7.3
526055677,2.2601184083,-2.0367313389\C,-5.8941793253,1.0281884522,-4.3
259245\H,-5.6423464216,2.8937498401,-0.1552836076\H,-6.7525566283,5.06
01712681,1.2420194136\H,-5.1630694417,5.8325111591,1.2138926782\H,-6.0
266649373,5.6395051464,2.7468225271\H,-7.2502405063,2.4275536684,2.748
7788717\H,-6.5342720186,3.4026092597,4.0397559915\H,-5.9642489475,1.75

```

3325963,3.7503956763\H,-2.7369492311,4.3230589133,2.5596216637\H,-2.92  
11741779,2.70339033,3.2357909862\H,-3.6615221641,4.0901433406,4.049164  
1953\H,-3.6882451368,1.9253168239,-2.5504367451\H,-2.6296006738,3.2896  
514684,-2.923331357\H,-4.3762769997,3.5388756059,-2.7802965521\H,-1.49  
48821019,1.6426769807,-0.2757600175\H,-1.5052942393,2.7405485163,1.104  
050042\H,-0.840887115,3.276755759,-0.443434589\H,-4.1093965543,5.72945  
31681,-0.7706210645\H,-2.3740202336,5.5622179084,-1.0699026401\H,-2.97  
97176263,5.6065072535,0.5892402026\H,-6.1895340266,-1.0554052584,-1.00  
78894426\H,-3.0720420511,0.1998039862,-3.8337053396\H,-2.2256996306,0.  
0110134563,-2.2881287134\H,-2.1192220672,-1.2553052423,-3.5184418783\H  
, -5.5665930781,-1.8591211726,-4.4872386186\H,-4.3713408275,-3.11469992  
96,-4.1429379272\H,-5.8986705091,-3.0811523379,-3.2547758062\H,-3.0369  
549937,-2.3441691605,-0.3313093397\H,-4.3831829187,-3.3986495827,-0.77  
97111664\H,-2.9026599409,-3.4040939586,-1.7441426655\H,-8.6838252826,-  
0.742128488,-2.0435492961\H,-8.8481206491,-0.0429537454,-3.6613283049\  
H,-7.8333572151,-1.4728180742,-3.4101400587\H,-7.7868315618,2.22102978  
58,-1.0327596836\H,-6.59313701,3.0488729365,-2.0452112456\H,-8.1492179  
835,2.5702113259,-2.7260961256\H,-5.4916574679,0.1631585785,-4.8599950  
213\H,-6.6853658826,1.4603846599,-4.9531192745\H,-5.0980211086,1.77368  
20593,-4.2473612493\H,-6.6982627235,-1.3125657422,3.4456964961\H,-7.56  
85130099,0.2484906737,0.0432420142\H,-8.359770552,1.1253756303,1.36227  
40321\H,-9.2996577372,0.0387355519,0.317685653\H,-7.2985792668,-2.3221  
148404,0.2040791277\H,-9.0386433776,-2.4867841286,0.5267081568\H,-7.85  
29933036,-3.1699734509,1.6581697662\H,-9.1612883785,-0.1088269517,3.43  
55285502\H,-8.9791008821,-1.8702569335,3.5449502402\H,-10.1312955065,-  
1.1686921438,2.3921154331\H,-3.4588824066,0.8016434079,3.8618714908\H,  
-3.0472762163,-1.5011283002,4.6547919084\H,-3.2011410351,-3.3303890955  
,1.8019826694\H,-4.9194196487,-3.0167503811,1.5331432041\H,-4.35537307  
36,-4.6657058839,1.8542184814\H,-2.1215570465,-4.0200912602,4.58038350  
09\H,-3.2170859718,-5.4095215924,4.6261012329\H,-3.2073389134,-4.24622  
70659,5.9596766215\H,-6.9539266036,-3.4493171667,3.9461081149\H,-6.321  
4302596,-3.8439677053,5.5520619437\H,-6.2240364184,-5.0292148316,4.245  
5601856\H,-4.3521405239,1.5891123713,5.7780180947\H,-2.9985414016,0.71  
8348373,6.5178252838\H,-4.4416066839,1.1031727511,7.4748686093\H,-7.02  
37811772,0.1504370853,5.2287891623\H,-7.0949838233,-0.2773619064,6.941  
554685\H,-7.2846202785,-1.5353562985,5.7128721989\H,-3.3748038236,-2.2  
268399753,7.4900385017\H,-4.919237749,-3.0651305823,7.2574173147\H,-4.  
8152734984,-1.6938160068,8.3679815176\H,-1.0764035286,2.1638175374,5.6  
769645749\H,0.2628206721,-1.6040758498,4.0848360274\H,1.9445445113,-1.  
7726124289,5.8987018131\H,2.1841121802,0.0701264549,7.5494381709\H,0.6  
957330965,2.0565620255,7.4136842329\H,-1.0602714096,-1.5850730918,0.31  
34965269\H,0.9871520991,-1.7285732158,-1.0504929697\H,2.9314510516,-0.  
2595723251,-0.5460404806\H,2.7974717561,1.3495013693,1.3462539554\H,0.  
7459321655,1.4866249209,2.715844122\Version=AS64L-G09RevD.01\State=1-  
A\HF=-4045.0644177\RMSD=2.576e-09\RMSF=4.389e-07\Dipole=0.2358876,-1.2  
75256,1.9928573\Quadrupole=7.2493062,-6.0634406,-1.1858656,2.1030382,0  
.0080653,-0.5917315\PG=C01 [X(C42H78Al1O1P1Si6)]\@

---

<sup>1</sup> Gaussian 09, Revision D.01, M. J. Frisch, G. W. Trucks, H. B. Schlegel, G. E. Scuseria, M. A. Robb, J. R. Cheeseman, G. Scalmani, V. Barone, B. Mennucci, G. A. Petersson, H. Nakatsuji, M. Caricato, X. Li, H. P. Hratchian, A. F. Izmaylov, J. Bloino, G. Zheng, J. L. Sonnenberg, M. Hada, M. Ehara, K. Toyota, R. Fukuda, J. Hasegawa, M. Ishida, T. Nakajima, Y. Honda, O. Kitao, H. Nakai, T. Vreven, J. A. Montgomery, Jr., J. E. Peralta, F. Ogliaro, M. Bearpark, J. J. Heyd, E. Brothers, K. N. Kudin, V. N. Staroverov, R. Kobayashi, J. Normand, K. Raghavachari, A. Rendell, J. C. Burant, S. S. Iyengar, J. Tomasi, M. Cossi, N. Rega, N. J. Millam, M. Klene, J. E. Knox, J. B. Cross, V. Bakken, C. Adamo, J. Jaramillo, R. Gomperts, R. E. Stratmann, O. Yazyev, A. J. Austin, R. Cammi, C. Pomelli, J. W. Ochterski, R. L. Martin, K. Morokuma, V. G. Zakrzewski, G. A. Voth, P. Salvador, J. J. Dannenberg, S. Dapprich, A. D. Daniels, Ö. Farkas, J. B. Foresman, J. V. Ortiz, J. Cioslowski, D. J. Fox, Gaussian, Inc., Wallingford CT, 2009.

<sup>2</sup> J. M. Tao, J. P. Perdew, V. N. Staroverov, G. E. Scuseria, *Phys. Rev. Lett.* **2003**, *91*, 146401.

<sup>3</sup> S. Grimme, S. Ehrlich, L. Goerigk, *J. Comput. Chem.* **2011**, *32*, 1456-1465.; for a review, see: S. Grimme, A. Hansen, J. G. Brandenburg, C. Bannwarth, *Chem. Rev.* **2016**, *116*, 5105-5154.

<sup>4</sup> F. Weigend, R. Ahlrichs, *Phys. Chem. Chem. Phys.* **2005**, *7*, 3297-3305.
